# Supplementary material for: Identification of potential functional peptides involved in demyelinating injury in the central nervous system
Source: PeerJ. 2023 Aug 21;11:e15846. doi: 10.7717/peerj.15846 (PMC10448882; doi:10.7717/peerj.15846)
Supplement: Supplemental Information 2 [file peerj-11-15846-s002.xlsx]

## Sheet: 差异多肽
	多肽序列	归一化 con_2 样本质谱强度	归一化 con_5 样本质谱强度	归一化 con_6 样本质谱强度	归一化 cp4_4 样本质谱强度	归一化 cp4_5 样本质谱强度
mainID	Sequence	Intensity_nor con_2	Intensity_nor con_5	Intensity_nor con_6	Intensity_nor cp4_4	Intensity_nor cp4_5	Intensity_nor cp4_6	Ratio	LogRatio	p Value	LogP	Sig	Entry	Entry name	Protein names	Gene names	N-term cleavage window	C-term cleavage window	Amino acid before	First amino acid	Second amino acid	Second last amino acid	Last amino acid	Amino acid after	A Count	R Count	N Count	D Count	C Count	Q Count	E Count	G Count	H Count	I Count	L Count	K Count	M Count	F Count	P Count	S Count	T Count	W Count	Y Count	V Count	U Count	O Count	Length	Missed cleavages	Mass
pep48	AAGHLDDLPGALSALSDLHAH	0.00668217	0.0125427	0.0094149	0.0297689	0.0546226	0.0573303	4.94843	2.30697	0.0134798	1.87032	1	P01942	HBA_MOUSE	Hemoglobin subunit alpha (Alpha-globin) (Hemoglobin alpha chain)	Hba Hba-a1	QVKGHGKKVADALASAAGHLDDLPGALSAL	DLPGALSALSDLHAHKLRVDPVNFKLLSHC	S	A	A	A	H	K	5	0	0	3	0	0	0	2	3	0	5	0	0	0	1	2	0	0	0	0	0	0	21		2080.03
pep64	AALTRNPQFQKLLE	0.0516422	0.0193868	0.0931967	0.125951	0.121269	0.12138	2.24447	1.16638	0.0335166	1.47474	1	P06745	G6PI_MOUSE	Glucose-6-phosphate isomerase (GPI) (EC 5.3.1.9) (Autocrine motility factor) (AMF) (Neuroleukin) (NLK) (Phosphoglucose isomerase) (PGI) (Phosphohexose isomerase) (PHI)	Gpi Gpi1	______________________________	MAALTRNPQFQKLLEWHRANSANLKLRELF	M	A	A	L	E	W	2	1	1	0	0	2	1	0	0	0	3	1	0	1	1	0	1	0	0	0	0	0	14		1627.9
pep71	AAPAAAAAPAKAE	0.00230443	0.00432548	0.00324684	0.0166732	0.0174331	0.00912645	4.37722	2.13002	0.0149078	1.82659	1	P14869	RLA0_MOUSE	60S acidic ribosomal protein P0 (60S ribosomal protein L10E)	Rplp0 Arbp	PSAFAAAAPAAAATTAAPAAAAAPAKAEAK	TTAAPAAAAAPAKAEAKEESEESDEDMGFG	T	A	A	A	E	A	9	0	0	0	0	0	1	0	0	0	0	1	0	0	2	0	0	0	0	0	0	0	13		1108.59
pep82	AAQKINEGLEHLAKAEKYLKTGFL	0.0146562	0.0275102	0.02065	0.0652932	0.189826	0.18083	6.94004	2.79494	0.0366174	1.43631	1	Q9CWZ7	SNAG_MOUSE	Gamma-soluble NSF attachment protein (SNAP-gamma) (N-ethylmaleimide-sensitive factor attachment protein gamma)	Napg Snapg	______________________________	EHLAKAEKYLKTGFLKWKPDYDSAASEYGK	M	A	A	F	L	K	4	0	1	0	0	1	3	2	1	1	4	4	0	1	0	0	1	0	1	0	0	0	24		2671.47
pep100	AASPGATPGSATASAERASTAAPVA	0.0984829	0.0369711	0.0277517	0.123213	0.171625	0.115618	2.51497	1.33054	0.0435521	1.36099	1	O88935	SYN1_MOUSE	Synapsin-1 (Synapsin I)	Syn1 Syn-1	MTDLQRPQPPPPPPSAASPGATPGSATASA	ATASAERASTAAPVASPAAPSPGSSGGGGF	S	A	A	V	A	S	10	1	0	0	0	0	1	2	0	0	0	0	0	0	3	4	3	0	0	1	0	0	25		2169.07
pep120	AASVDLELKKAFTELQAKV	0.00481449	0.00903695	0.00678341	0.0551343	0.0235542	0.0684258	7.12941	2.83378	0.0343488	1.46409	1	Q9CWM4	PFD1_MOUSE	Prefoldin subunit 1	Pfdn1	______________________________	DLELKKAFTELQAKVIDTQQKVKLADIQIE	M	A	A	K	V	I	4	0	0	1	0	1	2	0	0	0	3	3	0	1	0	1	1	0	0	2	0	0	19		2060.15
pep127	AAVKTLNPKAEVARAQAAL	0.00765843	0.0143751	0.0107904	0.0341181	0.0507681	0.0446216	3.94553	1.98022	0.00353015	2.45221	1	P80317	TCPZ_MOUSE	T-complex protein 1 subunit zeta (TCP-1-zeta) (CCT-zeta-1)	Cct6a Cct6 Cctz Cctz1	______________________________	TLNPKAEVARAQAALAVNISAARGLQDVLR	M	A	A	A	L	A	7	1	1	0	0	1	1	0	0	0	2	2	0	0	1	0	1	0	0	2	0	0	19		1921.11
pep188	ADKPDMGEIASFDK	0.0310616	0.0419601	0.0571824	0.112255	0.12813	0.0690381	2.37645	1.24881	0.0358936	1.44498	1	Q6ZWY8	TYB10_MOUSE	Thymosin beta-10	Tmsb10 Ptmb10	______________________________	MADKPDMGEIASFDKAKLKKTETQEKNTLP	M	A	D	D	K	A	2	0	0	3	0	0	1	1	0	1	0	2	1	1	1	1	0	0	0	0	0	0	14		1522.7
pep192	ADKQISLPAKLINGGIAG	0.00312162	0.00585939	0.00439824	0.0139067	0.0209143	0.0229101	4.31498	2.10935	0.00650934	2.18646	1	Q9D6M3	GHC1_MOUSE	Mitochondrial glutamate carrier 1 (GC-1) (Glutamate/H(+) symporter 1) (Solute carrier family 25 member 22)	Slc25a22 Gc1	______________________________	QISLPAKLINGGIAGLIGVTCVFPIDLAKT	M	A	D	A	G	L	3	0	1	1	0	1	0	3	0	3	2	2	0	0	1	1	0	0	0	0	0	0	18		1765.01
pep221	ADPTGAFGKATDL	0.18826	0.245237	0.147297	0.114767	0.0204585	0.0165613	0.261345	-1.93598	0.0289367	1.53855	-1	P99029	PRDX5_MOUSE	Peroxiredoxin-5, mitochondrial (EC 1.11.1.24) (Antioxidant enzyme B166) (AOEB166) (Liver tissue 2D-page spot 2D-0014IV) (PLP) (Peroxiredoxin V) (Prx-V) (Peroxisomal antioxidant enzyme) (Thioredoxin peroxidase PMP20) (Thioredoxin-dependent peroxiredoxin 5)	Prdx5 Prdx6	EWGRAHQAEGKVRLLADPTGAFGKATDLLL	LLADPTGAFGKATDLLLDDSLVSLFGNRRL	L	A	D	D	L	L	3	0	0	2	0	0	0	2	0	0	1	1	0	1	1	0	2	0	0	0	0	0	13		1262.61
pep259	AEDIKTKIKNYKTAPFDS	0.00735062	0.0137973	0.0103567	0.0663439	0.0484515	0.0291114	4.56779	2.1915	0.0264403	1.57773	1	P56391	CX6B1_MOUSE	Cytochrome c oxidase subunit 6B1 (Cytochrome c oxidase subunit VIb isoform 1) (COX VIb-1)	Cox6b1 Cox6b	______________________________	IKTKIKNYKTAPFDSRFPNQNQTKNCWQNY	M	A	E	D	S	R	2	0	1	2	0	0	1	0	0	2	0	4	0	1	1	1	2	0	1	0	0	0	18		2068.08
pep268	AEFPSKVSTRTSSPAQG	0.00349901	0.00656775	0.00492995	0.0202255	0.0210786	0.0138575	3.67825	1.87902	0.00541065	2.26675	1	Q9DCU2	PLLP_MOUSE	Plasmolipin (Plasma membrane proteolipid)	Pllp Plapi Pmlp Tm4sf11	______________________________	FPSKVSTRTSSPAQGVGASVSALRPDLGFV	M	A	E	Q	G	V	2	1	0	0	0	1	1	1	0	0	0	1	0	1	2	4	2	0	0	1	0	0	17		1748.87
pep342	AFTGEISPGMIKDLGATWV	0.028431	0.00611051	0.0229337	0.0388823	0.0437955	0.0469765	2.25583	1.17366	0.0277456	1.55681	1	P17751	TPIS_MOUSE	Triosephosphate isomerase (TIM) (EC 5.3.1.1) (Methylglyoxal synthase) (EC 4.2.3.3) (Triose-phosphate isomerase)	Tpi1 Tpi	KIAVAAQNCYKVTNGAFTGEISPGMIKDLG	EISPGMIKDLGATWVVLGHSERRHVFGESD	G	A	F	W	V	V	2	0	0	1	0	0	1	3	0	2	1	1	1	1	1	1	2	1	0	1	0	0	19		1992
pep389	AGLGHPSAF	0.00538661	0.0101108	0.0075895	0.0308241	0.0263533	0.0219894	3.42907	1.77782	0.00295294	2.52975	1	Q9CWS0	DDAH1_MOUSE	N(G),N(G)-dimethylarginine dimethylaminohydrolase 1 (DDAH-1) (Dimethylarginine dimethylaminohydrolase 1) (EC 3.5.3.18) (DDAHI) (Dimethylargininase-1)	Ddah1	______________________________	______________________________	M	A	G	A	F	G	2	0	0	0	0	0	0	2	1	0	1	0	0	1	1	1	0	0	0	0	0	0	9		855.424
pep402	AGLPRRIIKETQRLL	0.00625871	0.0117478	0.00881825	0.0278824	0.046628	0.0307594	3.92435	1.97245	0.0123602	1.90798	1	P61089	UBE2N_MOUSE	Ubiquitin-conjugating enzyme E2 N (EC 2.3.2.23) (Bendless-like ubiquitin-conjugating enzyme) (E2 ubiquitin-conjugating enzyme N) (Ubc13) (Ubiquitin carrier protein N) (Ubiquitin-protein ligase N)	Ube2n Blu	______________________________	AGLPRRIIKETQRLLAEPVPGIKAEPDESN	M	A	G	L	L	A	1	3	0	0	0	1	1	1	0	2	3	1	0	0	1	0	1	0	0	0	0	0	15		1763.09
pep427	AGQAFRKFLPLFDRVLV	0.399863	0.515717	0.250149	0.0459026	0.159635	0.0983881	0.260717	-1.93944	0.0263859	1.57863	-1	Q64433	CH10_MOUSE	10 kDa heat shock protein, mitochondrial (Hsp10) (10 kDa chaperonin) (Chaperonin 10) (CPN10)	Hspe1	______________________________	QAFRKFLPLFDRVLVERSAAETVTKGGIML	M	A	G	L	V	E	2	2	0	1	0	1	0	1	0	0	3	1	0	3	1	0	0	0	0	2	0	0	17		1976.14
pep449	AGRKLALKTIDWVSFVEV	0.0466237	0.0526841	0.0373946	0.231985	0.273399	0.287923	5.80317	2.53684	0.000226694	3.64456	1	Q9DCX2	ATP5H_MOUSE	ATP synthase subunit d, mitochondrial (ATPase subunit d) (ATP synthase peripheral stalk subunit d)	Atp5pd Atp5h	______________________________	KLALKTIDWVSFVEVMPQNQKAIGNALKSW	M	A	G	E	V	M	2	1	0	1	0	0	1	1	0	1	2	2	0	1	0	1	1	1	0	3	0	0	18		2031.15
pep456	AGRSAVSASSKWLDGFR	0.0138545	0.0260054	0.0195204	0.0826308	0.0677813	0.0873279	4.00369	2.00133	0.000973928	3.01147	1	Q9D855	QCR7_MOUSE	Cytochrome b-c1 complex subunit 7 (Complex III subunit 7) (Complex III subunit VII) (Ubiquinol-cytochrome c reductase complex 14 kDa protein)	Uqcrb	______________________________	RSAVSASSKWLDGFRKWYYNAAGFNKLGLM	M	A	G	F	R	K	3	2	0	1	0	0	0	2	0	0	1	1	0	1	0	4	0	1	0	1	0	0	17		1793.92
pep466	AGRVDLVDESGYVPGY	0.00376886	0.00707428	0.00531017	0.0167902	0.0224008	0.0247379	3.95764	1.98464	0.00332329	2.47843	1	Q7TQD2	TPPP_MOUSE	Tubulin polymerization-promoting protein (TPPP) (EC 3.6.5.-) (25 kDa brain-specific protein) (TPPP/p25) (p25-alpha)	Tppp	SHKERFDQSGKGKGKAGRVDLVDESGYVPG	GRVDLVDESGYVPGYKHAGTYDQKVQGGK_	K	A	G	G	Y	K	1	1	0	2	0	0	1	3	0	0	1	0	0	0	1	1	0	0	2	3	0	0	16		1695.81
pep492	AHLLEAERQE	0.0376881	0.0383542	0.0730828	0.00364121	0.00399871	0.00323698	0.0729381	-3.77718	0.0169346	1.77122	-1	Q9QXV0	PCS1N_MOUSE	ProSAAS (IA-4) (Proprotein convertase subtilisin/kexin type 1 inhibitor) (Proprotein convertase 1 inhibitor) (pro-SAAS) [Cleaved into: KEP; Big SAAS (b-SAAS); Little SAAS (l-SAAS); Big PEN-LEN (b-PEN-LEN) (SAAS CT(1-49)); PEN; PEN-20; PEN-19; Little LEN (l-LEN); Big LEN (b-LEN) (SAAS CT(25-40))]	Pcsk1n	RGEAAGAVQELARALAHLLEAERQERARAE	LARALAHLLEAERQERARAEAQEAEDQQAR	L	A	H	Q	E	R	2	1	0	0	0	1	3	0	1	0	2	0	0	0	0	0	0	0	0	0	0	0	10		1194.6
pep533	AKTEWLDGKHVVFG	0.00496324	0.00931617	0.006993	0.0251071	0.024282	0.0211852	3.31764	1.73016	0.000691444	3.16024	1	P17742	PPIA_MOUSE	Peptidyl-prolyl cis-trans isomerase A (PPIase A) (EC 5.2.1.8) (Cyclophilin A) (Cyclosporin A-binding protein) (Rotamase A) (SP18) [Cleaved into: Peptidyl-prolyl cis-trans isomerase A, N-terminally processed]	Ppia	NAGPNTNGSQFFICTAKTEWLDGKHVVFGK	TAKTEWLDGKHVVFGKVKEGMNIVEAMERF	T	A	K	F	G	K	1	0	0	1	0	0	1	2	1	0	1	2	0	1	0	0	1	1	0	2	0	0	14		1585.83
pep542	AKVAVLGASGGIGQPLSLLL	0.206777	0.067772	0.286229	0.39417	0.397956	0.343362	2.02484	1.01781	0.0444351	1.35227	1	P08249	MDHM_MOUSE	Malate dehydrogenase, mitochondrial (EC 1.1.1.37)	Mdh2 Mor1	GAALRRSFSTSAQNNAKVAVLGASGGIGQP	LGASGGIGQPLSLLLKNSPLVSRLTLYDIA	N	A	K	L	L	K	3	0	0	0	0	1	0	4	0	1	5	1	0	0	1	2	0	0	0	2	0	0	20		1863.12
pep561	ALEATDNQAIKALLQ	0.00301995	0.00566853	0.00425497	0.0205191	0.0231276	0.0119602	4.29614	2.10304	0.0147095	1.8324	1	P62774	MTPN_MOUSE	Myotrophin (Granule cell differentiation protein) (Protein V-1)	Mtpn Gcdp	SKGADKTVKGPDGLTALEATDNQAIKALLQ	ALEATDNQAIKALLQ_______________	T	A	L	L	Q	-	4	0	1	1	0	2	1	0	0	1	3	1	0	0	0	0	1	0	0	0	0	0	15		1597.87
pep606	AMDASHPSLQ	0.00612988	0.011506	0.00863673	0.0273084	0.0425039	0.0368532	4.05996	2.02146	0.00467124	2.33057	1	P06797	CATL1_MOUSE	Procathepsin L (EC 3.4.22.15) (Cathepsin L1) (Major excreted protein) (MEP) (p39 cysteine proteinase) [Cleaved into: Cathepsin L; Cathepsin L heavy chain; Cathepsin L light chain]	Ctsl Ctsl1	KALMKAVATVGPISVAMDASHPSLQFYSSG	GPISVAMDASHPSLQFYSSGIYYEPNCSSK	V	A	M	L	Q	F	2	0	0	1	0	1	0	0	1	0	1	0	1	0	1	2	0	0	0	0	0	0	10		1055.47
pep700	APLVETSTPL	0.0422602	0.0571374	0.0646198	0.00542442	0.035366	0.00482223	0.278097	-1.84634	0.0305148	1.51549	-1	Q9QXV0	PCS1N_MOUSE	ProSAAS (IA-4) (Proprotein convertase subtilisin/kexin type 1 inhibitor) (Proprotein convertase 1 inhibitor) (pro-SAAS) [Cleaved into: KEP; Big SAAS (b-SAAS); Little SAAS (l-SAAS); Big PEN-LEN (b-PEN-LEN) (SAAS CT(1-49)); PEN; PEN-20; PEN-19; Little LEN (l-LEN); Big LEN (b-LEN) (SAAS CT(25-40))]	Pcsk1n	SARPVKEPRSLSAASAPLVETSTPLRLRRA	LSAASAPLVETSTPLRLRRAVPRGEAAGAV	S	A	P	P	L	R	1	0	0	0	0	0	1	0	0	0	2	0	0	0	2	1	2	0	0	1	0	0	10		1026.56
pep706	APPEPVPPPRAA	0.0111054	0.0208452	0.015647	0.0965998	0.0543317	0.0547791	4.32186	2.11165	0.021076	1.67621	1	Q0VGU4	VGF_MOUSE	Neurosecretory protein VGF [Cleaved into: Neuroendocrine regulatory peptide-1 (NERP-1); Neuroendocrine regulatory peptide-2 (NERP-2); VGF-derived peptide TLQP-21; VGF-derived peptide TLQP-62]	Vgf	SIIEEVEEKRKRKKNAPPEPVPPPRAAPAP	KKNAPPEPVPPPRAAPAPTHVRSPQPPPPA	N	A	P	A	A	P	3	1	0	0	0	0	1	0	0	0	0	0	0	0	6	0	0	0	0	1	0	0	12		1197.65
pep750	APSGRMSVLKNLQSLDPSHRISD	0.142232	0.1409	0.277216	0.0133765	0.078123	0.0118915	0.184512	-2.43821	0.0386514	1.41283	-1	P09240	CCKN_MOUSE	Cholecystokinin (CCK) [Cleaved into: Cholecystokinin-33 (CCK33); Cholecystokinin-12 (CCK12); Cholecystokinin-8 (CCK8)]	Cck	RLGALLARYIQQVRKAPSGRMSVLKNLQSL	LKNLQSLDPSHRISDRDYMGWMDFGRRSAE	K	A	P	S	D	R	1	2	1	2	0	1	0	1	1	1	3	1	1	0	2	5	0	0	0	1	0	0	23		2507.29
pep764	APVISAEKAYHEQLS	0.00398818	0.00748593	0.00561917	0.0214215	0.0231858	0.0157948	3.53367	1.82117	0.00412983	2.38407	1	P68369	TBA1A_MOUSE	Tubulin alpha-1A chain (Alpha-tubulin 1) (Alpha-tubulin isotype M-alpha-1) (Tubulin alpha-1 chain) [Cleaved into: Detyrosinated tubulin alpha-1A chain]	Tuba1a Tuba1	NLVPYPRIHFPLATYAPVISAEKAYHEQLS	APVISAEKAYHEQLSVAEITNACFEPANQM	Y	A	P	L	S	V	3	0	0	0	0	1	2	0	1	1	1	1	0	0	1	2	0	0	1	1	0	0	15		1641.84
pep858	ASATRVIQKLRNWASGQDLQAK	0.0635989	0.0238754	0.0179216	0.144652	0.191698	0.271207	5.76452	2.5272	0.0134221	1.87218	1	Q9Z1P6	NDUA7_MOUSE	NADH dehydrogenase [ubiquinone] 1 alpha subcomplex subunit 7 (Complex I-B14.5a) (CI-B14.5a) (NADH-ubiquinone oxidoreductase subunit B14.5a)	Ndufa7	______________________________	QKLRNWASGQDLQAKLQLRYQEIAKRTQPP	M	A	S	A	K	L	4	2	1	1	0	3	0	1	0	1	2	2	0	0	0	2	1	1	0	1	0	0	22		2440.33
pep913	ASLDKFLASVSTVL	0.0933197	0.112681	0.0921704	0.0575581	0.0117478	0.00950991	0.264331	-1.91958	0.012664	1.89743	-1	P01942	HBA_MOUSE	Hemoglobin subunit alpha (Alpha-globin) (Hemoglobin alpha chain)	Hba Hba-a1	TLASHHPADFTPAVHASLDKFLASVSTVLT	HASLDKFLASVSTVLTSKYR__________	H	A	S	V	L	T	2	0	0	1	0	0	0	0	0	0	3	1	0	1	0	3	1	0	0	2	0	0	14		1449.81
pep928	ASLKPEFVDIINAKQ	0.0721663	0.0670075	0.0557093	0.00356722	0.0479225	0.015856	0.34557	-1.53295	0.0392427	1.40624	-1	P17751	TPIS_MOUSE	Triosephosphate isomerase (TIM) (EC 5.3.1.1) (Methylglyoxal synthase) (EC 4.2.3.3) (Triose-phosphate isomerase)	Tpi1 Tpi	ELASQPDVDGFLVGGASLKPEFVDIINAKQ	ASLKPEFVDIINAKQ_______________	G	A	S	K	Q	-	2	0	1	1	0	1	1	0	0	2	1	2	0	1	1	1	0	0	0	1	0	0	15		1671.92
pep944	ASNNTASIAQARKLVEQLK	0.0757687	0.0284441	0.021351	0.132891	0.11837	0.10289	2.82049	1.49594	0.0164195	1.78464	1	P63213	GBG2_MOUSE	Guanine nucleotide-binding protein G(I)/G(S)/G(O) subunit gamma-2 (G gamma-I)	Gng2	______________________________	TASIAQARKLVEQLKMEANIDRIKVSKAAA	M	A	S	L	K	M	4	1	2	0	0	2	1	0	0	1	2	2	0	0	0	2	1	0	0	1	0	0	19		2041.13
pep954	ASQSQGIQQLLQAEKRAAEKV	0.0242018	0.0454275	0.0340993	0.25557	0.118404	0.214356	5.67182	2.50381	0.0170908	1.76724	1	Q9CR51	VATG1_MOUSE	V-type proton ATPase subunit G 1 (V-ATPase subunit G 1) (V-ATPase 13 kDa subunit 1) (Vacuolar proton pump subunit G 1)	Atp6v1g1 Atp6g1	______________________________	IQQLLQAEKRAAEKVSEARKRKNRRLKQAK	M	A	S	K	V	S	4	1	0	0	0	5	2	1	0	1	2	2	0	0	0	2	0	0	0	1	0	0	21		2282.23
pep997	ASTMDHARHGFLPRH	0.0472857	0.0177514	0.0133247	0.0862864	0.0633935	0.0652938	2.74335	1.45594	0.0244648	1.61146	1	P04370	MBP_MOUSE	Myelin basic protein (MBP) (Myelin A1 protein)	Mbp Shi	ASQKRPSQRSKYLATASTMDHARHGFLPRH	ASTMDHARHGFLPRHRDTGILDSIGRFFSG	T	A	S	R	H	R	2	2	0	1	0	0	0	1	3	0	1	0	1	1	1	1	1	0	0	0	0	0	15		1731.84
pep1002	ATASTMDHARHGF	0.0181189	0.00680194	0.00510575	0.0413732	0.0328095	0.0479381	4.06709	2.024	0.00685832	2.16378	1	P04370	MBP_MOUSE	Myelin basic protein (MBP) (Myelin A1 protein)	Mbp Shi	VMASQKRPSQRSKYLATASTMDHARHGFLP	YLATASTMDHARHGFLPRHRDTGILDSIGR	L	A	T	G	F	L	3	1	0	1	0	0	0	1	2	0	0	0	1	1	0	1	2	0	0	0	0	0	13		1400.63
pep1103	AVFVDLEPTVIDEVR	0.0296088	0.0111153	0.00834351	0.0852224	0.0762515	0.036571	4.03616	2.01298	0.0386497	1.41285	1	P68369	TBA1A_MOUSE	Tubulin alpha-1A chain (Alpha-tubulin 1) (Alpha-tubulin isotype M-alpha-1) (Tubulin alpha-1 chain) [Cleaved into: Detyrosinated tubulin alpha-1A chain]	Tuba1a Tuba1	NTFFSETGAGKHVPRAVFVDLEPTVIDEVR	AVFVDLEPTVIDEVRTGTYRQLFHPEQLIT	R	A	V	V	R	T	1	1	0	2	0	0	2	0	0	1	1	0	0	1	1	0	1	0	0	4	0	0	15		1700.9
pep1126	AVNLSRNGPALQEA	0.00526878	0.00988966	0.00742348	0.0271287	0.0257768	0.0343287	3.86301	1.94973	0.00191769	2.71722	1	Q62418	DBNL_MOUSE	Drebrin-like protein (Actin-binding protein 1) (SH3 domain-containing protein 7)	Dbnl Abp1 Sh3p7	______________________________	MAVNLSRNGPALQEAYVRVVTEKSPTDWAL	M	A	V	E	A	Y	3	1	2	0	0	1	1	1	0	0	2	0	0	0	1	1	0	0	0	1	0	0	14		1438.75
pep1132	AVPGTQLSPSPTPATQSPKKPPA	0.12914	0.0675237	0.0962895	0.312894	0.181744	0.319714	2.7798	1.47498	0.0227865	1.64232	1	Q61548	AP180_MOUSE	Clathrin coat assembly protein AP180 (91 kDa synaptosomal-associated protein) (Clathrin coat-associated protein AP180) (Phosphoprotein F1-20)	Snap91	VMFAQPMMRPPFGAAAVPGTQLSPSPTPAT	PSPTPATQSPKKPPAKDPLADLNIKDFL__	A	A	V	P	A	K	3	0	0	0	0	2	0	1	0	0	1	2	0	0	7	3	3	0	0	1	0	0	23		2256.21
pep1160	AWGKIGGHGAEYGAEALE	0.00333539	0.00626063	0.0234971	0.089708	0.0943702	0.0443312	6.90202	2.78702	0.0191813	1.71712	1	P01942	HBA_MOUSE	Hemoglobin subunit alpha (Alpha-globin) (Hemoglobin alpha chain)	Hba Hba-a1	______________________________	KIGGHGAEYGAEALERMFASFPTTKTYFPH	A	A	W	L	E	R	4	0	0	0	0	0	3	5	1	1	1	1	0	0	0	0	0	1	1	0	0	0	18		1814.86
pep1177	AYGFRDPGPQL	0.0728402	0.0619711	0.0951934	0.00583581	0.0320439	0.028797	0.289893	-1.78641	0.0131007	1.8827	-1	P26339	CMGA_MOUSE	Chromogranin-A (CgA) [Cleaved into: Pancreastatin; Beta-granin; WE-14; Catestatin; GE-25; Serpinin-RRG; Serpinin (AL26); p-Glu serpinin precursor]	Chga	EDDPDRSMKLSFRTRAYGFRDPGPQLRRGW	FRTRAYGFRDPGPQLRRGWRPSSREDSVEA	R	A	Y	Q	L	R	1	1	0	1	0	1	0	2	0	0	1	0	0	1	2	0	0	0	1	0	0	0	11		1219.6
pep1251	DIDAWELRKGMNTL	0.00404189	0.00758676	0.00569485	0.0180065	0.0247576	0.0237673	3.84053	1.94131	0.00218339	2.66087	1	P12787	COX5A_MOUSE	Cytochrome c oxidase subunit 5A, mitochondrial (Cytochrome c oxidase polypeptide Va)	Cox5a	DEEFDARWVTYFNKPDIDAWELRKGMNTLV	PDIDAWELRKGMNTLVGYDLVPEPKIIDAA	P	D	I	T	L	V	1	1	1	2	0	0	1	1	0	1	2	1	1	0	0	0	1	1	0	0	0	0	14		1660.82
pep1282	DKVPKTAENF	0.00864955	0.0162355	0.0121869	0.0505648	0.0477858	0.0342557	3.577	1.83875	0.00440361	2.35619	1	P17742	PPIA_MOUSE	Peptidyl-prolyl cis-trans isomerase A (PPIase A) (EC 5.2.1.8) (Cyclophilin A) (Cyclosporin A-binding protein) (Rotamase A) (SP18) [Cleaved into: Peptidyl-prolyl cis-trans isomerase A, N-terminally processed]	Ppia	ADDEPLGRVSFELFADKVPKTAENFRALST	FELFADKVPKTAENFRALSTGEKGFGYKGS	A	D	K	N	F	R	1	0	1	1	0	0	1	0	0	0	0	2	0	1	1	0	1	0	0	1	0	0	10		1147.59
pep1296	DLIAYLKKATNE	0.00397559	0.00746231	0.00560144	0.0310704	0.0366552	0.0157449	4.8987	2.2924	0.0249541	1.60286	1	P62897	CYC_MOUSE	Cytochrome c, somatic	Cycs	TKMIFAGIKKKGERADLIAYLKKATNE___	ERADLIAYLKKATNE_______________	A	D	L	N	E	-	2	0	1	1	0	0	1	0	0	1	2	2	0	0	0	0	1	0	1	0	0	0	12		1377.75
pep1329	DPGKLYTL	0.0734447	0.137858	0.517403	0.647678	0.667195	0.781045	2.87622	1.52417	0.0344665	1.4626	1	P70296	PEBP1_MOUSE	Phosphatidylethanolamine-binding protein 1 (PEBP-1) (HCNPpp) [Cleaved into: Hippocampal cholinergic neurostimulating peptide (HCNP)]	Pebp1 Pbp Pebp	TQVMNRPSSISWDGLDPGKLYTLVLTDPDA	SISWDGLDPGKLYTLVLTDPDAPSRKDPKF	L	D	P	T	L	V	0	0	0	1	0	0	0	1	0	0	2	1	0	0	1	0	1	0	1	0	0	0	8		905.486
pep1362	DTGILDSIGRFFS	0.36652	0.271931	0.415018	0.259914	0.106739	0.140474	0.481388	-1.05473	0.0438069	1.35846	-1	P04370	MBP_MOUSE	Myelin basic protein (MBP) (Myelin A1 protein)	Mbp Shi	STMDHARHGFLPRHRDTGILDSIGRFFSGD	HRDTGILDSIGRFFSGDRGAPKRGSGKDSH	R	D	T	F	S	G	0	1	0	2	0	0	0	2	0	2	1	0	0	2	0	2	1	0	0	0	0	0	13		1426.71
pep1383	DYAGVTVDELGKVLTPTQVM	0.0192685	0.0411035	0.0221148	0.00279698	0.00307159	0.00248647	0.101289	-3.30344	0.0226673	1.6446	-1	P70296	PEBP1_MOUSE	Phosphatidylethanolamine-binding protein 1 (PEBP-1) (HCNPpp) [Cleaved into: Hippocampal cholinergic neurostimulating peptide (HCNP)]	Pebp1 Pbp Pebp	CLQEVDEPPQHALRVDYAGVTVDELGKVLT	TVDELGKVLTPTQVMNRPSSISWDGLDPGK	V	D	Y	V	M	N	1	0	0	2	0	1	1	2	0	0	2	1	1	0	1	0	3	0	1	4	0	0	20		2135.08
pep1443	ELENYIEHVLLHRP	0.00373705	0.00701456	0.00526534	0.0166485	0.0253913	0.017997	3.74833	1.90625	0.00698842	2.15562	1	Q0VGU4	VGF_MOUSE	Neurosecretory protein VGF [Cleaved into: Neuroendocrine regulatory peptide-1 (NERP-1); Neuroendocrine regulatory peptide-2 (NERP-2); VGF-derived peptide TLQP-21; VGF-derived peptide TLQP-62]	Vgf	QEEADAEERRLQEQEELENYIEHVLLHRP_	EELENYIEHVLLHRP_______________	E	E	L	R	P	-	0	1	1	0	0	0	3	0	2	1	3	0	0	0	1	0	0	0	1	1	0	0	14		1760.92
pep1446	ELFADKVPKTAENF	0.839595	0.907983	1.09771	0.331344	0.316119	0.29746	0.332101	-1.5903	0.00123965	2.9067	-1	P17742	PPIA_MOUSE	Peptidyl-prolyl cis-trans isomerase A (PPIase A) (EC 5.2.1.8) (Cyclophilin A) (Cyclosporin A-binding protein) (Rotamase A) (SP18) [Cleaved into: Peptidyl-prolyl cis-trans isomerase A, N-terminally processed]	Ppia	FDITADDEPLGRVSFELFADKVPKTAENFR	FELFADKVPKTAENFRALSTGEKGFGYKGS	F	E	L	N	F	R	2	0	1	1	0	0	2	0	0	0	1	2	0	2	1	0	1	0	0	1	0	0	14		1607.82
pep1462	ELRPTLNEL	0.00523062	0.00981804	0.00736972	0.0233023	0.0442183	0.0474554	5.12865	2.35858	0.0159321	1.79773	1	P12787	COX5A_MOUSE	Cytochrome c oxidase subunit 5A, mitochondrial (Cytochrome c oxidase polypeptide Va)	Cox5a	DKAGPHKEIYPYVIQELRPTLNELGISTPE	YPYVIQELRPTLNELGISTPEELGLDKV__	Q	E	L	E	L	G	0	1	1	0	0	0	2	0	0	0	3	0	0	0	1	0	1	0	0	0	0	0	9		1083.59
pep1506	ERPVFTNHFLVELHKD	0.0551405	0.0480885	0.0388411	0.0186392	0.0243635	0.0216216	0.454875	-1.13646	0.00668639	2.17481	-1	P21661	NEC2_MOUSE	Neuroendocrine convertase 2 (NEC 2) (EC 3.4.21.94) (KEX2-like endoprotease 2) (Prohormone convertase 2) (Proprotein convertase 2) (PC2)	Pcsk2 Nec-2 Nec2	KAAGFLFCVMVFASAERPVFTNHFLVELHK	RPVFTNHFLVELHKDGEEEARQVAAEHGFG	A	E	R	K	D	G	0	1	1	1	0	0	2	0	2	0	2	1	0	2	1	0	1	0	0	2	0	0	16		1980.02
pep1532	EVRPQVHPNYRVTV	0.364161	0.683543	0.513088	1.62233	2.9577	2.8633	4.76894	2.25367	0.0111939	1.95102	1	Q9WTT4	VATG2_MOUSE	V-type proton ATPase subunit G 2 (V-ATPase subunit G 2) (V-ATPase 13 kDa subunit 2) (Vacuolar proton pump subunit G 2)	Atp6v1g2 Atp6g2 Ng38	RNRERVLAQLLGMVCEVRPQVHPNYRVTV_	CEVRPQVHPNYRVTV_______________	C	E	V	T	V	-	0	2	1	0	0	1	1	0	1	0	0	0	0	0	2	0	1	0	1	4	0	0	14		1692.91
pep1557	FASFPTTKT	0.00586289	0.0110048	0.00826057	0.0422973	0.0286834	0.0331685	4.1447	2.05127	0.00351276	2.45435	1	P01942	HBA_MOUSE	Hemoglobin subunit alpha (Alpha-globin) (Hemoglobin alpha chain)	Hba Hba-a1	GGHGAEYGAEALERMFASFPTTKTYFPHFD	EALERMFASFPTTKTYFPHFDVSHGSAQVK	M	F	A	K	T	Y	1	0	0	0	0	0	0	0	0	0	0	1	0	2	1	1	3	0	0	0	0	0	9		998.507
pep1567	FDITADDEPLGRVSFE	0.00265188	0.00497766	0.00373638	0.016195	0.012974	0.0139309	3.79202	1.92297	0.000822981	3.08461	1	P17742	PPIA_MOUSE	Peptidyl-prolyl cis-trans isomerase A (PPIase A) (EC 5.2.1.8) (Cyclophilin A) (Cyclosporin A-binding protein) (Rotamase A) (SP18) [Cleaved into: Peptidyl-prolyl cis-trans isomerase A, N-terminally processed]	Ppia	______________________________	DITADDEPLGRVSFELFADKVPKTAENFRA	F	F	D	F	E	L	1	1	0	3	0	0	2	1	0	1	1	0	0	2	1	1	1	0	0	1	0	0	16		1809.84
pep1606	FGGFTGARKSARKLANQ	0.233837	0.139765	0.313416	0.0794917	0.0571826	0.0656431	0.294487	-1.76373	0.0331333	1.47974	-1	Q64387	PNOC_MOUSE	Prepronociceptin (N23K/N27K) [Cleaved into: Nocistatin; Nociceptin (Orphanin FQ) (PPNOC); Orphanin FQ2]	Pnoc Npnc1	ADDAEEVEQKQLQKRFGGFTGARKSARKLA	GFTGARKSARKLANQKRFSEFMRQYLVLSM	R	F	G	N	Q	K	3	2	1	0	0	1	0	3	0	0	1	2	0	2	0	1	1	0	0	0	0	0	17		1807.98
pep1646	FLKGGGGGGGGGGLGGGLGN	0.00543289	0.0101977	0.00765471	0.0269773	0.0265797	0.0257105	3.40419	1.76731	0.000197115	3.70528	1	O88456	CPNS1_MOUSE	Calpain small subunit 1 (CSS1) (Calcium-activated neutral proteinase small subunit) (CANP small subunit) (Calcium-dependent protease small subunit) (CDPS) (Calcium-dependent protease small subunit 1) (Calpain regulatory subunit)	Capns1 Capn4	______________________________	GGGGGGGGLGGGLGNVLGGLISGAAGGGGG	S	F	L	G	N	V	0	0	1	0	0	0	0	14	0	0	3	1	0	1	0	0	0	0	0	0	0	0	20		1544.77
pep1697	FPWGDGNHTLF	0.00435277	0.00817029	0.00613287	0.0293327	0.0212954	0.0354265	4.61272	2.20562	0.00608331	2.21586	1	P43024	CX6A1_MOUSE	Cytochrome c oxidase subunit 6A1, mitochondrial (Cytochrome c oxidase polypeptide VIa-liver)	Cox6a1 Cox6al	PPFVAYPHLRIRTKPFPWGDGNHTLFHNPH	RTKPFPWGDGNHTLFHNPHVNPLPTGYEDE	P	F	P	L	F	H	0	0	1	1	0	0	0	2	1	0	1	0	0	2	1	0	1	1	0	0	0	0	11		1289.58
pep1702	FQMPDQGMTSADDFFQGTKA	0.00379255	0.00711873	0.00534354	0.0177712	0.0185545	0.0161103	3.22588	1.68969	0.000553101	3.2572	1	O08553	DPYL2_MOUSE	Dihydropyrimidinase-related protein 2 (DRP-2) (Unc-33-like phosphoprotein 2) (ULIP-2)	Dpysl2 Crmp2 Ulip2	HSRMVIPGGIDVHTRFQMPDQGMTSADDFF	QGMTSADDFFQGTKAALAGGTTMIIDHVVP	R	F	Q	K	A	A	2	0	0	3	0	3	0	2	0	0	0	1	2	3	1	1	2	0	0	0	0	0	20		2220.95
pep1715	FSDIYKIREIADGL	0.00525609	0.00986585	0.00740561	0.0234157	0.027593	0.0258365	3.41117	1.77027	0.000549347	3.26015	1	P63028	TCTP_MOUSE	Translationally-controlled tumor protein (TCTP) (21 kDa polypeptide) (p21) (p23)	Tpt1 Trt	______________________________	LFSDIYKIREIADGLCLEVEGKMVSRTEGA	L	F	S	G	L	C	1	1	0	2	0	0	1	1	0	3	1	1	0	1	0	1	0	0	1	0	0	0	14		1638.86
pep1803	GAPPGYRPSAWVHLLH	0.0166026	0.0311636	0.0233924	0.113103	0.10076	0.065753	3.92948	1.97434	0.00932518	2.03034	1	Q9D3A9	TTYH1_MOUSE	Protein tweety homolog 1 (mTTY1)	Ttyh1	______________________________	APPGYRPSAWVHLLHQLPRADFQLRPVPSG	M	G	A	L	H	Q	2	1	0	0	0	0	0	2	2	0	2	0	0	0	3	1	0	1	1	1	0	0	16		1756.92
pep1855	GDVNTDRPGLLDL	0.00389413	0.0073094	0.00548666	0.0220877	0.0190515	0.0283488	4.1634	2.05776	0.00376906	2.42377	1	P31786	ACBP_MOUSE	Acyl-CoA-binding protein (ACBP) (Diazepam-binding inhibitor) (DBI) (Endozepine) (EP)	Dbi	EEMLFIYSHFKQATVGDVNTDRPGLLDLKG	TVGDVNTDRPGLLDLKGKAKWDSWNKLKGT	V	G	D	D	L	K	0	1	1	3	0	0	0	2	0	0	3	0	0	0	1	0	1	0	0	1	0	0	13		1383.7
pep1884	GFLVGGASLKPEFVDIINAKQ	0.0299443	0.0494362	0.0613762	0.00318938	0.0175126	0.0197805	0.287606	-1.79784	0.0337249	1.47205	-1	P17751	TPIS_MOUSE	Triosephosphate isomerase (TIM) (EC 5.3.1.1) (Methylglyoxal synthase) (EC 4.2.3.3) (Triose-phosphate isomerase)	Tpi1 Tpi	TGATCKELASQPDVDGFLVGGASLKPEFVD	ASLKPEFVDIINAKQ_______________	D	G	F	K	Q	-	2	0	1	1	0	1	1	3	0	2	2	2	0	2	1	1	0	0	0	2	0	0	21		2202.2
pep1931	GHKLGLGLEFQA	0.00386866	0.0072616	0.0272539	0.0292342	0.0508069	0.0501714	3.39235	1.76229	0.0395746	1.40258	1	Q60932	VDAC1_MOUSE	Voltage-dependent anion-selective channel protein 1 (VDAC-1) (mVDAC1) (Outer mitochondrial membrane protein porin 1) (Plasmalemmal porin) (Voltage-dependent anion-selective channel protein 5) (VDAC-5) (mVDAC5)	Vdac1 Vdac5	LTLSALLDGKNVNAGGHKLGLGLEFQA___	NAGGHKLGLGLEFQA_______________	G	G	H	Q	A	-	1	0	0	0	0	1	1	3	1	0	3	1	0	1	0	0	0	0	0	0	0	0	12		1268.69
pep1998	GKYTPSGQSGAAASESLFISNHAY	0.0624543	0.0696601	0.0552673	0.0328528	0.00721565	0.0452378	0.455254	-1.13526	0.0464348	1.33316	-1	P05064	ALDOA_MOUSE	Fructose-bisphosphate aldolase A (EC 4.1.2.13) (Aldolase 1) (Muscle-type aldolase)	Aldoa Aldo1	EEYIKRALANSLACQGKYTPSGQSGAAASE	GAAASESLFISNHAY_______________	Q	G	K	A	Y	-	4	0	1	0	0	1	1	3	1	1	1	1	0	1	1	5	1	0	2	0	0	0	24		2442.15
pep2038	GMNTLVGY	0.00637545	0.0119669	0.00898274	0.0284025	0.0493136	0.0462112	4.53529	2.18119	0.00866596	2.06218	1	P12787	COX5A_MOUSE	Cytochrome c oxidase subunit 5A, mitochondrial (Cytochrome c oxidase polypeptide Va)	Cox5a	TYFNKPDIDAWELRKGMNTLVGYDLVPEPK	DAWELRKGMNTLVGYDLVPEPKIIDAALRA	K	G	M	G	Y	D	0	0	1	0	0	0	0	2	0	0	1	0	1	0	0	0	1	0	1	1	0	0	8		853.4
pep2044	GNLPFNTV	0.00328019	0.00615702	0.0231082	0.0376081	0.0321147	0.0402611	3.3794	1.75677	0.0176821	1.75247	1	Q9WUK2	IF4H_MOUSE	Eukaryotic translation initiation factor 4H (eIF-4H) (Williams-Beuren syndrome chromosomal region 1 protein homolog)	Eif4h Wbscr1	SQKELPTEPPYTAYVGNLPFNTVQGDIDAI	PPYTAYVGNLPFNTVQGDIDAIFKDLSIRS	V	G	N	T	V	Q	0	0	2	0	0	0	0	1	0	0	1	0	0	1	1	0	1	0	0	1	0	0	8		860.439
pep2051	GNPKATPPQIVNGNH	0.0174123	0.0408208	0.00490663	0.0760392	0.0705934	0.0571576	3.22761	1.69047	0.0170939	1.76716	1	Q91VW3	SH3L3_MOUSE	SH3 domain-binding glutamic acid-rich-like protein 3	Sh3bgrl3	ISQDNALRDEMRTLAGNPKATPPQIVNGNH	GNPKATPPQIVNGNHYCGDYELFVEAVEQD	A	G	N	N	H	Y	1	0	3	0	0	1	0	2	1	1	0	1	0	0	3	0	1	0	0	1	0	0	15		1542.79
pep2093	GPPQPGPGPQRQGPPLQ	0.00220978	0.00414784	0.00311349	0.00984453	0.0158156	0.0140957	4.19759	2.06956	0.00559843	2.25193	1	O88935	SYN1_MOUSE	Synapsin-1 (Synapsin I)	Syn1 Syn-1	QPAGPPAQQRPPPQGGPPQPGPGPQRQGPP	PQPGPGPQRQGPPLQQRPPPQGQQHLSGLG	G	G	P	L	Q	Q	0	1	0	0	0	4	0	4	0	0	1	0	0	0	7	0	0	0	0	0	0	0	17		1706.89
pep2118	GRLDSGQLGLYPANYVEAI	0.00378482	0.00710422	0.00533265	0.0168613	0.0236003	0.0216063	3.82623	1.93592	0.0023215	2.63423	1	Q61644	PACN1_MOUSE	Protein kinase C and casein kinase substrate in neurons protein 1 (Syndapin-1)	Pacsin1 Pacsin	ELTKLGEEDEQGWCRGRLDSGQLGLYPANY	SGQLGLYPANYVEAI_______________	R	G	R	A	I	-	2	1	1	1	0	1	1	3	0	1	3	0	0	0	1	1	0	0	2	1	0	0	19		2035.04
pep2140	GSAKVAFSAIRSTN	0.328068	0.299024	0.391665	0.0988691	0.132988	0.248588	0.471599	-1.08437	0.027515	1.56043	-1	Q9R171	CBLN1_MOUSE	Cerebellin-1 (Brain protein D3) (Precerebellin) [Cleaved into: Cerebellin (CER); [des-Ser1]-cerebellin (des-Ser1-cerebellin)]	Cbln1	TSDPTGTALGISVRSGSAKVAFSAIRSTNH	SGSAKVAFSAIRSTNHEPSEMSNRTMIIYF	S	G	S	T	N	H	3	1	1	0	0	0	0	1	0	1	0	1	0	1	0	3	1	0	0	1	0	0	14		1407.75
pep2195	GVFDVSNA	0.0180044	0.00675897	0.00507349	0.0261561	0.0296851	0.0242375	2.68388	1.42432	0.018455	1.73389	1	Q04447	KCRB_MOUSE	Creatine kinase B-type (EC 2.7.3.2) (B-CK) (Creatine kinase B chain) (Creatine phosphokinase B-type) (CPK-B)	Ckb Ckbb	LQKRGTGGVDTAAVGGVFDVSNADRLGFSE	VDTAAVGGVFDVSNADRLGFSEVELVQMVV	G	G	V	N	A	D	1	0	1	1	0	0	0	1	0	0	0	0	0	1	0	1	0	0	0	2	0	0	8		807.376
pep2201	GVQVSPSGEKI	0.00696352	0.0130708	0.00981131	0.031723	0.0340681	0.0504422	3.89449	1.96143	0.00941367	2.02624	1	P52503	NDUS6_MOUSE	NADH dehydrogenase [ubiquinone] iron-sulfur protein 6, mitochondrial (Complex I-13kD-A) (CI-13kD-A) (NADH-ubiquinone oxidoreductase 13 kDa-A subunit)	Ndufs6 Ip13	TFRRLLTLPRAARGFGVQVSPSGEKITHTG	ARGFGVQVSPSGEKITHTGQVYDEKDYRRV	F	G	V	K	I	T	0	0	0	0	0	1	1	2	0	1	0	1	0	0	1	2	0	0	0	2	0	0	11		1099.59
pep2213	GVTVDELGKVLTPTQVMNRPSSISW	0.00535727	0.0100558	0.0377409	0.0463485	0.0487463	0.0572282	2.8657	1.51889	0.0358643	1.44534	1	P70296	PEBP1_MOUSE	Phosphatidylethanolamine-binding protein 1 (PEBP-1) (HCNPpp) [Cleaved into: Hippocampal cholinergic neurostimulating peptide (HCNP)]	Pebp1 Pbp Pebp	EVDEPPQHALRVDYAGVTVDELGKVLTPTQ	LTPTQVMNRPSSISWDGLDPGKLYTLVLTD	A	G	V	S	W	D	0	1	1	1	0	1	1	2	0	1	2	1	1	0	2	3	3	1	0	4	0	0	25		2713.41
pep2251	HEQLSVAEITN	0.00613681	0.011519	0.00864651	0.0273393	0.0418513	0.0313921	3.8241	1.93512	0.00573283	2.24163	1	P68369	TBA1A_MOUSE	Tubulin alpha-1A chain (Alpha-tubulin 1) (Alpha-tubulin isotype M-alpha-1) (Tubulin alpha-1 chain) [Cleaved into: Detyrosinated tubulin alpha-1A chain]	Tuba1a Tuba1	PLATYAPVISAEKAYHEQLSVAEITNACFE	EKAYHEQLSVAEITNACFEPANQMVKCDPR	Y	H	E	T	N	A	1	0	1	0	0	1	2	0	1	1	1	0	0	0	0	1	1	0	0	1	0	0	11		1239.61
pep2268	HGIDPTGSYHGDSDLQLE	0.0163702	0.00614549	0.0249109	0.0558716	0.0815897	0.0529776	4.01545	2.00556	0.0108047	1.96639	1	Q7TMM9	TBB2A_MOUSE	Tubulin beta-2A chain	Tubb2a Tubb2	GNQIGAKFWEVISDEHGIDPTGSYHGDSDL	DPTGSYHGDSDLQLERINVYYNEAAGNKYV	E	H	G	L	E	R	0	0	0	3	0	1	1	3	2	1	2	0	0	0	1	2	1	0	1	0	0	0	18		1939.85
pep2288	HHPADFTPAVH	0.0904309	0.0244707	0.0918423	0.153491	0.165919	0.219839	2.60829	1.38311	0.0212618	1.6724	1	P01942	HBA_MOUSE	Hemoglobin subunit alpha (Alpha-globin) (Hemoglobin alpha chain)	Hba Hba-a1	NFKLLSHCLLVTLASHHPADFTPAVHASLD	TLASHHPADFTPAVHASLDKFLASVSTVLT	S	H	H	V	H	A	2	0	0	1	0	0	0	0	3	0	0	0	0	1	2	0	1	0	0	1	0	0	11		1227.58
pep2346	HQSGFSLSGAQIDDNIPRRTTQ	0.309848	0.196891	0.37049	0.114648	0.149075	0.169188	0.493499	-1.01888	0.0498861	1.30202	-1	O08553	DPYL2_MOUSE	Dihydropyrimidinase-related protein 2 (DRP-2) (Unc-33-like phosphoprotein 2) (ULIP-2)	Dpysl2 Crmp2 Ulip2	KTSPAKQQAPPVRNLHQSGFSLSGAQIDDN	SGAQIDDNIPRRTTQRIVAPPGGRANITSL	L	H	Q	T	Q	R	1	2	1	2	0	3	0	2	1	2	1	0	0	1	1	3	2	0	0	0	0	0	22		2427.19
pep2354	HRDTGILDSIGRFFSG	0.0162766	0.00611033	0.0045866	0.0187155	0.019211	0.0213645	2.19812	1.13627	0.0456327	1.34072	1	P04370	MBP_MOUSE	Myelin basic protein (MBP) (Myelin A1 protein)	Mbp Shi	TASTMDHARHGFLPRHRDTGILDSIGRFFS	RDTGILDSIGRFFSGDRGAPKRGSGKDSHT	R	H	R	S	G	D	0	2	0	2	0	0	0	3	1	2	1	0	0	2	0	2	1	0	0	0	0	0	16		1776.89
pep2372	HSRMVIPGGIDVHTR	0.00585298	0.0109862	0.0082466	0.0260749	0.0299314	0.0437071	3.97489	1.99092	0.010995	1.95881	1	O08553	DPYL2_MOUSE	Dihydropyrimidinase-related protein 2 (DRP-2) (Unc-33-like phosphoprotein 2) (ULIP-2)	Dpysl2 Crmp2 Ulip2	GENLIVPGGVKTIEAHSRMVIPGGIDVHTR	HSRMVIPGGIDVHTRFQMPDQGMTSADDFF	A	H	S	T	R	F	0	2	0	1	0	0	0	2	2	2	0	0	1	0	1	1	1	0	0	2	0	0	15		1673.88
pep2381	HTPFLDEL	0.0286931	0.0107716	0.00808547	0.0963835	0.0630783	0.0560822	4.53298	2.18046	0.0161887	1.79079	1	Q9DB77	QCR2_MOUSE	Cytochrome b-c1 complex subunit 2, mitochondrial (Complex III subunit 2) (Core protein II) (Ubiquinol-cytochrome-c reductase complex core protein 2)	Uqcrc2	FVSGKKSMAASGNLGHTPFLDEL_______	AASGNLGHTPFLDEL_______________	G	H	T	E	L	-	0	0	0	1	0	0	1	0	1	0	2	0	0	1	1	0	1	0	0	0	0	0	8		970.476
pep2433	IEGRAPVISGVTKA	0.00751116	0.0140987	0.0105829	0.0887235	0.0367474	0.0918062	6.74925	2.75473	0.0264227	1.57802	1	Q7TQD2	TPPP_MOUSE	Tubulin polymerization-promoting protein (TPPP) (EC 3.6.5.-) (25 kDa brain-specific protein) (TPPP/p25) (p25-alpha)	Tppp	KDKSSEEAVREVHRLIEGRAPVISGVTKAV	LIEGRAPVISGVTKAVSSPTVSRLTDTSKF	L	I	E	K	A	V	2	1	0	0	0	0	1	2	0	2	0	1	0	0	1	1	1	0	0	2	0	0	14		1396.8
pep2461	IGSLDNITHVPGGGN	0.00469418	0.00881113	0.0066139	0.0219429	0.0229656	0.0230656	3.37857	1.75641	0.000212057	3.67355	1	P10637	TAU_MOUSE	Microtubule-associated protein tau (Neurofibrillary tangle protein) (Paired helical filament-tau) (PHF-tau)	Mapt Mtapt Tau	VKSEKLDFKDRVQSKIGSLDNITHVPGGGN	IGSLDNITHVPGGGNKKIETHKLTFRENAK	K	I	G	G	N	K	0	0	2	1	0	0	0	4	1	2	1	0	0	0	1	1	1	0	0	1	0	0	15		1449.72
pep2487	ILDSIGRFFSGDRGAPKRGSG	0.031133	0.0584376	0.0438651	0.284722	0.176823	0.123299	4.38297	2.13191	0.0352946	1.45229	1	P04370	MBP_MOUSE	Myelin basic protein (MBP) (Myelin A1 protein)	Mbp Shi	DHARHGFLPRHRDTGILDSIGRFFSGDRGA	RFFSGDRGAPKRGSGKDSHTRTTHYGSLPQ	G	I	L	S	G	K	1	3	0	2	0	0	0	5	0	2	1	1	0	2	1	3	0	0	0	0	0	0	21		2192.14
pep2518	IPLDDPGANAAAAKIQASFRGHMA	0.00613602	0.0115175	0.00864539	0.0273358	0.0577935	0.0446923	4.93638	2.30345	0.0182617	1.73846	1	P60761	NEUG_MOUSE	Neurogranin (Ng) (RC3) [Cleaved into: NEUG(55-78)]	Nrgn	CTESACSKPDDDILDIPLDDPGANAAAAKI	AAAAKIQASFRGHMARKKIKSGECGRKGPG	D	I	P	M	A	R	7	1	1	2	0	1	0	2	1	2	1	1	1	1	2	1	0	0	0	0	0	0	24		2421.22
pep2533	IREEYPDRIM	0.00778023	0.0146037	0.010962	0.042111	0.0380637	0.0396763	3.59417	1.84566	0.00023116	3.63609	1	P68372	TBB4B_MOUSE	Tubulin beta-4B chain (Tubulin beta-2C chain)	Tubb4b Tubb2c	GGGTGSGMGTLLISKIREEYPDRIMNTFSV	LLISKIREEYPDRIMNTFSVVPSPKVSDTV	K	I	R	I	M	N	0	2	0	1	0	0	2	0	0	2	0	0	1	0	1	0	0	0	1	0	0	0	10		1320.65
pep2553	ITAFNDGLNHLDSLKGTFA	0.00804741	0.0151052	0.0113385	0.035851	0.066734	0.0569613	4.62573	2.20968	0.0111279	1.95359	1	P02088	HBB1_MOUSE	Hemoglobin subunit beta-1 (Beta-1-globin) (Hemoglobin beta-1 chain) (Hemoglobin beta-major chain)	Hbb-b1	AIMGNAKVKAHGKKVITAFNDGLNHLDSLK	NDGLNHLDSLKGTFASLSELHCDKLHVDPE	V	I	T	F	A	S	2	0	2	2	0	0	0	2	1	1	3	1	0	2	0	1	2	0	0	0	0	0	19		2033.02
pep2585	IYEKPQTEAPQVTGPIEVPVVRT	0.00271719	0.00510025	0.0038284	0.0271963	0.0132935	0.0239388	5.53233	2.46789	0.0144254	1.84087	1	Q9DCT8	CRIP2_MOUSE	Cysteine-rich protein 2 (CRP-2) (Heart LIM protein)	Crip2 Crp2 Hlp	LFGPKGVNIGGAGSYIYEKPQTEAPQVTGP	APQVTGPIEVPVVRTEERKTSGPPKGPSKA	Y	I	Y	R	T	E	1	1	0	0	0	2	3	1	0	2	0	1	0	0	4	0	3	0	1	4	0	0	23		2550.37
pep2620	KDYAVSTVPVADSL	0.00525133	0.00985692	0.0073989	0.0233945	0.0339968	0.0298418	3.8758	1.95449	0.00302067	2.5199	1	Q9CWS0	DDAH1_MOUSE	N(G),N(G)-dimethylarginine dimethylaminohydrolase 1 (DDAH-1) (Dimethylarginine dimethylaminohydrolase 1) (EC 3.5.3.18) (DDAHI) (Dimethylargininase-1)	Ddah1	KRTNQRGAEILADTFKDYAVSTVPVADSLH	FKDYAVSTVPVADSLHLKSFCSMAGPNLIA	F	K	D	S	L	H	2	0	0	2	0	0	0	0	0	0	1	1	0	0	1	2	1	0	1	3	0	0	14		1463.75
pep2650	KGFGYAEFEDLDSLLSAL	0.034947	0.0382686	0.0279646	0.00353684	0.00388409	0.0031442	0.104419	-3.25954	0.000579084	3.23726	-1	Q8BGD9	IF4B_MOUSE	Eukaryotic translation initiation factor 4B (eIF-4B)	Eif4b	SAVRLPREPSNPDRLKGFGYAEFEDLDSLL	GYAEFEDLDSLLSALSLNEESLGNRRIRVD	L	K	G	A	L	S	2	0	0	2	0	0	2	2	0	0	4	1	0	2	0	2	0	0	1	0	0	0	18		1973.96
pep2666	KGNDISSGTVLSDYV	0.061052	0.0479881	0.0333278	0.00421516	0.00462901	0.0261313	0.245669	-2.02521	0.0294739	1.53056	-1	P70296	PEBP1_MOUSE	Phosphatidylethanolamine-binding protein 1 (PEBP-1) (HCNPpp) [Cleaved into: Hippocampal cholinergic neurostimulating peptide (HCNP)]	Pebp1 Pbp Pebp	DPKFREWHHFLVVNMKGNDISSGTVLSDYV	KGNDISSGTVLSDYVGSGPPSGTGLHRYVW	M	K	G	Y	V	G	0	0	1	2	0	0	0	2	0	1	1	1	0	0	0	3	1	0	1	2	0	0	15		1553.76
pep2685	KHTGPGILSMANAGPNTNGSQFF	0.0504827	0.0189515	0.0142256	0.0567943	0.064751	0.0719503	2.31289	1.20969	0.0398341	1.39974	1	P17742	PPIA_MOUSE	Peptidyl-prolyl cis-trans isomerase A (PPIase A) (EC 5.2.1.8) (Cyclophilin A) (Cyclosporin A-binding protein) (Rotamase A) (SP18) [Cleaved into: Peptidyl-prolyl cis-trans isomerase A, N-terminally processed]	Ppia	RSIYGEKFEDENFILKHTGPGILSMANAGP	SMANAGPNTNGSQFFICTAKTEWLDGKHVV	L	K	H	F	F	I	2	0	3	0	0	1	0	4	1	1	1	1	1	2	2	2	2	0	0	0	0	0	23		2345.12
pep2716	KMIYASSKDAIK	0.0599321	0.077498	0.119873	0.0191186	0.00419914	0.00339923	0.103835	-3.26764	0.014233	1.8467	-1	P18760	COF1_MOUSE	Cofilin-1 (Cofilin, non-muscle isoform)	Cfl1	LVFIFWAPENAPLKSKMIYASSKDAIKKKL	LKSKMIYASSKDAIKKKLTGIKHELQANCY	S	K	M	I	K	K	2	0	0	1	0	0	0	0	0	2	0	3	1	0	0	2	0	0	1	0	0	0	12		1353.73
pep2735	KPFPWGDGNHT	0.00326126	0.00612149	0.00459498	0.0249941	0.0159553	0.0304596	5.10877	2.35298	0.0113113	1.94649	1	P43024	CX6A1_MOUSE	Cytochrome c oxidase subunit 6A1, mitochondrial (Cytochrome c oxidase polypeptide VIa-liver)	Cox6a1 Cox6al	ERPPFVAYPHLRIRTKPFPWGDGNHTLFHN	RIRTKPFPWGDGNHTLFHNPHVNPLPTGYE	T	K	P	H	T	L	0	0	1	1	0	0	0	2	1	0	0	1	0	1	2	0	1	1	0	0	0	0	11		1254.58
pep2813	KTEWLDGKHVVFGK	0.00479328	0.00899715	0.00675353	0.0297843	0.0234505	0.0265065	3.8815	1.95661	0.000848025	3.07159	1	P17742	PPIA_MOUSE	Peptidyl-prolyl cis-trans isomerase A (PPIase A) (EC 5.2.1.8) (Cyclophilin A) (Cyclosporin A-binding protein) (Rotamase A) (SP18) [Cleaved into: Peptidyl-prolyl cis-trans isomerase A, N-terminally processed]	Ppia	AGPNTNGSQFFICTAKTEWLDGKHVVFGKV	AKTEWLDGKHVVFGKVKEGMNIVEAMERFG	A	K	T	G	K	V	0	0	0	1	0	0	1	2	1	0	1	3	0	1	0	0	1	1	0	2	0	0	14		1642.88
pep2829	KVAFSAVRSTN	0.047918	0.0657342	0.0762106	0.00624058	0.00685328	0.00554778	0.0981848	-3.34836	0.0023088	2.63661	-1	Q8BME9	CBLN4_MOUSE	Cerebellin-4 (Cerebellin-like glycoprotein 1)	Cbln4 Cblnl1	SSSSPLGISVRAANSKVAFSAVRSTNHEPS	AANSKVAFSAVRSTNHEPSEMSNKTRIIYF	S	K	V	T	N	H	2	1	1	0	0	0	0	0	0	0	0	1	0	1	0	2	1	0	0	2	0	0	11		1178.64
pep2857	KVPRPEDTLTYADLDMVHLS	0.00464265	0.0087144	0.00654129	0.0265009	0.0227135	0.0244185	3.70046	1.8877	0.000368907	3.43308	1	P97797	SHPS1_MOUSE	Tyrosine-protein phosphatase non-receptor type substrate 1 (SHP substrate 1) (SHPS-1) (Brain Ig-like molecule with tyrosine-based activation motifs) (Bit) (CD172 antigen-like family member A) (Inhibitory receptor SHPS-1) (MyD-1 antigen) (Signal-regulatory protein alpha-1) (Sirp-alpha-1) (mSIRP-alpha1) (p84) (CD antigen CD172a)	Sirpa Bit Myd1 Ptpns1 Shps1 Sirp	PEPNNHTEYASIETGKVPRPEDTLTYADLD	EDTLTYADLDMVHLSRAQPAPKPEPSFSEY	G	K	V	L	S	R	1	1	0	3	0	0	1	0	1	0	3	1	1	0	2	1	2	0	1	2	0	0	20		2299.15
pep2885	LADPTGAFGKATDL	0.0535004	0.06112	0.0406626	0.00507034	0.0278408	0.0231064	0.360744	-1.47095	0.0224458	1.64887	-1	P99029	PRDX5_MOUSE	Peroxiredoxin-5, mitochondrial (EC 1.11.1.24) (Antioxidant enzyme B166) (AOEB166) (Liver tissue 2D-page spot 2D-0014IV) (PLP) (Peroxiredoxin V) (Prx-V) (Peroxisomal antioxidant enzyme) (Thioredoxin peroxidase PMP20) (Thioredoxin-dependent peroxiredoxin 5)	Prdx5 Prdx6	EEWGRAHQAEGKVRLLADPTGAFGKATDLL	LLADPTGAFGKATDLLLDDSLVSLFGNRRL	L	L	A	D	L	L	3	0	0	2	0	0	0	2	0	0	2	1	0	1	1	0	2	0	0	0	0	0	14		1375.7
pep2928	LDKADIAVPLVFTK	0.00422275	0.00792624	0.00594967	0.036096	0.0206592	0.0168792	4.0685	2.0245	0.0362715	1.44043	1	Q7TSJ2	MAP6_MOUSE	Microtubule-associated protein 6 (MAP-6) (Stable tubule-only polypeptide) (STOP)	Map6 Mtap6	PCITRACCIARFWNQLDKADIAVPLVFTKY	QLDKADIAVPLVFTKYSEATEHPGAPPQPP	Q	L	D	T	K	Y	2	0	0	2	0	0	0	0	0	1	2	2	0	1	1	0	1	0	0	2	0	0	14		1528.89
pep2954	LEDLKSFVKNQ	0.0204042	0.0373134	0.00560171	0.0593815	0.0539584	0.0856598	3.1428	1.65205	0.0279584	1.55349	1	O35658	C1QBP_MOUSE	Complement component 1 Q subcomponent-binding protein, mitochondrial (GC1q-R protein) (Glycoprotein gC1qBP) (C1qBP)	C1qbp Gc1qbp	VELSTALEHQEYITFLEDLKSFVKNQ____	YITFLEDLKSFVKNQ_______________	F	L	E	N	Q	-	0	0	1	1	0	1	1	0	0	0	2	2	0	1	0	1	0	0	0	1	0	0	11		1319.71
pep2965	LENPKKYIPGTK	0.00515243	0.00967128	0.0362978	0.164524	0.0832527	0.168396	8.14086	3.02518	0.0144054	1.84147	1	P62897	CYC_MOUSE	Cytochrome c, somatic	Cycs	KNKGITWGEDTLMEYLENPKKYIPGTKMIF	MEYLENPKKYIPGTKMIFAGIKKKGERADL	Y	L	E	T	K	M	0	0	1	0	0	0	1	1	0	1	1	3	0	0	2	0	1	0	1	0	0	0	12		1386.79
pep3051	LLDEGHYPV	0.203863	0.314231	0.358482	0.132825	0.116785	0.136043	0.439953	-1.18458	0.024233	1.61559	-1	P16014	SCG1_MOUSE	Secretogranin-1 (Chromogranin-B) (CgB) (Secretogranin I) (SgI) [Cleaved into: CCB peptide; PE-11]	Chgb Scg-1 Scg1	EPGAHSALDTREEKRLLDEGHYPVRESPID	TREEKRLLDEGHYPVRESPIDTAKRYPQSK	R	L	L	P	V	R	0	0	0	1	0	0	1	1	1	0	2	0	0	0	1	0	0	0	1	1	0	0	9		1041.51
pep3112	LPGPLQDM	0.166418	0.213754	0.297393	0.452006	0.775752	0.607331	2.70836	1.43742	0.0187875	1.72613	1	P63040	CPLX1_MOUSE	Complexin-1 (921-S) (Complexin I) (CPX I) (Synaphin-2)	Cplx1	PEEEDESILDTVIKYLPGPLQDMFKK____	LDTVIKYLPGPLQDMFKK____________	Y	L	P	D	M	F	0	0	0	1	0	1	0	1	0	0	2	0	1	0	2	0	0	0	0	0	0	0	8		869.432
pep3190	LSPSPTPATQSPKKPPA	0.0500219	0.0187785	0.0140957	0.14784	0.106409	0.127891	4.60986	2.20472	0.00372641	2.42871	1	Q61548	AP180_MOUSE	Clathrin coat assembly protein AP180 (91 kDa synaptosomal-associated protein) (Clathrin coat-associated protein AP180) (Phosphoprotein F1-20)	Snap91	MMRPPFGAAAVPGTQLSPSPTPATQSPKKP	PSPTPATQSPKKPPAKDPLADLNIKDFL__	Q	L	S	P	A	K	2	0	0	0	0	1	0	0	0	0	1	2	0	0	6	3	2	0	0	0	0	0	17		1702.93
pep3197	LSRAQPAPKPEPSFSEYASVQ	0.00852181	0.0159957	0.0120069	0.0393353	0.0416918	0.0365988	3.22048	1.68727	0.000492574	3.30753	1	P97797	SHPS1_MOUSE	Tyrosine-protein phosphatase non-receptor type substrate 1 (SHP substrate 1) (SHPS-1) (Brain Ig-like molecule with tyrosine-based activation motifs) (Bit) (CD172 antigen-like family member A) (Inhibitory receptor SHPS-1) (MyD-1 antigen) (Signal-regulatory protein alpha-1) (Sirp-alpha-1) (mSIRP-alpha1) (p84) (CD antigen CD172a)	Sirpa Bit Myd1 Ptpns1 Shps1 Sirp	RPEDTLTYADLDMVHLSRAQPAPKPEPSFS	APKPEPSFSEYASVQVQRK___________	H	L	S	V	Q	V	3	1	0	0	0	2	2	0	0	0	1	1	0	1	4	4	0	0	1	1	0	0	21		2288.14
pep3236	LVGYDLVPEPKIIDAALRA	0.093731	0.0258844	0.0971482	0.260082	0.180256	0.216326	3.0294	1.59903	0.0109879	1.95909	1	P12787	COX5A_MOUSE	Cytochrome c oxidase subunit 5A, mitochondrial (Cytochrome c oxidase polypeptide Va)	Cox5a	KPDIDAWELRKGMNTLVGYDLVPEPKIIDA	DLVPEPKIIDAALRACRRLNDFASAVRILE	T	L	V	R	A	C	3	1	0	2	0	0	1	1	0	2	3	1	0	0	2	0	0	0	1	2	0	0	19		2052.16
pep3241	LVPEPKIIDAALRA	0.036159	0.010031	0.037648	0.0735359	0.0711704	0.120732	3.16609	1.6627	0.0305488	1.51501	1	P12787	COX5A_MOUSE	Cytochrome c oxidase subunit 5A, mitochondrial (Cytochrome c oxidase polypeptide Va)	Cox5a	AWELRKGMNTLVGYDLVPEPKIIDAALRAC	DLVPEPKIIDAALRACRRLNDFASAVRILE	D	L	V	R	A	C	3	1	0	1	0	0	1	0	0	2	2	1	0	0	2	0	0	0	0	1	0	0	14		1504.9
pep3249	LVYDQELLGPSDKSEAAL	0.00896044	0.016819	0.0126249	0.0495008	0.0565959	0.0354869	3.68666	1.88231	0.00648183	2.1883	1	Q8R404	MIC13_MOUSE	MICOS complex subunit MIC13	Micos13 Mic13 Qil1	MRFLIKGSVAGGAVYLVYDQELLGPSDKSE	DQELLGPSDKSEAALRKAEEVVPPAMYQFS	Y	L	V	A	L	R	2	0	0	2	0	1	2	1	0	0	4	1	0	0	1	2	0	0	1	1	0	0	18		1946.98
pep3309	MDQLAKELTAE	0.0292015	0.0301322	0.0519281	0.00286064	0.0031415	0.00254307	0.0768028	-3.7027	0.00995659	2.00189	-1	P26339	CMGA_MOUSE	Chromogranin-A (CgA) [Cleaved into: Pancreastatin; Beta-granin; WE-14; Catestatin; GE-25; Serpinin-RRG; Serpinin (AL26); p-Glu serpinin precursor]	Chga	EERLSREWEDKRWSRMDQLAKELTAEKRLE	RWSRMDQLAKELTAEKRLEGEDDPDRSMKL	R	M	D	A	E	K	2	0	0	1	0	1	2	0	0	0	2	1	1	0	0	0	1	0	0	0	0	0	11		1247.61
pep3332	MDVFMKGLSKAKEGVVAAAEKTKQG	0.0816752	0.0158962	0.0596608	0.21108	0.209424	0.119476	3.43429	1.78001	0.0237377	1.62456	1	O55042	SYUA_MOUSE	Alpha-synuclein (Non-A beta component of AD amyloid) (Non-A4 component of amyloid precursor) (NACP)	Snca Syn	______________________________	AKEGVVAAAEKTKQGVAEAAGKTKEGVLYV	-	M	D	Q	G	V	4	0	0	1	0	1	2	3	0	0	1	5	2	1	0	1	1	0	0	3	0	0	25		2622.39
pep3401	MEPSLATGGSETTRLVSARDR	0.00543884	0.0102089	0.00766309	0.0242299	0.0403439	0.0563294	5.18658	2.37478	0.0255268	1.593	1	P97441	ZNT3_MOUSE	Zinc transporter 3 (ZnT-3) (Solute carrier family 30 member 3)	Slc30a3 Znt3	______________________________	TGGSETTRLVSARDRSSAGGGLRLKSLFTE	-	M	E	D	R	S	2	3	0	1	0	0	2	2	0	0	2	0	1	0	1	3	3	0	0	1	0	0	21		2233.11
pep3408	MESMLNKLKSTVTK	0.00454117	0.00852392	0.00639831	0.0251314	0.0240221	0.0179848	3.44947	1.78637	0.00314312	2.50264	1	Q8CFE4	SCYL2_MOUSE	SCY1-like protein 2 (Coated vesicle-associated kinase of 104 kDa)	Scyl2 Cvak104 D10Ertd802e	______________________________	______________________________	-	M	E	T	K	V	0	0	1	0	0	0	1	0	0	0	2	3	2	0	0	2	2	0	0	1	0	0	14		1608.86
pep3414	MESVKQRILAPGKEGIKNFAG	0.0176432	0.0331168	0.0248585	0.109611	0.0863169	0.196451	5.18892	2.37543	0.0354175	1.45078	1	Q8BLE7	VGLU2_MOUSE	Vesicular glutamate transporter 2 (VGluT2) (Differentiation-associated BNPI) (Differentiation-associated Na(+)-dependent inorganic phosphate cotransporter) (Solute carrier family 17 member 6)	Slc17a6 Dnpi Vglut2	______________________________	RILAPGKEGIKNFAGKSLGQIYRVLEKKQD	-	M	E	A	G	K	2	1	1	0	0	1	2	3	0	2	1	3	1	1	1	1	0	0	0	1	0	0	21		2272.24
pep3435	MGNEIDTQNR	0.00585863	0.0549842	0.00825456	0.104662	0.139058	0.0947498	4.89844	2.29232	0.0126419	1.89819	1	P60879	SNP25_MOUSE	Synaptosomal-associated protein 25 (SNAP-25) (Super protein) (SUP) (Synaptosomal-associated 25 kDa protein)	Snap25 Snap	QVSGIIGNLRHMALDMGNEIDTQNRQIDRI	HMALDMGNEIDTQNRQIDRIMEKADSNKTR	D	M	G	N	R	Q	0	1	2	1	0	1	1	1	0	1	0	0	1	0	0	0	1	0	0	0	0	0	10		1176.52
pep3462	MIQNVGNHLR	0.00397192	0.00745543	0.00559627	0.0176948	0.0317554	0.0232331	4.26956	2.09409	0.0116406	1.93403	1	Q8VHQ9	ACO11_MOUSE	Acyl-coenzyme A thioesterase 11 (Acyl-CoA thioesterase 11) (EC 3.1.2.-) (Acyl-CoA thioester hydrolase 11) (Adipose-associated thioesterase) (Brown fat-inducible thioesterase) (BFIT) (Palmitoyl-coenzyme A thioesterase) (EC 3.1.2.2)	Acot11 Bfit Thea	______________________________	______________________________	-	M	I	L	R	R	0	1	2	0	0	1	0	1	1	1	1	0	1	0	0	0	0	0	0	1	0	0	10		1180.61
pep3504	MNAANVGWNGSTFA	0.0101937	0.0191338	0.0143624	0.0611431	0.0498711	0.0901224	4.60373	2.2028	0.0128524	1.89102	1	P34884	MIF_MOUSE	Macrophage migration inhibitory factor (MIF) (EC 5.3.2.1) (Delayed early response protein 6) (DER6) (Glycosylation-inhibiting factor) (GIF) (L-dopachrome isomerase) (L-dopachrome tautomerase) (EC 5.3.3.12) (Phenylpyruvate tautomerase)	Mif	RLHISPDRVYINYYDMNAANVGWNGSTFA_	DMNAANVGWNGSTFA_______________	D	M	N	F	A	-	3	0	3	0	0	0	0	2	0	0	0	0	1	1	0	1	1	1	0	1	0	0	14		1438.63
pep3516	MNNQKQQKPTLS	0.00864063	0.0162187	0.0121743	0.0432015	0.0513742	0.0342204	3.47781	1.79818	0.00484103	2.31506	1	Q9CQC6	BZW1_MOUSE	Basic leucine zipper and W2 domain-containing protein 1	Bzw1	______________________________	______________________________	-	M	N	L	S	G	0	0	2	0	0	3	0	0	0	0	1	2	1	0	1	1	1	0	0	0	0	0	12		1415.72
pep3519	MNQEKLAKLQA	0.00561117	0.0105324	0.0079059	0.0262228	0.0274519	0.0401787	3.90252	1.96441	0.00765503	2.11605	1	Q9CQH7	BT3L4_MOUSE	Transcription factor BTF3 homolog 4 (Basic transcription factor 3-like 4)	Btf3l4	______________________________	______________________________	-	M	N	Q	A	Q	2	0	1	0	0	2	1	0	0	0	2	2	1	0	0	0	0	0	0	0	0	0	11		1272.69
pep3643	NDRTIEGDFLWSDGAPLLYE	0.0305191	0.036029	0.033864	0.00342046	0.00375629	0.00304074	0.101756	-3.29682	4.91261e-05	4.30869	-1	Q61361	PGCB_MOUSE	Brevican core protein	Bcan	DFVNDRYREYQWIGLNDRTIEGDFLWSDGA	EGDFLWSDGAPLLYENWNPGQPDSYFLSGE	L	N	D	Y	E	N	1	1	1	3	0	0	2	2	0	1	3	0	0	1	1	1	1	1	1	0	0	0	20		2310.08
pep3755	NLQSLDPSHRISD	0.00400601	0.00751942	0.0056443	0.0178467	0.0285176	0.0205866	3.89936	1.96324	0.00779793	2.10802	1	P09240	CCKN_MOUSE	Cholecystokinin (CCK) [Cleaved into: Cholecystokinin-33 (CCK33); Cholecystokinin-12 (CCK12); Cholecystokinin-8 (CCK8)]	Cck	QQVRKAPSGRMSVLKNLQSLDPSHRISDRD	LKNLQSLDPSHRISDRDYMGWMDFGRRSAE	K	N	L	S	D	R	0	1	1	2	0	1	0	0	1	1	2	0	0	0	1	3	0	0	0	0	0	0	13		1480.73
pep3809	NQLDKADIAVPLVF	0.0412841	0.0154983	0.0116335	0.0944011	0.094792	0.0499359	3.49523	1.80539	0.0316396	1.49977	1	Q7TSJ2	MAP6_MOUSE	Microtubule-associated protein 6 (MAP-6) (Stable tubule-only polypeptide) (STOP)	Map6 Mtap6	AWPCITRACCIARFWNQLDKADIAVPLVFT	WNQLDKADIAVPLVFTKYSEATEHPGAPPQ	W	N	Q	V	F	T	2	0	1	2	0	1	0	0	0	1	2	1	0	1	1	0	0	0	0	2	0	0	14		1541.85
pep3860	NVKQVDVPTLTGAF	0.00573327	0.0107615	0.00807793	0.0255415	0.034984	0.0373395	3.98267	1.99373	0.003271	2.48532	1	Q9D3D9	ATPD_MOUSE	ATP synthase subunit delta, mitochondrial (ATP synthase F1 subunit delta) (F-ATPase delta subunit)	Atp5f1d Atp5d	SFTFASPTQVFFDSANVKQVDVPTLTGAFG	ANVKQVDVPTLTGAFGILASHVPTLQVLRP	A	N	V	A	F	G	1	0	1	1	0	1	0	1	0	0	1	1	0	1	1	0	2	0	0	3	0	0	14		1487.8
pep3899	PAYHSSLMDPDTKLIG	0.034496	0.01295	0.00972069	0.0719289	0.088329	0.0766131	4.14351	2.05085	0.00284789	2.54548	1	Q9JM76	ARPC3_MOUSE	Actin-related protein 2/3 complex subunit 3 (Arp2/3 complex 21 kDa subunit) (p21-ARC)	Arpc3	______________________________	AYHSSLMDPDTKLIGNMALLPLRSQFKGPA	M	P	A	I	G	N	1	0	0	2	0	0	0	1	1	1	2	1	1	0	2	2	1	0	1	0	0	0	16		1743.85
pep3980	PGGLLLGDEAPNFEAN	0.00200207	0.00375794	0.00282082	0.00891915	0.015148	0.0114158	4.13514	2.04794	0.00883447	2.05382	1	O08709	PRDX6_MOUSE	Peroxiredoxin-6 (EC 1.11.1.27) (1-Cys peroxiredoxin) (1-Cys PRX) (Acidic calcium-independent phospholipase A2) (aiPLA2) (EC 3.1.1.4) (Antioxidant protein 2) (Glutathione-dependent peroxiredoxin) (Lysophosphatidylcholine acyltransferase 5) (LPC acyltransferase 5) (LPCAT-5) (Lyso-PC acyltransferase 5) (EC 2.3.1.23) (Non-selenium glutathione peroxidase) (NSGPx)	Prdx6 Aop2 Ltw4 Prdx5	______________________________	GGLLLGDEAPNFEANTTIGRIRFHDFLGDS	M	P	G	A	N	T	2	0	2	1	0	0	2	3	0	0	3	0	0	1	2	0	0	0	0	0	0	0	16		1612.77
pep4013	PHLRIRTKPFPWGDGNHTL	0.0321483	0.0120687	0.00905912	0.0768737	0.201662	0.143602	7.92358	2.98615	0.0287403	1.54151	1	P43024	CX6A1_MOUSE	Cytochrome c oxidase subunit 6A1, mitochondrial (Cytochrome c oxidase polypeptide VIa-liver)	Cox6a1 Cox6al	KSRHEEHERPPFVAYPHLRIRTKPFPWGDG	IRTKPFPWGDGNHTLFHNPHVNPLPTGYED	Y	P	H	T	L	F	0	2	1	1	0	0	0	2	2	1	2	1	0	1	3	0	2	1	0	0	0	0	19		2241.19
pep4170	PSGFTLDDAIQTGVDNPGHPYIMTV	0.00746825	0.0140182	0.0105224	0.0332709	0.0415556	0.0358782	3.45856	1.79017	0.00105859	2.97527	1	Q04447	KCRB_MOUSE	Creatine kinase B-type (EC 2.7.3.2) (B-CK) (Creatine kinase B chain) (Creatine phosphokinase B-type) (CPK-B)	Ckb Ckbb	VLTPELYAELRAKCTPSGFTLDDAIQTGVD	QTGVDNPGHPYIMTVGAVAGDEESYDVFKD	T	P	S	T	V	G	1	0	1	3	0	1	0	3	1	2	1	0	1	1	3	1	3	0	1	2	0	0	25		2644.25
pep4186	PSVTQVTR	0.0107764	0.0202276	0.0151835	0.0886926	0.052722	0.0430164	3.99309	1.99751	0.0312411	1.50527	1	Q8K021	SCAM1_MOUSE	Secretory carrier-associated membrane protein 1 (Secretory carrier membrane protein 1)	Scamp1	SNPFADPDLNNPFKDPSVTQVTRNVPPGLD	LNNPFKDPSVTQVTRNVPPGLDEYNPFSDS	D	P	S	T	R	N	0	1	0	0	0	1	0	0	0	0	0	0	0	0	1	1	2	0	0	2	0	0	8		886.487
pep4218	PVLPGAYQQSHSQGYGY	0.0101183	0.0189925	0.0142563	0.045077	0.0505305	0.0603132	3.59536	1.84614	0.00187564	2.72685	1	Q9DC07	LNEBL_MOUSE	LIM zinc-binding domain-containing Nebulette (Actin-binding Z-disk protein)	Nebl Lnebl	PHVVEMDRRPGIIVAPVLPGAYQQSHSQGY	LPGAYQQSHSQGYGYMHQTSVSSMRSMQPP	A	P	V	G	Y	M	1	0	0	0	0	3	0	3	1	0	1	0	0	0	2	2	0	0	3	1	0	0	17		1850.86
pep4351	RAAVPSGASTGIYEA	0.00523439	0.00982511	0.00737503	0.0292682	0.0256085	0.0266486	3.63392	1.86153	0.000328752	3.48313	1	P17183	ENOG_MOUSE	Gamma-enolase (EC 4.2.1.11) (2-phospho-D-glycerate hydro-lyase) (Enolase 2) (Neural enolase) (Neuron-specific enolase) (NSE)	Eno2 Eno-2	NPTVEVDLYTAKGLFRAAVPSGASTGIYEA	RAAVPSGASTGIYEALELRDGDKQRYLGKG	F	R	A	E	A	L	4	1	0	0	0	0	1	2	0	1	0	0	0	0	1	2	1	0	1	1	0	0	15		1448.73
pep4362	RALQDILDFTGPPAFPK	0.00250848	0.00470849	0.00353434	0.0214312	0.0128848	0.00993458	4.11583	2.04118	0.0333615	1.47675	1	A2AG50	MA7D2_MOUSE	MAP7 domain-containing protein 2	Map7d2 Mtap7d2	MIPGMSLDQNGTGNARALQDILDFTGPPAF	LQDILDFTGPPAFPKKSSENLSLDDCNKNL	A	R	A	P	K	K	2	1	0	2	0	1	0	1	0	1	2	1	0	2	3	0	1	0	0	0	0	0	17		1885.01
pep4374	RAPSFHDKYGNAILA	0.117704	0.123321	0.157699	0.593638	0.517087	0.438955	3.8866	1.95851	0.00116473	2.93377	1	P56393	COX7B_MOUSE	Cytochrome c oxidase subunit 7B, mitochondrial (Cytochrome c oxidase polypeptide VIIb)	Cox7b	VRSIQQVVARQSHQKRAPSFHDKYGNAILA	RAPSFHDKYGNAILAGGAIFCVSTWTYTAT	K	R	A	L	A	G	3	1	1	1	0	0	0	1	1	1	1	1	0	1	1	1	0	0	1	0	0	0	15		1658.85
pep4384	RATSNVFAMFDQSQIQEF	0.132391	0.110151	0.0835203	0.0225442	0.035799	0.0556858	0.349716	-1.51574	0.0144484	1.84018	-1	Q9CQ19	MYL9_MOUSE	Myosin regulatory light polypeptide 9 (Myosin regulatory light chain 2, smooth muscle isoform) (Myosin regulatory light chain 9)	Myl9 Myrl2	SSKRAKAKTTKKRPQRATSNVFAMFDQSQI	SNVFAMFDQSQIQEFKEAFNMIDQNRDGFI	Q	R	A	E	F	K	2	1	1	1	0	3	1	0	0	1	0	0	1	3	0	2	1	0	0	1	0	0	18		2117.98
pep4389	RAWPLPRRGDHPWIPKPVQIPATS	0.0113898	0.0213791	0.0160478	0.0526531	0.0557232	0.0597244	3.44351	1.78388	0.000357165	3.44713	1	Q7TSJ2	MAP6_MOUSE	Microtubule-associated protein 6 (MAP-6) (Stable tubule-only polypeptide) (STOP)	Map6 Mtap6	SDAPFERETQYQKDFRAWPLPRRGDHPWIP	DHPWIPKPVQIPATSQPSQPVLGVPKRRPQ	F	R	A	T	S	Q	2	3	0	1	0	1	0	1	1	2	1	1	0	0	6	1	1	2	0	1	0	0	24		2774.52
pep4410	RDTGILDSIGRFFSGDR	0.901138	0.4147	0.55518	1.41986	1.29759	1.05472	2.01611	1.01157	0.024442	1.61186	1	P04370	MBP_MOUSE	Myelin basic protein (MBP) (Myelin A1 protein)	Mbp Shi	ASTMDHARHGFLPRHRDTGILDSIGRFFSG	TGILDSIGRFFSGDRGAPKRGSGKDSHTRT	H	R	D	D	R	G	0	3	0	3	0	0	0	3	0	2	1	0	0	2	0	2	1	0	0	0	0	0	17		1910.96
pep4468	RHGFLPRHRDTGILDSIGR	0.019871	0.0372985	0.0279974	0.134154	0.0972162	0.136962	4.32482	2.11264	0.002365	2.62617	1	P04370	MBP_MOUSE	Myelin basic protein (MBP) (Myelin A1 protein)	Mbp Shi	QRSKYLATASTMDHARHGFLPRHRDTGILD	LPRHRDTGILDSIGRFFSGDRGAPKRGSGK	A	R	H	G	R	F	0	4	0	2	0	0	0	3	2	2	2	0	0	1	1	1	1	0	0	0	0	0	19		2202.19
pep4482	RHRDTGILDSIGRFF	0.0239654	0.00899677	0.0402654	0.0991472	0.0539293	0.0733123	3.09158	1.62834	0.0326116	1.48663	1	P04370	MBP_MOUSE	Myelin basic protein (MBP) (Myelin A1 protein)	Mbp Shi	ATASTMDHARHGFLPRHRDTGILDSIGRFF	RHRDTGILDSIGRFFSGDRGAPKRGSGKDS	P	R	H	F	F	S	0	3	0	2	0	0	0	2	1	2	1	0	0	2	0	1	1	0	0	0	0	0	15		1788.94
pep4536	RKFFVGGNWKMNGRKK	1.00505	1.03054	2.04776	0.436606	0.383517	0.189256	0.247194	-2.01628	0.0434682	1.36183	-1	P17751	TPIS_MOUSE	Triosephosphate isomerase (TIM) (EC 5.3.1.1) (Methylglyoxal synthase) (EC 4.2.3.3) (Triose-phosphate isomerase)	Tpi1 Tpi	______________________________	KFFVGGNWKMNGRKKCLGELICTLNAANVP	T	R	K	K	K	C	0	2	2	0	0	0	0	3	0	0	0	4	1	2	0	0	0	1	0	1	0	0	16		1952.07
pep4566	RLLLPGELAKHAVSEGTKAVTK	0.00440113	0.00826107	0.00620101	0.0461763	0.021532	0.0489978	6.18697	2.62923	0.0206785	1.68448	1	Q6ZWY9	H2B1C_MOUSE	Histone H2B type 1-C/E/G	H2bc4 Hist1h2bc; H2bc6 Hist1h2be; H2bc8 Hist1h2bg	NKRSTITSREIQTAVRLLLPGELAKHAVSE	LAKHAVSEGTKAVTKYTSSK__________	V	R	L	T	K	Y	3	1	0	0	0	0	2	2	1	0	4	3	0	0	1	1	2	0	0	2	0	0	22		2317.35
pep4570	RLLVVYPWTQR	0.0319793	0.0680092	0.0435816	0.00551202	0.00605319	0.0049001	0.114685	-3.12425	0.01629	1.78808	-1	P02088	HBB1_MOUSE	Hemoglobin subunit beta-1 (Beta-1-globin) (Hemoglobin beta-1 chain) (Hemoglobin beta-major chain)	Hbb-b1	WGKVNSDEVGGEALGRLLVVYPWTQRYFDS	EALGRLLVVYPWTQRYFDSFGDLSSASAIM	G	R	L	Q	R	Y	0	2	0	0	0	1	0	0	0	0	2	0	0	0	1	0	1	1	1	2	0	0	11		1429.82
pep4585	RLQEQEELENYIEHVLLHRP	0.0545112	0.0204639	0.0153608	0.105642	0.141138	0.11835	4.04191	2.01504	0.00470104	2.32781	1	Q0VGU4	VGF_MOUSE	Neurosecretory protein VGF [Cleaved into: Neuroendocrine regulatory peptide-1 (NERP-1); Neuroendocrine regulatory peptide-2 (NERP-2); VGF-derived peptide TLQP-21; VGF-derived peptide TLQP-62]	Vgf	AQARRAQEEADAEERRLQEQEELENYIEHV	EELENYIEHVLLHRP_______________	R	R	L	R	P	-	0	2	1	0	0	2	5	0	2	1	4	0	0	0	1	0	0	0	1	1	0	0	20		2544.31
pep4727	RTGDTGMLPANYVEAI	0.00469765	0.00881764	0.00661879	0.0213133	0.0229826	0.022476	3.31637	1.7296	0.000270829	3.5673	1	Q61792	LASP1_MOUSE	LIM and SH3 domain protein 1 (LASP-1) (Metastatic lymph node gene 50 protein) (MLN 50)	Lasp1 Mln50	NVQQIDDGWMYGTVERTGDTGMLPANYVEA	TGDTGMLPANYVEAI_______________	E	R	T	A	I	-	2	1	1	1	0	0	1	2	0	1	1	0	1	0	1	0	2	0	1	1	0	0	16		1706.83
pep4742	RTLAGNPKATPPQIVNGNH	0.0506661	0.062065	0.0593767	0.00589223	0.0434406	0.0052381	0.317075	-1.65711	0.0401886	1.3959	-1	Q91VW3	SH3L3_MOUSE	SH3 domain-binding glutamic acid-rich-like protein 3	Sh3bgrl3	QLVDISQDNALRDEMRTLAGNPKATPPQIV	GNPKATPPQIVNGNHYCGDYELFVEAVEQD	M	R	T	N	H	Y	2	1	3	0	0	1	0	2	1	1	1	1	0	0	3	0	2	0	0	1	0	0	19		1984.06
pep4749	RTQDENPVVHFFKNIV	0.0233827	0.00877802	0.00658905	0.0468297	0.0251232	0.0369411	2.81018	1.49066	0.0462431	1.33495	1	P04370	MBP_MOUSE	Myelin basic protein (MBP) (Myelin A1 protein)	Mbp Shi	RTTHYGSLPQKSQHGRTQDENPVVHFFKNI	TQDENPVVHFFKNIVTPRTPPPSQGKGGRD	G	R	T	I	V	T	0	1	2	1	0	1	1	0	1	1	0	1	0	2	1	0	1	0	0	3	0	0	16		1942.01
pep4845	SAPLVETSTPLR	0.00393446	0.00738511	0.00554349	0.0276095	0.0192488	0.0164224	3.75262	1.9079	0.0115429	1.93768	1	Q9QXV0	PCS1N_MOUSE	ProSAAS (IA-4) (Proprotein convertase subtilisin/kexin type 1 inhibitor) (Proprotein convertase 1 inhibitor) (pro-SAAS) [Cleaved into: KEP; Big SAAS (b-SAAS); Little SAAS (l-SAAS); Big PEN-LEN (b-PEN-LEN) (SAAS CT(1-49)); PEN; PEN-20; PEN-19; Little LEN (l-LEN); Big LEN (b-LEN) (SAAS CT(25-40))]	Pcsk1n	LSARPVKEPRSLSAASAPLVETSTPLRLRR	SAASAPLVETSTPLRLRRAVPRGEAAGAVQ	A	S	A	L	R	L	1	1	0	0	0	0	1	0	0	0	2	0	0	0	2	2	2	0	0	1	0	0	12		1269.69
pep4851	SASAGGSHQPSQSRAIPTRTVAI	0.00853767	0.0160255	0.0120292	0.0435997	0.0417694	0.0581977	3.92341	1.97211	0.00318161	2.49735	1	P70445	4EBP2_MOUSE	Eukaryotic translation initiation factor 4E-binding protein 2 (4E-BP2) (eIF4E-binding protein 2) (Phosphorylated heat- and acid-stable protein regulated by insulin 2) (PHAS-II)	Eif4ebp2	______________________________	QPSQSRAIPTRTVAISDAAQLPQDYCTTPG	M	S	A	A	I	S	4	2	0	0	0	2	0	2	1	2	0	0	0	0	2	5	2	0	0	1	0	0	23		2278.18
pep4865	SAYSSYSAPVSSSLSVRRS	0.00642332	0.0120568	0.00905018	0.0437445	0.0320172	0.0254389	3.67598	1.87813	0.0117949	1.92831	1	P08551	NFL_MOUSE	Neurofilament light polypeptide (NF-L) (68 kDa neurofilament protein) (Neurofilament triplet L protein)	Nefl Nf68 Nfl	RVHISSVRSGYSTARSAYSSYSAPVSSSLS	SYSAPVSSSLSVRRSYSSSSGSLMPSLENL	R	S	A	R	S	Y	2	2	0	0	0	0	0	0	0	0	1	0	0	0	1	9	0	0	2	2	0	0	19		1989.98
pep4900	SDVNPLSAVSSVVNK	0.0193621	0.00726866	0.00545608	0.0345428	0.0261462	0.0248463	2.66574	1.41454	0.0285708	1.54408	1	Q9QYX7	PCLO_MOUSE	Protein piccolo (Aczonin) (Brain-derived HLMN protein) (Multidomain presynaptic cytomatrix protein)	Pclo Acz	DFKEEYKSSMMPGFFSDVNPLSAVSSVVNK	SDVNPLSAVSSVVNKFNPFDLISDSEAVQE	F	S	D	N	K	F	1	0	2	1	0	0	0	0	0	0	1	1	0	0	1	4	0	0	0	4	0	0	15		1514.79
pep4960	SFASLFSD	0.00322241	0.00604857	0.00454024	0.0143558	0.0203858	0.0139419	3.52492	1.81759	0.00653036	2.18506	1	O88935	SYN1_MOUSE	Synapsin-1 (Synapsin I)	Syn1 Syn-1	SQDEVKAETIRSLRKSFASLFSD_______	TIRSLRKSFASLFSD_______________	K	S	F	S	D	-	1	0	0	1	0	0	0	0	0	0	1	0	0	2	0	3	0	0	0	0	0	0	8		872.392
pep5001	SGGPVDIGPEYQQDLDRELYKL	0.00535866	0.0100584	0.00755013	0.0238727	0.0296172	0.0365769	3.92154	1.97142	0.00464681	2.33285	1	P97450	ATP5J_MOUSE	ATP synthase-coupling factor 6, mitochondrial (ATPase subunit F6) (ATP synthase peripheral stalk subunit F6)	Atp5pf Atp5j	LFVDKIREYKSKRQASGGPVDIGPEYQQDL	GPEYQQDLDRELYKLKQMYGKGEMDTFPTF	A	S	G	K	L	K	0	1	0	3	0	2	2	3	0	1	3	1	0	0	2	1	0	0	2	1	0	0	22		2491.22
pep5010	SGNIQRISQATAQIKNLMSQL	0.00542665	0.010186	0.00764591	0.0241756	0.0293932	0.050815	4.48798	2.16607	0.0307445	1.51223	1	Q9ER00	STX12_MOUSE	Syntaxin-12	Stx12	SGPQPRDFNSIIQTCSGNIQRISQATAQIK	ISQATAQIKNLMSQLGTKQDSSKLQENLQQ	C	S	G	Q	L	G	2	1	2	0	0	4	0	1	0	3	2	1	1	0	0	3	1	0	0	0	0	0	21		2300.23
pep5056	SGTNNVAQARKLVE	0.00383903	0.00720598	0.00540902	0.0211504	0.0187819	0.0191372	3.58997	1.84397	0.000311628	3.50636	1	Q61016	GBG7_MOUSE	Guanine nucleotide-binding protein G(I)/G(S)/G(O) subunit gamma-7	Gng7 Gngt7	______________________________	MSGTNNVAQARKLVEQLRIEAGIERIKVSK	M	S	G	V	E	Q	2	1	2	0	0	1	1	1	0	0	1	1	0	0	0	1	1	0	0	2	0	0	14		1485.79
pep5082	SHHPADFTPA	0.00990647	0.0185948	0.0139578	0.0690856	0.0484661	0.0446059	3.81916	1.93325	0.00756575	2.12115	1	P01942	HBA_MOUSE	Hemoglobin subunit alpha (Alpha-globin) (Hemoglobin alpha chain)	Hba Hba-a1	VNFKLLSHCLLVTLASHHPADFTPAVHASL	LVTLASHHPADFTPAVHASLDKFLASVSTV	A	S	H	P	A	V	2	0	0	1	0	0	0	0	2	0	0	0	0	1	2	1	1	0	0	0	0	0	10		1078.48
pep5098	SHSSTFDAGAGIALNDNF	0.00459884	0.00863218	0.00647957	0.0204877	0.0251271	0.0209261	3.3759	1.75527	0.00115525	2.93733	1	P16858	G3P_MOUSE	Glyceraldehyde-3-phosphate dehydrogenase (GAPDH) (EC 1.2.1.12) (Peptidyl-cysteine S-nitrosylase GAPDH) (EC 2.6.99.-)	Gapdh Gapd	GYTEDQVVSCDFNSNSHSSTFDAGAGIALN	STFDAGAGIALNDNFVKLISWYDNEYGYSN	N	S	H	N	F	V	3	0	2	2	0	0	0	2	1	1	1	0	0	2	0	3	1	0	0	0	0	0	18		1822.81
pep5134	SIPSTANRPNRPK	0.00389314	0.00730754	0.00548526	0.0348735	0.036726	0.0154184	5.21504	2.38268	0.0271602	1.56607	1	Q08460	KCMA1_MOUSE	Calcium-activated potassium channel subunit alpha-1 (BK channel) (BKCA alpha) (Calcium-activated potassium channel, subfamily M subunit alpha-1) (K(VCA)alpha) (KCa1.1) (Maxi K channel) (MaxiK) (Slo-alpha) (Slo1) (mSlo1) (Slowpoke homolog) (Slo homolog) (mSlo)	Kcnma1 Kcnma	SHSSQSSSKKSSSVHSIPSTANRPNRPKSR	VHSIPSTANRPNRPKSRESRDKQNRKEMVY	H	S	I	P	K	S	1	2	2	0	0	0	0	0	0	1	0	1	0	0	3	2	1	0	0	0	0	0	13		1436.78
pep5208	SLGGGTGSGMGTLLISKI	0.00504005	0.00946033	0.00710121	0.0224533	0.0423313	0.0455243	5.10652	2.35234	0.0156774	1.80473	1	P68372	TBB4B_MOUSE	Tubulin beta-4B chain (Tubulin beta-2C chain)	Tubb4b Tubb2c	EAESCDCLQGFQLTHSLGGGTGSGMGTLLI	GGTGSGMGTLLISKIREEYPDRIMNTFSVV	H	S	L	K	I	R	0	0	0	0	0	0	0	6	0	2	3	1	1	0	0	3	2	0	0	0	0	0	18		1647.89
pep5211	SLGLGGRSAIEQ	0.0181774	0.00682389	0.00512222	0.0232206	0.0236207	0.0264853	2.4342	1.28345	0.0270569	1.56772	1	P20357	MTAP2_MOUSE	Microtubule-associated protein 2 (MAP-2)	Map2 Mtap2	RDLHSKNKDDLTLSRSLGLGGRSAIEQRSM	LSRSLGLGGRSAIEQRSMSINLPMSCLDSI	R	S	L	E	Q	R	1	1	0	0	0	1	1	3	0	1	2	0	0	0	0	2	0	0	0	0	0	0	12		1186.63
pep5232	SLPAVVIEIKNVPNKQPESSL	0.0099578	0.0186911	0.0140301	0.0773681	0.0487172	0.0444842	3.99657	1.99876	0.0160019	1.79583	1	Q60738	ZNT1_MOUSE	Zinc transporter 1 (ZnT-1) (Solute carrier family 30 member 1)	Slc30a1 Znt1	SENLEKKARRTKAEGSLPAVVIEIKNVPNK	IEIKNVPNKQPESSL_______________	G	S	L	S	L	-	1	0	2	0	0	1	2	0	0	2	2	2	0	0	3	3	0	0	0	3	0	0	21		2261.26
pep5238	SLPQHVMEPPVGAAAAGTSG	0.0202104	0.00758713	0.00569513	0.0351318	0.0357355	0.0235746	2.81978	1.49558	0.0281272	1.55087	1	Q6PE13	PRRT3_MOUSE	Proline-rich transmembrane protein 3	Prrt3	LRGRCRSLTEVCLRTSLPQHVMEPPVGAAA	VMEPPVGAAAAGTSGSSLDSFSKGSLKISW	T	S	L	S	G	S	4	0	0	0	0	1	1	3	1	0	1	0	1	0	3	2	1	0	0	2	0	0	20		1875.91
pep5275	SLSQAVKQTAASAGLVD	0.00445078	0.00835427	0.00627097	0.0198281	0.0228124	0.0217429	3.3751	1.75493	0.000449937	3.34685	1	Q64332	SYN2_MOUSE	Synapsin-2 (Synapsin II)	Syn2	PQPAPTPSVGSSFFSSLSQAVKQTAASAGL	SQAVKQTAASAGLVDAPAPSAASRKAKVLL	S	S	L	V	D	A	4	0	0	1	0	2	0	1	0	0	2	1	0	0	0	3	1	0	0	2	0	0	17		1644.87
pep5313	SPAAPSPGSSGGGGFFSSLSNAVK	0.0239372	0.0284357	0.024492	0.0393211	0.0635244	0.0514195	2.00696	1.00502	0.0223759	1.65022	1	O88935	SYN1_MOUSE	Synapsin-1 (Synapsin I)	Syn1 Syn-1	ATASAERASTAAPVASPAAPSPGSSGGGGF	SGGGGFFSSLSNAVKQTTAAAAATFSEQVG	A	S	P	V	K	Q	3	0	1	0	0	0	0	5	0	0	1	1	0	2	3	7	0	0	0	1	0	0	24		2165.04
pep5334	SPFYLRPPSFLRAPSWIDTGL	0.0669932	0.100124	0.0670229	0.00816515	0.00896682	0.0362935	0.228177	-2.13177	0.0138791	1.85764	-1	P23927	CRYAB_MOUSE	Alpha-crystallin B chain (Alpha(B)-crystallin) (P23)	Cryab Crya2	EHLLESDLFSTATSLSPFYLRPPSFLRAPS	PPSFLRAPSWIDTGLSEMRLEKDRFSVNLD	L	S	P	G	L	S	1	2	0	1	0	0	0	1	0	1	3	0	0	2	4	3	1	1	1	0	0	0	21		2419.27
pep5340	SPGSSGGGGFF	0.00569244	0.0106849	0.0080204	0.0271963	0.0278495	0.0226982	3.18652	1.67198	0.00120488	2.91906	1	O88935	SYN1_MOUSE	Synapsin-1 (Synapsin I)	Syn1 Syn-1	ERASTAAPVASPAAPSPGSSGGGGFFSSLS	PAAPSPGSSGGGGFFSSLSNAVKQTTAAAA	P	S	P	F	F	S	0	0	0	0	0	0	0	5	0	0	0	0	0	2	1	3	0	0	0	0	0	0	11		955.404
pep5483	SSFFSSLSQAVKQTAASAGLVD	0.00565855	0.0106213	0.00797265	0.0252087	0.0327692	0.0267212	3.49239	1.80421	0.00176822	2.75246	1	Q64332	SYN2_MOUSE	Synapsin-2 (Synapsin II)	Syn2	APQPAPQPAPTPSVGSSFFSSLSQAVKQTA	SQAVKQTAASAGLVDAPAPSAASRKAKVLL	G	S	S	V	D	A	4	0	0	1	0	2	0	1	0	0	2	1	0	2	0	6	1	0	0	2	0	0	22		2200.1
pep5581	STMDHARHGFLPRHRDTGILDSIGR	0.0713735	0.0171208	0.0642568	0.173482	0.114181	0.12556	2.70521	1.43574	0.0251874	1.59882	1	P04370	MBP_MOUSE	Myelin basic protein (MBP) (Myelin A1 protein)	Mbp Shi	SQKRPSQRSKYLATASTMDHARHGFLPRHR	LPRHRDTGILDSIGRFFSGDRGAPKRGSGK	A	S	T	G	R	F	1	4	0	3	0	0	0	3	3	2	2	0	1	1	1	2	2	0	0	0	0	0	25		2844.43
pep5595	SVAEKTKEQASHLGGAVF	0.0119042	0.0223445	0.0167725	0.0530328	0.073871	0.0682178	3.82433	1.93521	0.00225541	2.64678	1	Q91ZZ3	SYUB_MOUSE	Beta-synuclein	Sncb	LYVGSKTSGVVQGVASVAEKTKEQASHLGG	EKTKEQASHLGGAVFSGAGNIAAATGLVKK	A	S	V	V	F	S	3	0	0	0	0	1	2	2	1	0	1	2	0	1	0	2	1	0	0	2	0	0	18		1857.96
pep5601	SVAGLKKQFHKATQKV	0.0543081	0.102329	0.0504284	0.153752	0.198268	0.264327	2.97658	1.57366	0.0196253	1.70718	1	Q62420	SH3G2_MOUSE	Endophilin-A1 (Endophilin-1) (SH3 domain protein 2A) (SH3 domain-containing GRB2-like protein 2) (SH3p4)	Sh3gl2 Een1 Sh3d2a	______________________________	VAGLKKQFHKATQKVSEKVGGAEGTKLDDD	M	S	V	K	V	S	2	0	0	0	0	2	0	1	1	0	1	4	0	1	0	1	1	0	0	2	0	0	16		1769.03
pep5631	SVMPSPKVSDTVVEPYNATLSVHQL	0.0349846	0.0131334	0.00985836	0.0585912	0.0457878	0.0489664	2.64496	1.40325	0.0223074	1.65155	1	Q7TMM9	TBB2A_MOUSE	Tubulin beta-2A chain	Tubb2a Tubb2	SKIREEYPDRIMNTFSVMPSPKVSDTVVEP	TVVEPYNATLSVHQLVENTDETYSIDNEAL	F	S	V	Q	L	V	1	0	1	1	0	1	1	0	1	0	2	1	1	0	3	4	2	0	1	5	0	0	25		2697.37
pep5638	SVPAGRRSPTSSPTPQR	0.00605753	0.0113702	0.0085348	0.0634654	0.0505257	0.0239903	5.31463	2.40997	0.0333401	1.47703	1	P39053	DYN1_MOUSE	Dynamin-1 (EC 3.6.5.5)	Dnm1 Dnm Kiaa4093	TPMPPPVDDSWLQVQSVPAGRRSPTSSPTP	PAGRRSPTSSPTPQRRAPAVPPARPGSRGP	Q	S	V	Q	R	R	1	3	0	0	0	1	0	1	0	0	0	0	0	0	4	4	2	0	0	1	0	0	17		1779.93
pep5645	SVQVVSAAAAAKVPEVELKDLSPSE	0.0347968	0.0129911	0.0487577	0.0850281	0.108872	0.0590611	2.62012	1.38963	0.0425267	1.37134	1	Q68FL4	SAHH3_MOUSE	Putative adenosylhomocysteinase 3 (AdoHcyase 3) (EC 3.3.1.1) (Long-IRBIT) (S-adenosyl-L-homocysteine hydrolase 3) (S-adenosylhomocysteine hydrolase-like protein 2)	Ahcyl2	______________________________	AKVPEVELKDLSPSEAEPQLGLSAAAVGAM	M	S	V	S	E	A	5	0	0	1	0	1	3	0	0	0	2	2	0	0	2	4	0	0	0	5	0	0	25		2523.34
pep5656	SVVPSPKVSDTVVEPYN	0.0772304	0.0289928	0.0217629	0.122842	0.167834	0.122777	3.23046	1.69174	0.014379	1.84227	1	P68372	TBB4B_MOUSE	Tubulin beta-4B chain (Tubulin beta-2C chain)	Tubb4b Tubb2c	SKIREEYPDRIMNTFSVVPSPKVSDTVVEP	VPSPKVSDTVVEPYNATLSVHQLVENTDET	F	S	V	Y	N	A	0	0	1	1	0	0	1	0	0	0	0	1	0	0	3	3	1	0	1	5	0	0	17		1815.93
pep5718	TANALALAMERDGSSGGVIRL	0.00381029	0.00715203	0.00536853	0.0169747	0.0221947	0.020315	3.64246	1.86491	0.00134652	2.87079	1	Q60692	PSB6_MOUSE	Proteasome subunit beta type-6 (EC 3.4.25.1) (Low molecular mass protein 19) (Macropain delta chain) (Multicatalytic endopeptidase complex delta chain) (Proteasome delta chain) (Proteasome subunit Y)	Psmb6 Lmp19	ATYREGMTKDECLQFTANALALAMERDGSS	LAMERDGSSGGVIRLAAIQESGVERQVLLG	F	T	A	R	L	A	4	2	1	1	0	0	1	3	0	1	3	0	1	0	0	2	1	0	0	1	0	0	21		2101.09
pep5784	TELSMQDEELMKRVQQSSGPA	0.00849664	0.0159485	0.0119714	0.0451211	0.0415687	0.0440918	3.59127	1.84449	0.000194898	3.71019	1	P62073	TIM10_MOUSE	Mitochondrial import inner membrane translocase subunit Tim10	Timm10 Tim10	VSKYLDIHERMGKKLTELSMQDEELMKRVQ	DEELMKRVQQSSGPA_______________	L	T	E	P	A	-	1	1	0	1	0	3	3	1	0	0	2	1	2	0	1	3	1	0	0	1	0	0	21		2363.11
pep5810	TGEKGFGYKGSSF	0.0345709	0.0129781	0.00974177	0.0709708	0.0534251	0.0485857	3.01936	1.59424	0.0203234	1.692	1	P17742	PPIA_MOUSE	Peptidyl-prolyl cis-trans isomerase A (PPIase A) (EC 5.2.1.8) (Cyclophilin A) (Cyclosporin A-binding protein) (Rotamase A) (SP18) [Cleaved into: Peptidyl-prolyl cis-trans isomerase A, N-terminally processed]	Ppia	ADKVPKTAENFRALSTGEKGFGYKGSSFHR	LSTGEKGFGYKGSSFHRIIPGFMCQGGDFT	S	T	G	S	F	H	0	0	0	0	0	0	1	4	0	0	0	2	0	2	0	2	1	0	1	0	0	0	13		1363.64
pep5832	TGILDSIGRFFSGDRG	0.0979082	0.0848215	0.0788007	0.0256625	0.0155844	0.0465055	0.335534	-1.57547	0.00566	2.24718	-1	P04370	MBP_MOUSE	Myelin basic protein (MBP) (Myelin A1 protein)	Mbp Shi	TMDHARHGFLPRHRDTGILDSIGRFFSGDR	GILDSIGRFFSGDRGAPKRGSGKDSHTRTT	D	T	G	R	G	A	0	2	0	2	0	0	0	4	0	2	1	0	0	2	0	2	1	0	0	0	0	0	16		1696.85
pep5856	TGTPDPSRSIFKPFIFVDDV	0.0146533	0.0275047	0.0206458	0.0833637	0.0716892	0.0806949	3.75372	1.90832	0.000355616	3.44902	1	Q9CZC8	SCRN1_MOUSE	Secernin-1	Scrn1 Kiaa0193	SVLPQNRSSPCIHYFTGTPDPSRSIFKPFI	PSRSIFKPFIFVDDVKLVPKAQSPCFGDDD	F	T	G	D	V	K	0	1	0	3	0	0	0	1	0	2	0	1	0	3	3	2	2	0	0	2	0	0	20		2237.14
pep5897	TLADEVSASLAKQ	0.00455801	0.00855554	0.00642205	0.0203058	0.0289399	0.023513	3.72442	1.89701	0.00305996	2.51428	1	P10637	TAU_MOUSE	Microtubule-associated protein tau (Neurofibrillary tangle protein) (Paired helical filament-tau) (PHF-tau)	Mapt Mtapt Tau	SSTGSIDMVDSPQLATLADEVSASLAKQGL	LATLADEVSASLAKQGL_____________	A	T	L	K	Q	G	3	0	0	1	0	1	1	0	0	0	2	1	0	0	0	2	1	0	0	1	0	0	13		1331.69
pep5904	TLASHHPADFTPA	0.00754545	0.0141631	0.0106312	0.0336148	0.0469024	0.0305879	3.43556	1.78055	0.00806844	2.09321	1	P01942	HBA_MOUSE	Hemoglobin subunit alpha (Alpha-globin) (Hemoglobin alpha chain)	Hba Hba-a1	VDPVNFKLLSHCLLVTLASHHPADFTPAVH	LVTLASHHPADFTPAVHASLDKFLASVSTV	V	T	L	P	A	V	3	0	0	1	0	0	0	0	2	0	1	0	0	1	2	1	2	0	0	0	0	0	13		1363.65
pep5922	TLPTKETIEQEKR	0.00235685	0.0221194	0.0033207	0.0795315	0.0532941	0.031126	5.89818	2.56027	0.0420761	1.37596	1	Q6ZWY8	TYB10_MOUSE	Thymosin beta-10	Tmsb10 Ptmb10	FDKAKLKKTETQEKNTLPTKETIEQEKRSE	KNTLPTKETIEQEKRSEIS___________	N	T	L	K	R	S	0	1	0	0	0	1	3	0	0	1	1	2	0	0	1	0	3	0	0	0	0	0	13		1571.85
pep5942	TMDKSELVQK	0.00547679	0.0102801	0.00771657	0.0254877	0.0274529	0.0216903	3.17937	1.66874	0.00146135	2.83524	1	Q9CQV8	1433B_MOUSE	14-3-3 protein beta/alpha (Protein kinase C inhibitor protein 1) (KCIP-1) [Cleaved into: 14-3-3 protein beta/alpha, N-terminally processed]	Ywhab	______________________________	______________________________	M	T	M	Q	K	A	0	0	0	1	0	1	1	0	0	0	1	2	1	0	0	1	1	0	0	1	0	0	10		1177.6
pep5949	TMFGEKLNGTDPEDVIRNAF	0.00312757	0.00587055	0.00440661	0.0139332	0.0175742	0.0162587	3.56338	1.83324	0.00099075	3.00404	1	Q9CQ19	MYL9_MOUSE	Myosin regulatory light polypeptide 9 (Myosin regulatory light chain 2, smooth muscle isoform) (Myosin regulatory light chain 9)	Myl9 Myrl2	MMNEAPGPINFTMFLTMFGEKLNGTDPEDV	KLNGTDPEDVIRNAFACFDEEASGFIHEDH	L	T	M	A	F	A	1	1	2	2	0	0	2	2	0	1	1	1	1	2	1	0	2	0	0	1	0	0	20		2253.07
pep5956	TMVADTPENLRLKQQSELQSQVRY	0.00552932	0.0518935	0.0599338	0.108675	0.157657	0.119323	3.28618	1.71641	0.0166041	1.77979	1	Q61792	LASP1_MOUSE	LIM and SH3 domain protein 1 (LASP-1) (Metastatic lymph node gene 50 protein) (MLN 50)	Lasp1 Mln50	EKKPYCNAHYPKQSFTMVADTPENLRLKQQ	LRLKQQSELQSQVRYKEEFEKNKGKGFSVV	F	T	M	R	Y	K	1	2	1	1	0	4	2	0	0	0	3	1	1	0	1	2	2	0	1	2	0	0	24		2833.44
pep5966	TNPEHASDAMRAMNGESL	0.00486711	0.00913573	0.00685756	0.0216829	0.0487754	0.0675977	6.61809	2.72641	0.043285	1.36366	1	O89086	RBM3_MOUSE	RNA-binding protein 3 (RNA-binding motif protein 3)	Rbm3	DRETQRSRGFGFITFTNPEHASDAMRAMNG	EHASDAMRAMNGESLDGRQIRVDHAGKSAR	F	T	N	S	L	D	3	1	2	1	0	0	2	1	1	0	1	0	2	0	1	2	1	0	0	0	0	0	18		1929.83
pep6014	TQAGSEVSALLGRIPSAVGY	0.0198373	0.022764	0.0147674	0.00186771	0.00205109	0.00166037	0.0972512	-3.36214	0.0017954	2.74584	-1	P56480	ATPB_MOUSE	ATP synthase subunit beta, mitochondrial (EC 7.1.2.2) (ATP synthase F1 subunit beta)	Atp5f1b Atp5b	EGQDVLLFIDNIFRFTQAGSEVSALLGRIP	EVSALLGRIPSAVGYQPTLATDMGTMQERI	F	T	Q	G	Y	Q	3	1	0	0	0	1	1	3	0	1	2	0	0	0	1	3	1	0	1	2	0	0	20		1975.04
pep6031	TQRIVAPPGGRANITS	0.020419	0.0383272	0.0287696	0.0909663	0.110399	0.0898908	3.32804	1.73467	0.00129296	2.88842	1	O08553	DPYL2_MOUSE	Dihydropyrimidinase-related protein 2 (DRP-2) (Unc-33-like phosphoprotein 2) (ULIP-2)	Dpysl2 Crmp2 Ulip2	SLSGAQIDDNIPRRTTQRIVAPPGGRANIT	QRIVAPPGGRANITSLG_____________	T	T	Q	T	S	L	2	2	1	0	0	1	0	2	0	2	0	0	0	0	2	1	2	0	0	1	0	0	16		1636.9
pep6037	TQVVHESFQGRSR	0.617011	0.470617	0.380857	0.0187531	0.102971	0.224631	0.235859	-2.084	0.0148071	1.82953	-1	P20917	MAG_MOUSE	Myelin-associated glycoprotein (Siglec-4a)	Mag	SPYPKNYPPVVFKSRTQVVHESFQGRSRLL	SRTQVVHESFQGRSRLLGDLGLRNCTLLLS	R	T	Q	S	R	L	0	2	0	0	0	2	1	1	1	0	0	0	0	1	0	2	1	0	0	2	0	0	13		1529.77
pep6078	TSVAKVYYSQTTQTE	0.0127436	0.00478402	0.00359103	0.0426147	0.0299275	0.0248364	4.61104	2.20509	0.0134206	1.87223	1	Q9JM63	KCJ10_MOUSE	ATP-sensitive inward rectifier potassium channel 10 (Inward rectifier K(+) channel Kir4.1) (Potassium channel, inwardly rectifying subfamily J member 10)	Kcnj10	______________________________	TSVAKVYYSQTTQTESRPLVAPGIRRRRVL	M	T	S	T	E	S	1	0	0	0	0	2	1	0	0	0	0	1	0	0	0	2	4	0	2	2	0	0	15		1704.82
pep6109	TTRKTPQGPPEIYSDTQFPSLQ	0.00575487	0.0108021	0.00810837	0.0351759	0.0309316	0.0227916	3.60422	1.84969	0.00543861	2.26451	1	Q4VAA2	CDV3_MOUSE	Protein CDV3 (Carnitine deficiency-associated protein 3) (Tyrosine-phosphorylated protein 36) (TPP36)	Cdv3	AMPSGVYRPPGARLTTTRKTPQGPPEIYSD	GPPEIYSDTQFPSLQSTAKHVESRKDKEME	T	T	T	L	Q	S	0	1	0	1	0	3	1	1	0	1	1	1	0	1	4	2	4	0	1	0	0	0	22		2490.24
pep6126	TVGDVNTDRPGLLD	0.00519613	0.00975331	0.00732113	0.0275124	0.0254214	0.0340803	3.90713	1.96611	0.00179172	2.74673	1	P31786	ACBP_MOUSE	Acyl-CoA-binding protein (ACBP) (Diazepam-binding inhibitor) (DBI) (Endozepine) (EP)	Dbi	TDEEMLFIYSHFKQATVGDVNTDRPGLLDL	ATVGDVNTDRPGLLDLKGKAKWDSWNKLKG	A	T	V	L	D	L	0	1	1	3	0	0	0	2	0	0	2	0	0	0	1	0	2	0	0	2	0	0	14		1470.73
pep6175	VATLGVEVHPL	0.00288418	0.00541369	0.00406368	0.0252259	0.0141104	0.0293061	5.5529	2.47324	0.0151086	1.82078	1	P62827	RAN_MOUSE	GTP-binding nuclear protein Ran (GTPase Ran) (Ras-like protein TC4) (Ras-related nuclear protein)	Ran Rasl2-8	TFVKRHLTGEFEKKYVATLGVEVHPLVFHT	EKKYVATLGVEVHPLVFHTNRGPIKFNVWD	Y	V	A	P	L	V	1	0	0	0	0	0	1	1	1	0	2	0	0	0	1	0	1	0	0	3	0	0	11		1133.64
pep6184	VAYWRQAGLSYIRFS	0.00614018	0.0115253	0.0432563	0.0584367	0.101047	0.100967	4.27515	2.09598	0.0221319	1.65498	1	P56382	ATP5E_MOUSE	ATP synthase subunit epsilon, mitochondrial (ATPase subunit epsilon) (ATP synthase F1 subunit epsilon)	Atp5f1e Atp5e	______________________________	VAYWRQAGLSYIRFSQICAKAVRDALKTEF	M	V	A	F	S	Q	2	2	0	0	0	1	0	1	0	1	1	0	0	1	0	2	0	1	2	1	0	0	15		1815.94
pep6210	VDREQLVQKARLA	0.098582	0.0331652	0.124474	0.170763	0.244148	0.170711	2.28561	1.19258	0.0398276	1.39982	1	P61982	1433G_MOUSE	14-3-3 protein gamma [Cleaved into: 14-3-3 protein gamma, N-terminally processed]	Ywhag	______________________________	______________________________	M	V	D	L	A	E	2	2	0	1	0	2	1	0	0	0	2	1	0	0	0	0	0	0	0	2	0	0	13		1524.87
pep6239	VEVMPQNQKAIGNALK	0.00506076	0.00949921	0.00713039	0.0287716	0.0247591	0.0227296	3.51586	1.81388	0.00114722	2.94035	1	Q9DCX2	ATP5H_MOUSE	ATP synthase subunit d, mitochondrial (ATPase subunit d) (ATP synthase peripheral stalk subunit d)	Atp5pd Atp5h	AGRKLALKTIDWVSFVEVMPQNQKAIGNAL	EVMPQNQKAIGNALKSWNETFHARLASLSE	F	V	E	L	K	S	2	0	2	0	0	2	1	1	0	1	1	2	1	0	1	0	0	0	0	2	0	0	16		1738.94
pep6240	VEVMPQNQKAIGNALKSWNET	0.0163925	0.0307693	0.0230964	0.155535	0.0801982	0.187761	6.02769	2.59161	0.021515	1.66726	1	Q9DCX2	ATP5H_MOUSE	ATP synthase subunit d, mitochondrial (ATPase subunit d) (ATP synthase peripheral stalk subunit d)	Atp5pd Atp5h	AGRKLALKTIDWVSFVEVMPQNQKAIGNAL	NQKAIGNALKSWNETFHARLASLSEKPPAI	F	V	E	E	T	F	2	0	3	0	0	2	2	1	0	1	1	2	1	0	1	1	1	1	0	2	0	0	21		2356.18
pep6268	VGDVNTDRPGLLDL	0.00497712	0.00934221	0.00701255	0.0284373	0.0243499	0.0286239	3.81641	1.93222	0.000440019	3.35653	1	P31786	ACBP_MOUSE	Acyl-CoA-binding protein (ACBP) (Diazepam-binding inhibitor) (DBI) (Endozepine) (EP)	Dbi	DEEMLFIYSHFKQATVGDVNTDRPGLLDLK	TVGDVNTDRPGLLDLKGKAKWDSWNKLKGT	T	V	G	D	L	K	0	1	1	3	0	0	0	2	0	0	3	0	0	0	1	0	1	0	0	2	0	0	14		1482.77
pep6281	VGNLPFNTVQGDIDAI	0.00429807	0.00806761	0.00605579	0.0191478	0.0357035	0.0328844	4.76268	2.25177	0.0115203	1.93854	1	Q9WUK2	IF4H_MOUSE	Eukaryotic translation initiation factor 4H (eIF-4H) (Williams-Beuren syndrome chromosomal region 1 protein homolog)	Eif4h Wbscr1	RSQKELPTEPPYTAYVGNLPFNTVQGDIDA	GNLPFNTVQGDIDAIFKDLSIRSVRLVRDK	Y	V	G	A	I	F	1	0	2	2	0	1	0	2	0	2	1	0	0	1	1	0	1	0	0	2	0	0	16		1671.85
pep6296	VGSKTKEGVVHGVTTV	0.0120409	0.00452024	0.0606438	0.267124	0.287794	0.611806	15.112	3.91763	0.0324552	1.48872	1	O55042	SYUA_MOUSE	Alpha-synuclein (Non-A beta component of AD amyloid) (Non-A4 component of amyloid precursor) (NACP)	Snca Syn	GVAEAAGKTKEGVLYVGSKTKEGVVHGVTT	GSKTKEGVVHGVTTVAEKTKEQVTNVGGAV	Y	V	G	T	V	A	0	0	0	0	0	0	1	3	1	0	0	2	0	0	0	1	3	0	0	5	0	0	16		1596.88
pep6401	VMPQNQKAIGNALKSWNETFHARLA	0.00545915	0.010247	0.00769171	0.0382483	0.0267082	0.0612905	5.39566	2.4318	0.0287898	1.54076	1	Q9DCX2	ATP5H_MOUSE	ATP synthase subunit d, mitochondrial (ATPase subunit d) (ATP synthase peripheral stalk subunit d)	Atp5pd Atp5h	RKLALKTIDWVSFVEVMPQNQKAIGNALKS	NALKSWNETFHARLASLSEKPPAIDWAYYR	E	V	M	L	A	S	4	1	3	0	0	2	1	1	1	1	2	2	1	1	1	1	1	1	0	1	0	0	25		2823.46
pep6415	VNHPQVSALLGEEDEEALHYLTR	0.00770431	0.0144612	0.0108551	0.0343225	0.0399653	0.041521	3.50717	1.81031	0.000709631	3.14897	1	Q9EQU5	SET_MOUSE	Protein SET (Phosphatase 2A inhibitor I2PP2A) (I-2PP2A) (Template-activating factor I) (TAF-I)	Set	SELIAKIPNFWVTTFVNHPQVSALLGEEDE	LLGEEDEEALHYLTRVEVTEFEDIKSGYRI	F	V	N	T	R	V	2	1	1	1	0	1	4	1	2	0	4	0	0	0	1	1	1	0	1	2	0	0	23		2619.29
pep6421	VNPTVFFD	0.0035658	0.00669312	0.00502406	0.0158855	0.0181633	0.0169813	3.33901	1.73942	0.000438131	3.3584	1	P17742	PPIA_MOUSE	Peptidyl-prolyl cis-trans isomerase A (PPIase A) (EC 5.2.1.8) (Cyclophilin A) (Cyclosporin A-binding protein) (Rotamase A) (SP18) [Cleaved into: Peptidyl-prolyl cis-trans isomerase A, N-terminally processed]	Ppia	______________________________	______________________________	M	V	N	F	D	I	0	0	1	1	0	0	0	0	0	0	0	0	0	2	1	0	1	0	0	2	0	0	8		937.455
pep6451	VPERAPLPPPVPSQ	0.00327167	0.00614102	0.00460964	0.0145752	0.0299537	0.0163309	4.34021	2.11776	0.0339658	1.46896	1	Q0VGU4	VGF_MOUSE	Neurosecretory protein VGF [Cleaved into: Neuroendocrine regulatory peptide-1 (NERP-1); Neuroendocrine regulatory peptide-2 (NERP-2); VGF-derived peptide TLQP-21; VGF-derived peptide TLQP-62]	Vgf	PERVWRASWGEFQARVPERAPLPPPVPSQF	RVPERAPLPPPVPSQFQARMSESAPLPETH	R	V	P	S	Q	F	1	1	0	0	0	1	1	0	0	0	1	0	0	0	6	1	0	0	0	2	0	0	14		1482.82
pep6458	VPPVQVSPL	0.00751989	0.0640703	0.0331002	0.0999022	0.0778176	0.111709	2.76462	1.46708	0.032311	1.49065	1	Q06185	ATP5I_MOUSE	ATP synthase subunit e, mitochondrial (ATPase subunit e) (ATP synthase membrane subunit e)	Atp5me Atp5i Atp5k Lfm-1 Lfm1	______________________________	______________________________	M	V	P	P	L	I	0	0	0	0	0	1	0	0	0	0	1	0	0	0	3	1	0	0	0	3	0	0	9		934.549
pep6459	VPPVQVSPLIK	0.00629112	0.0118086	0.00886391	0.0365326	0.0307784	0.028828	3.56551	1.83411	0.00119987	2.92086	1	Q06185	ATP5I_MOUSE	ATP synthase subunit e, mitochondrial (ATPase subunit e) (ATP synthase membrane subunit e)	Atp5me Atp5i Atp5k Lfm-1 Lfm1	______________________________	______________________________	M	V	P	I	K	F	0	0	0	0	0	1	0	0	0	1	1	1	0	0	3	1	0	0	0	3	0	0	11		1175.73
pep6460	VPPVQVSPLIKF	0.355237	0.0847313	0.31801	0.538142	0.679413	0.765424	2.61614	1.38744	0.0191258	1.71838	1	Q06185	ATP5I_MOUSE	ATP synthase subunit e, mitochondrial (ATPase subunit e) (ATP synthase membrane subunit e)	Atp5me Atp5i Atp5k Lfm-1 Lfm1	______________________________	______________________________	M	V	P	K	F	G	0	0	0	0	0	1	0	0	0	1	1	1	0	1	3	1	0	0	0	3	0	0	12		1322.8
pep6464	VPPVQVSPLIKFGRYSAL	0.00456059	0.00856038	0.00642568	0.0203173	0.0245433	0.0332305	3.99512	1.99824	0.00797511	2.09826	1	Q06185	ATP5I_MOUSE	ATP synthase subunit e, mitochondrial (ATPase subunit e) (ATP synthase membrane subunit e)	Atp5me Atp5i Atp5k Lfm-1 Lfm1	______________________________	VQVSPLIKFGRYSALIIGMAYGAKRYSYLK	M	V	P	A	L	I	1	1	0	0	0	1	0	1	0	1	2	1	0	1	3	2	0	0	1	3	0	0	18		1970.14
pep6466	VPRGEAAGAVQELA	0.401989	0.569049	0.608959	0.0540235	0.0593276	0.048026	0.102138	-3.29141	0.00173465	2.76079	-1	Q9QXV0	PCS1N_MOUSE	ProSAAS (IA-4) (Proprotein convertase subtilisin/kexin type 1 inhibitor) (Proprotein convertase 1 inhibitor) (pro-SAAS) [Cleaved into: KEP; Big SAAS (b-SAAS); Little SAAS (l-SAAS); Big PEN-LEN (b-PEN-LEN) (SAAS CT(1-49)); PEN; PEN-20; PEN-19; Little LEN (l-LEN); Big LEN (b-LEN) (SAAS CT(25-40))]	Pcsk1n	APLVETSTPLRLRRAVPRGEAAGAVQELAR	AVPRGEAAGAVQELARALAHLLEAERQERA	A	V	P	L	A	R	4	1	0	0	0	1	2	2	0	0	1	0	0	0	1	0	0	0	0	2	0	0	14		1366.72
pep6469	VPRPEDTLTYADLDMVHLS	0.00192011	0.0036041	0.00270535	0.0152242	0.0108736	0.0076044	4.09526	2.03395	0.0198258	1.70277	1	P97797	SHPS1_MOUSE	Tyrosine-protein phosphatase non-receptor type substrate 1 (SHP substrate 1) (SHPS-1) (Brain Ig-like molecule with tyrosine-based activation motifs) (Bit) (CD172 antigen-like family member A) (Inhibitory receptor SHPS-1) (MyD-1 antigen) (Signal-regulatory protein alpha-1) (Sirp-alpha-1) (mSIRP-alpha1) (p84) (CD antigen CD172a)	Sirpa Bit Myd1 Ptpns1 Shps1 Sirp	EPNNHTEYASIETGKVPRPEDTLTYADLDM	EDTLTYADLDMVHLSRAQPAPKPEPSFSEY	K	V	P	L	S	R	1	1	0	3	0	0	1	0	1	0	3	0	1	0	2	1	2	0	1	2	0	0	19		2171.06
pep6488	VRKPVVATISKGGYLQ	0.318495	0.0253413	0.208853	0.546266	0.566735	0.380114	2.70154	1.43378	0.0393285	1.40529	1	Q9WTR6	XCT_MOUSE	Cystine/glutamate transporter (Amino acid transport system xc-) (Solute carrier family 7 member 11) (xCT)	Slc7a11	______________________________	RKPVVATISKGGYLQGNMSGRLPSMGDQEP	M	V	R	L	Q	G	1	1	0	0	0	1	0	2	0	1	1	2	0	0	1	1	1	0	1	3	0	0	16		1715.01
pep6514	VTEAAEKTKEGVLY	0.00508236	0.00953976	0.00716083	0.026746	0.0248648	0.0252329	3.52769	1.81873	0.000201308	3.69614	1	Q91ZZ3	SYUB_MOUSE	Beta-synuclein	Sncb	AKEGVVAAAEKTKQGVTEAAEKTKEGVLYV	GVTEAAEKTKEGVLYVGSKTSGVVQGVASV	G	V	T	L	Y	V	2	0	0	0	0	0	3	1	0	0	1	2	0	0	0	0	2	0	1	2	0	0	14		1536.8
pep6529	VVAAAEKTKQGVTEA	0.0170773	0.00641093	0.00481224	0.0232599	0.0210263	0.0236017	2.39882	1.26233	0.0284431	1.54602	1	Q91ZZ3	SYUB_MOUSE	Beta-synuclein	Sncb	______________________________	VVAAAEKTKQGVTEAAEKTKEGVLYVGSKT	G	V	V	E	A	A	4	0	0	0	0	1	2	1	0	0	0	2	0	0	0	0	2	0	0	3	0	0	15		1500.81
pep6570	WDDYVPKLYEQLSGK	0.241438	0.217604	0.0326681	0.484456	0.341277	0.48884	2.67347	1.41871	0.0285613	1.54422	1	P70296	PEBP1_MOUSE	Phosphatidylethanolamine-binding protein 1 (PEBP-1) (HCNPpp) [Cleaved into: Hippocampal cholinergic neurostimulating peptide (HCNP)]	Pebp1 Pbp Pebp	YNLGAPVAGTCYQAEWDDYVPKLYEQLSGK	WDDYVPKLYEQLSGK_______________	E	W	D	G	K	-	0	0	0	2	0	1	1	1	0	0	2	2	0	0	1	1	0	1	2	1	0	0	15		1839.9
pep6608	YAYGATGHPGIIPPHATLVFDVELL	0.0079707	0.0149613	0.0112304	0.0553462	0.0389956	0.046796	4.13138	2.04663	0.00225955	2.64598	1	P26883	FKB1A_MOUSE	Peptidyl-prolyl cis-trans isomerase FKBP1A (PPIase FKBP1A) (EC 5.2.1.8) (12 kDa FK506-binding protein) (12 kDa FKBP) (FKBP-12) (Calstabin-1) (FK506-binding protein 1A) (FKBP-1A) (Immunophilin FKBP12) (Rotamase)	Fkbp1a Fkbp1	QMSVGQRAKLIISSDYAYGATGHPGIIPPH	IIPPHATLVFDVELLKLE____________	D	Y	A	L	L	K	3	0	0	1	0	0	1	3	2	2	3	0	0	1	3	0	2	0	2	2	0	0	25		2650.38
pep6632	YEVPLETPR	0.00404704	0.00759643	0.00570211	0.0327035	0.0197996	0.0240499	4.4134	2.14189	0.00739361	2.13114	1	P70699	LYAG_MOUSE	Lysosomal alpha-glucosidase (EC 3.2.1.20) (Acid maltase)	Gaa	DSRLHFKIKDPASKRYEVPLETPRVLSQAP	DPASKRYEVPLETPRVLSQAPSPLYSVEFS	R	Y	E	P	R	V	0	1	0	0	0	0	2	0	0	0	1	0	0	0	2	0	1	0	1	1	0	0	9		1102.57
pep6634	YFDSFGDLSSASAIMGNAKVK	0.0527026	0.0197849	0.0148511	0.0638671	0.074477	0.0771076	2.46685	1.30267	0.0272148	1.5652	1	P02088	HBB1_MOUSE	Hemoglobin subunit beta-1 (Beta-1-globin) (Hemoglobin beta-1 chain) (Hemoglobin beta-major chain)	Hbb-b1	EALGRLLVVYPWTQRYFDSFGDLSSASAIM	DLSSASAIMGNAKVKAHGKKVITAFNDGLN	R	Y	F	V	K	A	3	0	1	2	0	0	0	2	0	1	1	2	1	2	0	4	0	0	1	1	0	0	21		2207.06
pep6640	YFNKPDIDAWELRKGMNTL	0.0424391	0.0159319	0.011959	0.120675	0.139752	0.155652	5.91608	2.56464	0.00116146	2.935	1	P12787	COX5A_MOUSE	Cytochrome c oxidase subunit 5A, mitochondrial (Cytochrome c oxidase polypeptide Va)	Cox5a	GSHETDEEFDARWVTYFNKPDIDAWELRKG	PDIDAWELRKGMNTLVGYDLVPEPKIIDAA	T	Y	F	T	L	V	1	1	2	2	0	0	1	1	0	1	2	2	1	1	1	0	1	1	1	0	0	0	19		2310.15
pep6679	YIQQVRKAPSG	0.112114	0.13304	0.14664	0.0126304	0.0857448	0.0760871	0.44529	-1.16718	0.0443918	1.3527	-1	P09240	CCKN_MOUSE	Cholecystokinin (CCK) [Cleaved into: Cholecystokinin-33 (CCK33); Cholecystokinin-12 (CCK12); Cholecystokinin-8 (CCK8)]	Cck	TDGEPRARLGALLARYIQQVRKAPSGRMSV	LLARYIQQVRKAPSGRMSVLKNLQSLDPSH	R	Y	I	S	G	R	1	1	0	0	0	2	0	1	0	1	0	1	0	0	1	1	0	0	1	1	0	0	11		1245.68
pep6702	YLATSQPRPDSSGSGH	0.00534756	0.0100375	0.00753449	0.0238232	0.0377137	0.0337635	4.15803	2.0559	0.00516321	2.28708	1	Q6P5F7	TTYH3_MOUSE	Protein tweety homolog 3 (mTTY3)	Ttyh3 Kiaa1691	RESPPPSYTSSMRAKYLATSQPRPDSSGSG	LATSQPRPDSSGSGH_______________	K	Y	L	G	H	-	1	1	0	1	0	1	0	2	1	0	1	0	0	0	2	4	1	0	1	0	0	0	16		1658.76
pep6737	YPQSKWQEQ	0.0410893	0.0626649	0.0755962	0.00510743	0.0280444	0.0322583	0.364706	-1.45519	0.0444737	1.3519	-1	P16014	SCG1_MOUSE	Secretogranin-1 (Chromogranin-B) (CgB) (Secretogranin I) (SgI) [Cleaved into: CCB peptide; PE-11]	Chgb Scg-1 Scg1	GHYPVRESPIDTAKRYPQSKWQEQEKNYLN	IDTAKRYPQSKWQEQEKNYLNYGEEGDQGR	R	Y	P	E	Q	E	0	0	0	0	0	3	1	0	0	0	0	1	0	0	1	1	0	1	1	0	0	0	9		1192.55
pep6775	YTQKAPQVSTPTLVEA	0.00635652	0.0119314	0.0447803	0.0505471	0.061425	0.0746899	2.95968	1.56544	0.0411482	1.38565	1	P07724	ALBU_MOUSE	Albumin	Alb Alb-1 Alb1	EKLGEYGFQNAILVRYTQKAPQVSTPTLVE	TQKAPQVSTPTLVEAARNLGRVGTKCCTLP	R	Y	T	E	A	A	2	0	0	0	0	2	1	0	0	0	1	1	0	0	2	1	3	0	1	2	0	0	16		1731.9
pep6778	YVEKVDELKKKYGI	0.0342255	0.0622315	0.0504731	0.151633	0.105046	0.111941	2.50881	1.327	0.0113097	1.94655	1	P31786	ACBP_MOUSE	Acyl-CoA-binding protein (ACBP) (Diazepam-binding inhibitor) (DBI) (Endozepine) (EP)	Dbi	WNKLKGTSKESAMKTYVEKVDELKKKYGI_	TYVEKVDELKKKYGI_______________	T	Y	V	G	I	-	0	0	0	1	0	0	2	1	0	1	1	4	0	0	0	0	0	0	2	2	0	0	14		1710.96
[truncated: 38 more columns]

## Sheet: BP
ID	Gene Name	Species	GOTERM_BP_DIRECT
P56480	ATP synthase, H+ transporting mitochondrial F1 complex, beta subunit(Atp5b)	Mus musculus	GO:0001525~angiogenesis,GO:0001649~osteoblast differentiation,GO:0006629~lipid metabolic process,GO:0006754~ATP biosynthetic process,GO:0006810~transport,GO:0006811~ion transport,GO:0006898~receptor-mediated endocytosis,GO:0006933~negative regulation of cell adhesion involved in substrate-bound cell migration,GO:0015986~ATP synthesis coupled proton transport,GO:0015991~ATP hydrolysis coupled prot…
Q9DCX2	ATP synthase, H+ transporting, mitochondrial F0 complex, subunit D(Atp5h)	Mus musculus	GO:0006810~transport,GO:0006811~ion transport,GO:0015986~ATP synthesis coupled proton transport,GO:0015992~proton transport,GO:0046034~ATP metabolic process,
P97450	ATP synthase, H+ transporting, mitochondrial F0 complex, subunit F(Atp5j)	Mus musculus	GO:0006810~transport,GO:0006811~ion transport,GO:0015986~ATP synthesis coupled proton transport,GO:0015992~proton transport,GO:0021762~substantia nigra development,GO:0046034~ATP metabolic process,
Q9D3D9	ATP synthase, H+ transporting, mitochondrial F1 complex, delta subunit(Atp5d)	Mus musculus	GO:0006754~ATP biosynthetic process,GO:0006810~transport,GO:0006811~ion transport,GO:0015986~ATP synthesis coupled proton transport,GO:0015992~proton transport,GO:0046034~ATP metabolic process,
P56382	ATP synthase, H+ transporting, mitochondrial F1 complex, epsilon subunit(Atp5e)	Mus musculus	GO:0006754~ATP biosynthetic process,GO:0006810~transport,GO:0006811~ion transport,GO:0015986~ATP synthesis coupled proton transport,GO:0015992~proton transport,
Q06185	ATP synthase, H+ transporting, mitochondrial F1F0 complex, subunit E(Atp5k)	Mus musculus	GO:0006754~ATP biosynthetic process,GO:0006810~transport,GO:0006811~ion transport,GO:0015986~ATP synthesis coupled proton transport,GO:0015992~proton transport,GO:0046034~ATP metabolic process,
Q9CR51	ATPase, H+ transporting, lysosomal V1 subunit G1(Atp6v1g1)	Mus musculus	GO:0006810~transport,GO:0006811~ion transport,GO:0015992~proton transport,
Q9WTT4	ATPase, H+ transporting, lysosomal V1 subunit G2(Atp6v1g2)	Mus musculus	GO:0006810~transport,GO:0006811~ion transport,GO:0015992~proton transport,
P26883	FK506 binding protein 1a(Fkbp1a)	Mus musculus	GO:0000413~protein peptidyl-prolyl isomerization,GO:0001933~negative regulation of protein phosphorylation,GO:0003007~heart morphogenesis,GO:0006457~protein folding,GO:0006936~muscle contraction,GO:0007183~SMAD protein complex assembly,GO:0010039~response to iron ion,GO:0019221~cytokine-mediated signaling pathway,GO:0031000~response to caffeine,GO:0031398~positive regulation of protein ubiquitina…
Q61792	LIM and SH3 protein 1(Lasp1)	Mus musculus	GO:0006810~transport,GO:0006811~ion transport,GO:0098609~cell-cell adhesion,
A2AG50	MAP7 domain containing 2(Map7d2)	Mus musculus	GO:0000226~microtubule cytoskeleton organization,
Q9CWZ7	N-ethylmaleimide sensitive fusion protein attachment protein gamma(Napg)	Mus musculus	GO:0006810~transport,GO:0006886~intracellular protein transport,GO:0015031~protein transport,GO:0016192~vesicle-mediated transport,GO:0061025~membrane fusion,
Q9Z1P6	NADH dehydrogenase (ubiquinone) 1 alpha subcomplex, 7 (B14.5a)(Ndufa7)	Mus musculus	GO:0006120~mitochondrial electron transport, NADH to ubiquinone,GO:0006810~transport,GO:0032543~mitochondrial translation,GO:0042773~ATP synthesis coupled electron transport,GO:0055114~oxidation-reduction process,
P52503	NADH dehydrogenase (ubiquinone) Fe-S protein 6(Ndufs6)	Mus musculus	GO:0006120~mitochondrial electron transport, NADH to ubiquinone,GO:0006631~fatty acid metabolic process,GO:0006810~transport,GO:0006936~muscle contraction,GO:0010259~multicellular organism aging,GO:0022904~respiratory electron transport chain,GO:0035264~multicellular organism growth,GO:0055114~oxidation-reduction process,GO:0061458~reproductive system development,GO:0070584~mitochondrion morphoge…
P62827	RAN, member RAS oncogene family(Ran)	Mus musculus	GO:0000054~ribosomal subunit export from nucleus,GO:0000055~ribosomal large subunit export from nucleus,GO:0000056~ribosomal small subunit export from nucleus,GO:0000060~protein import into nucleus, translocation,GO:0006606~protein import into nucleus,GO:0006611~protein export from nucleus,GO:0006810~transport,GO:0006886~intracellular protein transport,GO:0006913~nucleocytoplasmic transport,GO:00…
Q8R404	RIKEN cDNA 2410015M20 gene(2410015M20Rik)	Mus musculus	GO:0042407~cristae formation,
O89086	RNA binding motif protein 3(Rbm3)	Mus musculus	GO:0006412~translation,GO:0006417~regulation of translation,GO:0009409~response to cold,GO:0035196~production of miRNAs involved in gene silencing by miRNA,GO:0045727~positive regulation of translation,
Q68FL4	S-adenosylhomocysteine hydrolase-like 2(Ahcyl2)	Mus musculus	GO:0006730~one-carbon metabolic process,GO:0019510~S-adenosylhomocysteine catabolic process,GO:0033353~S-adenosylmethionine cycle,
Q8CFE4	SCY1-like 2 (S. cerevisiae)(Scyl2)	Mus musculus	GO:0002092~positive regulation of receptor internalization,GO:0006468~protein phosphorylation,GO:0008333~endosome to lysosome transport,GO:0090090~negative regulation of canonical Wnt signaling pathway,GO:2000286~receptor internalization involved in canonical Wnt signaling pathway,GO:2000370~positive regulation of clathrin-mediated endocytosis,
Q9EQU5	SET nuclear oncogene(Set)	Mus musculus	GO:0006334~nucleosome assembly,GO:0043524~negative regulation of neuron apoptotic process,GO:0045892~negative regulation of transcription, DNA-templated,
Q91VW3	SH3 domain binding glutamic acid-rich protein-like 3(Sh3bgrl3)	Mus musculus	GO:0030834~regulation of actin filament depolymerization,GO:0032956~regulation of actin cytoskeleton organization,GO:0043535~regulation of blood vessel endothelial cell migration,GO:0043547~positive regulation of GTPase activity,GO:0045454~cell redox homeostasis,
Q62420	SH3-domain GRB2-like 2(Sh3gl2)	Mus musculus	GO:0002090~regulation of receptor internalization,GO:0006897~endocytosis,GO:0048488~synaptic vesicle endocytosis,
Q0VGU4	VGF nerve growth factor inducible(Vgf)	Mus musculus	GO:0001541~ovarian follicle development,GO:0002021~response to dietary excess,GO:0006091~generation of precursor metabolites and energy,GO:0009409~response to cold,GO:0019953~sexual reproduction,GO:0030073~insulin secretion,GO:0032868~response to insulin,GO:0042593~glucose homeostasis,GO:0043084~penile erection,GO:0048167~regulation of synaptic plasticity,GO:0048168~regulation of neuronal synapti…
Q9JM76	actin related protein 2/3 complex, subunit 3(Arpc3)	Mus musculus	GO:0030833~regulation of actin filament polymerization,GO:0034314~Arp2/3 complex-mediated actin nucleation,GO:1990090~cellular response to nerve growth factor stimulus,
Q8VHQ9	acyl-CoA thioesterase 11(Acot11)	Mus musculus	GO:0006631~fatty acid metabolic process,GO:0006637~acyl-CoA metabolic process,GO:0009266~response to temperature stimulus,GO:0009409~response to cold,GO:0035556~intracellular signal transduction,
P07724	albumin(Alb)	Mus musculus	GO:0001895~retina homeostasis,GO:0006810~transport,GO:0009267~cellular response to starvation,GO:0019836~hemolysis by symbiont of host erythrocytes,GO:0043066~negative regulation of apoptotic process,GO:0046010~positive regulation of circadian sleep/wake cycle, non-REM sleep,GO:0051659~maintenance of mitochondrion location,
P05064	aldolase A, fructose-bisphosphate(Aldoa)	Mus musculus	GO:0001666~response to hypoxia,GO:0006000~fructose metabolic process,GO:0006096~glycolytic process,GO:0006754~ATP biosynthetic process,GO:0006941~striated muscle contraction,GO:0008360~regulation of cell shape,GO:0009408~response to heat,GO:0030388~fructose 1,6-bisphosphate metabolic process,GO:0032496~response to lipopolysaccharide,GO:0035094~response to nicotine,GO:0043627~response to estrogen,…
Q9CQC6	basic leucine zipper and W2 domains 1(Bzw1)	Mus musculus	GO:0006351~transcription, DNA-templated,GO:0006355~regulation of transcription, DNA-templated,GO:0098609~cell-cell adhesion,
Q61361	brevican(Bcan)	Mus musculus	GO:0001501~skeletal system development,GO:0007155~cell adhesion,GO:0021766~hippocampus development,
O88456	calpain, small subunit 1(Capns1)	Mus musculus	GO:0006508~proteolysis,
P06797	cathepsin L(Ctsl)	Mus musculus	GO:0006508~proteolysis,GO:0007154~cell communication,GO:0007283~spermatogenesis,GO:0008584~male gonad development,GO:0009267~cellular response to starvation,GO:0009749~response to glucose,GO:0010259~multicellular organism aging,GO:0010839~negative regulation of keratinocyte proliferation,GO:0014070~response to organic cyclic compound,GO:0016485~protein processing,GO:0016540~protein autoprocessing…
Q9R171	cerebellin 1 precursor protein(Cbln1)	Mus musculus	GO:0007157~heterophilic cell-cell adhesion via plasma membrane cell adhesion molecules,GO:0009306~protein secretion,GO:0021707~cerebellar granule cell differentiation,GO:0051965~positive regulation of synapse assembly,
Q8BME9	cerebellin 4 precursor protein(Cbln4)	Mus musculus	GO:0009306~protein secretion,
P80317	chaperonin containing Tcp1, subunit 6a (zeta)(Cct6a)	Mus musculus	GO:0006457~protein folding,GO:0007339~binding of sperm to zona pellucida,GO:0032212~positive regulation of telomere maintenance via telomerase,GO:0050821~protein stabilization,GO:1901998~toxin transport,GO:1904851~positive regulation of establishment of protein localization to telomere,GO:1904871~positive regulation of protein localization to Cajal body,GO:1904874~positive regulation of telomeras…
P09240	cholecystokinin(Cck)	Mus musculus	GO:0001662~behavioral fear response,GO:0001764~neuron migration,GO:0001836~release of cytochrome c from mitochondria,GO:0006915~apoptotic process,GO:0006919~activation of cysteine-type endopeptidase activity involved in apoptotic process,GO:0007205~protein kinase C-activating G-protein coupled receptor signaling pathway,GO:0007409~axonogenesis,GO:0008284~positive regulation of cell proliferation,…
P26339	chromogranin A(Chga)	Mus musculus	GO:0002026~regulation of the force of heart contraction,GO:0002551~mast cell chemotaxis,GO:0006996~organelle organization,GO:0030816~positive regulation of cAMP metabolic process,GO:0032762~mast cell cytokine production,GO:0033604~negative regulation of catecholamine secretion,GO:0043303~mast cell degranulation,GO:0045576~mast cell activation,GO:0045908~negative regulation of vasodilation,GO:0050…
P18760	cofilin 1, non-muscle(Cfl1)	Mus musculus	GO:0000281~mitotic cytokinesis,GO:0001755~neural crest cell migration,GO:0001842~neural fold formation,GO:0002576~platelet degranulation,GO:0006468~protein phosphorylation,GO:0006606~protein import into nucleus,GO:0006928~movement of cell or subcellular component,GO:0007010~cytoskeleton organization,GO:0007015~actin filament organization,GO:0009615~response to virus,GO:0022604~regulation of cell …
O35658	complement component 1, q subcomponent binding protein(C1qbp)	Mus musculus	GO:0000122~negative regulation of transcription from RNA polymerase II promoter,GO:0002250~adaptive immune response,GO:0002376~immune system process,GO:0006351~transcription, DNA-templated,GO:0006355~regulation of transcription, DNA-templated,GO:0006397~mRNA processing,GO:0006915~apoptotic process,GO:0006958~complement activation, classical pathway,GO:0008380~RNA splicing,GO:0014065~phosphatidyli…
P63040	complexin 1(Cplx1)	Mus musculus	GO:0006810~transport,GO:0006836~neurotransmitter transport,GO:0006887~exocytosis,GO:0016079~synaptic vesicle exocytosis,GO:0030073~insulin secretion,
Q04447	creatine kinase, brain(Ckb)	Mus musculus	GO:0016310~phosphorylation,GO:0021762~substantia nigra development,GO:0030644~cellular chloride ion homeostasis,
P23927	crystallin, alpha B(Cryab)	Mus musculus	GO:0001666~response to hypoxia,GO:0002088~lens development in camera-type eye,GO:0006457~protein folding,GO:0007021~tubulin complex assembly,GO:0007517~muscle organ development,GO:0007568~aging,GO:0010629~negative regulation of gene expression,GO:0010941~regulation of cell death,GO:0030308~negative regulation of cell growth,GO:0031109~microtubule polymerization or depolymerization,GO:0032355~resp…
Q9DCT8	cysteine rich protein 2(Crip2)	Mus musculus	GO:0008284~positive regulation of cell proliferation,GO:0030097~hemopoiesis,
P56393	cytochrome c oxidase subunit VIIb(Cox7b)	Mus musculus	GO:0007417~central nervous system development,GO:1902600~hydrogen ion transmembrane transport,
P43024	cytochrome c oxidase subunit VIa polypeptide 1(Cox6a1)	Mus musculus	GO:0006123~mitochondrial electron transport, cytochrome c to oxygen,GO:0009060~aerobic respiration,
P12787	cytochrome c oxidase subunit Va(Cox5a)	Mus musculus	GO:0006123~mitochondrial electron transport, cytochrome c to oxygen,
P56391	cytochrome c oxidase, subunit VIb polypeptide 1(Cox6b1)	Mus musculus	GO:0021762~substantia nigra development,
P62897	cytochrome c, somatic(Cycs)	Mus musculus	GO:0006122~mitochondrial electron transport, ubiquinol to cytochrome c,GO:0006123~mitochondrial electron transport, cytochrome c to oxygen,GO:0006915~apoptotic process,GO:0008635~activation of cysteine-type endopeptidase activity involved in apoptotic process by cytochrome c,GO:0042743~hydrogen peroxide metabolic process,GO:0055114~oxidation-reduction process,
P31786	diazepam binding inhibitor(Dbi)	Mus musculus	GO:0001662~behavioral fear response,GO:0001942~hair follicle development,GO:0006641~triglyceride metabolic process,GO:0006810~transport,GO:0007611~learning or memory,GO:0014009~glial cell proliferation,GO:0021670~lateral ventricle development,GO:0031999~negative regulation of fatty acid beta-oxidation,GO:0032228~regulation of synaptic transmission, GABAergic,GO:0036151~phosphatidylcholine acyl-ch…
O08553	dihydropyrimidinase-like 2(Dpysl2)	Mus musculus	GO:0001975~response to amphetamine,GO:0006897~endocytosis,GO:0007010~cytoskeleton organization,GO:0007275~multicellular organism development,GO:0007399~nervous system development,GO:0007411~axon guidance,GO:0007420~brain development,GO:0010975~regulation of neuron projection development,GO:0014049~positive regulation of glutamate secretion,GO:0021510~spinal cord development,GO:0021772~olfactory b…
Q9CWS0	dimethylarginine dimethylaminohydrolase 1(Ddah1)	Mus musculus	GO:0000052~citrulline metabolic process,GO:0003073~regulation of systemic arterial blood pressure,GO:0006525~arginine metabolic process,GO:0006527~arginine catabolic process,GO:0006809~nitric oxide biosynthetic process,GO:0017014~protein nitrosylation,GO:0045429~positive regulation of nitric oxide biosynthetic process,GO:0045766~positive regulation of angiogenesis,
Q62418	drebrin-like(Dbnl)	Mus musculus	GO:0002250~adaptive immune response,GO:0002376~immune system process,GO:0006810~transport,GO:0006897~endocytosis,GO:0006898~receptor-mediated endocytosis,GO:0007416~synapse assembly,GO:0016601~Rac protein signal transduction,GO:0048812~neuron projection morphogenesis,GO:0051014~actin filament severing,GO:0051016~barbed-end actin filament capping,GO:0051017~actin filament bundle assembly,GO:007180…
P39053	dynamin 1(Dnm1)	Mus musculus	GO:0000266~mitochondrial fission,GO:0002031~G-protein coupled receptor internalization,GO:0003374~dynamin polymerization involved in mitochondrial fission,GO:0006897~endocytosis,GO:0006898~receptor-mediated endocytosis,GO:0007032~endosome organization,GO:0007605~sensory perception of sound,GO:0008344~adult locomotory behavior,GO:0031623~receptor internalization,GO:0051262~protein tetramerization,…
P17183	enolase 2, gamma neuronal(Eno2)	Mus musculus	GO:0006096~glycolytic process,
Q8BGD9	eukaryotic translation initiation factor 4B(Eif4b)	Mus musculus	GO:0001731~formation of translation preinitiation complex,GO:0002181~cytoplasmic translation,GO:0006412~translation,GO:0006413~translational initiation,GO:0097010~eukaryotic translation initiation factor 4F complex assembly,
P70445	eukaryotic translation initiation factor 4E binding protein 2(Eif4ebp2)	Mus musculus	GO:0006417~regulation of translation,GO:0006446~regulation of translational initiation,GO:0007613~memory,GO:0008286~insulin receptor signaling pathway,GO:0017148~negative regulation of translation,GO:0019933~cAMP-mediated signaling,GO:0031929~TOR signaling,GO:0035176~social behavior,GO:0045947~negative regulation of translational initiation,GO:0048167~regulation of synaptic plasticity,GO:0050804~…
Q9WUK2	eukaryotic translation initiation factor 4H(Eif4h)	Mus musculus	GO:0001731~formation of translation preinitiation complex,GO:0002181~cytoplasmic translation,GO:0006412~translation,GO:0006413~translational initiation,GO:0019953~sexual reproduction,GO:0048589~developmental growth,GO:0097010~eukaryotic translation initiation factor 4F complex assembly,GO:0098609~cell-cell adhesion,
P06745	glucose phosphate isomerase 1(Gpi1)	Mus musculus	GO:0001525~angiogenesis,GO:0001701~in utero embryonic development,GO:0001707~mesoderm formation,GO:0005975~carbohydrate metabolic process,GO:0006094~gluconeogenesis,GO:0006096~glycolytic process,GO:0007611~learning or memory,GO:0019242~methylglyoxal biosynthetic process,GO:0032355~response to estradiol,GO:0032570~response to progesterone,GO:0033574~response to testosterone,GO:0034101~erythrocyte …
P70699	glucosidase, alpha, acid(Gaa)	Mus musculus	GO:0002026~regulation of the force of heart contraction,GO:0002086~diaphragm contraction,GO:0003007~heart morphogenesis,GO:0005975~carbohydrate metabolic process,GO:0005977~glycogen metabolic process,GO:0005980~glycogen catabolic process,GO:0006941~striated muscle contraction,GO:0007040~lysosome organization,GO:0007626~locomotory behavior,GO:0008152~metabolic process,GO:0009888~tissue development…
P16858	glyceraldehyde-3-phosphate dehydrogenase(Gapdh)	Mus musculus	GO:0000226~microtubule cytoskeleton organization,GO:0005975~carbohydrate metabolic process,GO:0006006~glucose metabolic process,GO:0006094~gluconeogenesis,GO:0006096~glycolytic process,GO:0006915~apoptotic process,GO:0007275~multicellular organism development,GO:0017148~negative regulation of translation,GO:0035606~peptidyl-cysteine S-trans-nitrosylation,GO:0050821~protein stabilization,GO:005140…
P63213	guanine nucleotide binding protein (G protein), gamma 2(Gng2)	Mus musculus	GO:0007165~signal transduction,GO:0007186~G-protein coupled receptor signaling pathway,GO:0008283~cell proliferation,
Q61016	guanine nucleotide binding protein (G protein), gamma 7(Gng7)	Mus musculus	GO:0001662~behavioral fear response,GO:0007165~signal transduction,GO:0007168~receptor guanylyl cyclase signaling pathway,GO:0007186~G-protein coupled receptor signaling pathway,GO:0007626~locomotory behavior,GO:0045761~regulation of adenylate cyclase activity,
Q64433	heat shock protein 1 (chaperonin 10)(Hspe1)	Mus musculus	GO:0001649~osteoblast differentiation,GO:0006457~protein folding,GO:0006986~response to unfolded protein,GO:0051085~chaperone mediated protein folding requiring cofactor,
P01942	hemoglobin alpha, adult chain 1(Hba-a1)	Mus musculus	GO:0001701~in utero embryonic development,GO:0035634~response to stilbenoid,GO:0048821~erythrocyte development,GO:0098869~cellular oxidant detoxification,
P02088	hemoglobin, beta adult major chain(Hbb-b1)	Mus musculus	GO:0010999~regulation of eIF2 alpha phosphorylation by heme,GO:0015671~oxygen transport,GO:0030097~hemopoiesis,GO:0048821~erythrocyte development,
Q6ZWY9	histone cluster 1, H2bc(Hist1h2bc)	Mus musculus	GO:0002227~innate immune response in mucosa,GO:0006334~nucleosome assembly,GO:0019731~antibacterial humoral response,GO:0050830~defense response to Gram-positive bacterium,
P34884	macrophage migration inhibitory factor(Mif)	Mus musculus	GO:0001516~prostaglandin biosynthetic process,GO:0001934~positive regulation of protein phosphorylation,GO:0002035~brain renin-angiotensin system,GO:0002376~immune system process,GO:0002675~positive regulation of acute inflammatory response,GO:0002821~positive regulation of adaptive immune response,GO:0002906~negative regulation of mature B cell apoptotic process,GO:0006954~inflammatory response,…
P08249	malate dehydrogenase 2, NAD (mitochondrial)(Mdh2)	Mus musculus	GO:0005975~carbohydrate metabolic process,GO:0006099~tricarboxylic acid cycle,GO:0006107~oxaloacetate metabolic process,GO:0006108~malate metabolic process,GO:0006475~internal protein amino acid acetylation,GO:0006734~NADH metabolic process,GO:0019752~carboxylic acid metabolic process,GO:0055114~oxidation-reduction process,
P20357	microtubule-associated protein 2(Map2)	Mus musculus	GO:0001578~microtubule bundle formation,GO:0007409~axonogenesis,GO:0016358~dendrite development,GO:0021954~central nervous system neuron development,GO:0030010~establishment of cell polarity,GO:0050770~regulation of axonogenesis,GO:0071310~cellular response to organic substance,
Q7TSJ2	microtubule-associated protein 6(Map6)	Mus musculus	GO:0000226~microtubule cytoskeleton organization,GO:0006810~transport,GO:0032418~lysosome localization,GO:0048813~dendrite morphogenesis,
P10637	microtubule-associated protein tau(Mapt)	Mus musculus	GO:0000226~microtubule cytoskeleton organization,GO:0001764~neuron migration,GO:0006915~apoptotic process,GO:0007409~axonogenesis,GO:0007584~response to nutrient,GO:0007628~adult walking behavior,GO:0008088~axo-dendritic transport,GO:0008631~intrinsic apoptotic signaling pathway in response to oxidative stress,GO:0010033~response to organic substance,GO:0010506~regulation of autophagy,GO:0031116~…
P04370	myelin basic protein(Mbp)	Mus musculus	GO:0007417~central nervous system development,GO:0007605~sensory perception of sound,GO:0009636~response to toxic substance,GO:0021762~substantia nigra development,GO:0042552~myelination,GO:0061024~membrane organization,
P20917	myelin-associated glycoprotein(Mag)	Mus musculus	GO:0007155~cell adhesion,GO:0010977~negative regulation of neuron projection development,GO:0031643~positive regulation of myelination,GO:0045665~negative regulation of neuron differentiation,GO:0048711~positive regulation of astrocyte differentiation,GO:0071260~cellular response to mechanical stimulus,
Q9CQ19	myosin, light polypeptide 9, regulatory(Myl9)	Mus musculus	GO:0070527~platelet aggregation,
P62774	myotrophin(Mtpn)	Mus musculus	GO:0006584~catecholamine metabolic process,GO:0010557~positive regulation of macromolecule biosynthetic process,GO:0010613~positive regulation of cardiac muscle hypertrophy,GO:0016049~cell growth,GO:0021707~cerebellar granule cell differentiation,GO:0030307~positive regulation of cell growth,GO:0043403~skeletal muscle tissue regeneration,GO:0051092~positive regulation of NF-kappaB transcription f…
Q9DC07	nebulette(Nebl)	Mus musculus	GO:0071691~cardiac muscle thin filament assembly,
P08551	neurofilament, light polypeptide(Nefl)	Mus musculus	GO:0000226~microtubule cytoskeleton organization,GO:0008089~anterograde axonal transport,GO:0008090~retrograde axonal transport,GO:0009636~response to toxic substance,GO:0014012~peripheral nervous system axon regeneration,GO:0019896~axonal transport of mitochondrion,GO:0021510~spinal cord development,GO:0021766~hippocampus development,GO:0021987~cerebral cortex development,GO:0031133~regulation o…
P60761	neurogranin(Nrgn)	Mus musculus	GO:0008306~associative learning,GO:0021537~telencephalon development,GO:0035556~intracellular signal transduction,GO:1900273~positive regulation of long-term synaptic potentiation,
P17742	peptidylprolyl isomerase A(Ppia)	Mus musculus	GO:0000413~protein peptidyl-prolyl isomerization,GO:0006457~protein folding,GO:0030182~neuron differentiation,GO:0034389~lipid particle organization,GO:0045069~regulation of viral genome replication,GO:0045070~positive regulation of viral genome replication,GO:0050714~positive regulation of protein secretion,
P99029	peroxiredoxin 5(Prdx5)	Mus musculus	GO:0006979~response to oxidative stress,GO:0016480~negative regulation of transcription from RNA polymerase III promoter,GO:0034614~cellular response to reactive oxygen species,GO:0042744~hydrogen peroxide catabolic process,GO:0043066~negative regulation of apoptotic process,GO:0045454~cell redox homeostasis,GO:0055114~oxidation-reduction process,
O08709	peroxiredoxin 6(Prdx6)	Mus musculus	GO:0000302~response to reactive oxygen species,GO:0006629~lipid metabolic process,GO:0008152~metabolic process,GO:0016042~lipid catabolic process,GO:0032060~bleb assembly,GO:0042744~hydrogen peroxide catabolic process,GO:0045454~cell redox homeostasis,GO:0055114~oxidation-reduction process,GO:0098609~cell-cell adhesion,
P70296	phosphatidylethanolamine binding protein 1(Pebp1)	Mus musculus	GO:0000165~MAPK cascade,GO:0001505~regulation of neurotransmitter levels,GO:0001933~negative regulation of protein phosphorylation,GO:0002026~regulation of the force of heart contraction,GO:0006979~response to oxidative stress,GO:0007286~spermatid development,GO:0007568~aging,GO:0009408~response to heat,GO:0009611~response to wounding,GO:0009636~response to toxic substance,GO:0010466~negative reg…
Q9QYX7	piccolo (presynaptic cytomatrix protein)(Pclo)	Mus musculus	GO:0007010~cytoskeleton organization,GO:0007416~synapse assembly,GO:0016080~synaptic vesicle targeting,GO:0017157~regulation of exocytosis,GO:0019933~cAMP-mediated signaling,GO:0030073~insulin secretion,GO:0035418~protein localization to synapse,
Q9DCU2	plasma membrane proteolipid(Pllp)	Mus musculus	GO:0006810~transport,GO:0006811~ion transport,GO:0009611~response to wounding,GO:0042552~myelination,
Q9JM63	potassium inwardly-rectifying channel, subfamily J, member 10(Kcnj10)	Mus musculus	GO:0006810~transport,GO:0006811~ion transport,GO:0006813~potassium ion transport,GO:0007601~visual perception,GO:0007628~adult walking behavior,GO:0010107~potassium ion import,GO:0014003~oligodendrocyte development,GO:0022010~central nervous system myelination,GO:0034765~regulation of ion transmembrane transport,GO:0042391~regulation of membrane potential,GO:0048169~regulation of long-term neuron…
Q08460	potassium large conductance calcium-activated channel, subfamily M, alpha member 1(Kcnma1)	Mus musculus	GO:0001666~response to hypoxia,GO:0006810~transport,GO:0006811~ion transport,GO:0006813~potassium ion transport,GO:0006970~response to osmotic stress,GO:0007268~chemical synaptic transmission,GO:0007605~sensory perception of sound,GO:0007623~circadian rhythm,GO:0007628~adult walking behavior,GO:0009268~response to pH,GO:0019058~viral life cycle,GO:0019228~neuronal action potential,GO:0030007~cell…
Q9CWM4	prefoldin 1(Pfdn1)	Mus musculus	GO:0006457~protein folding,GO:0021537~telencephalon development,GO:0021549~cerebellum development,GO:0030036~actin cytoskeleton organization,GO:0042113~B cell activation,
Q64387	prepronociceptin(Pnoc)	Mus musculus	GO:0007218~neuropeptide signaling pathway,GO:0007268~chemical synaptic transmission,GO:0007565~female pregnancy,GO:0007600~sensory perception,
Q9QXV0	proprotein convertase subtilisin/kexin type 1 inhibitor(Pcsk1n)	Mus musculus	GO:0002021~response to dietary excess,GO:0007218~neuropeptide signaling pathway,GO:0009409~response to cold,GO:0010951~negative regulation of endopeptidase activity,GO:0016486~peptide hormone processing,
P21661	proprotein convertase subtilisin/kexin type 2(Pcsk2)	Mus musculus	GO:0006508~proteolysis,GO:0007399~nervous system development,GO:0016485~protein processing,GO:0016486~peptide hormone processing,GO:0016540~protein autoprocessing,GO:0030070~insulin processing,GO:0032455~nerve growth factor processing,GO:0034230~enkephalin processing,GO:0034231~islet amyloid polypeptide processing,
Q60692	proteasome (prosome, macropain) subunit, beta type 6(Psmb6)	Mus musculus	GO:0002479~antigen processing and presentation of exogenous peptide antigen via MHC class I, TAP-dependent,GO:0006508~proteolysis,GO:0051603~proteolysis involved in cellular protein catabolic process,GO:0098609~cell-cell adhesion,
Q61644	protein kinase C and casein kinase substrate in neurons 1(Pacsin1)	Mus musculus	GO:0006897~endocytosis,GO:0007010~cytoskeleton organization,GO:0007015~actin filament organization,GO:0007165~signal transduction,GO:0045806~negative regulation of endocytosis,GO:0048488~synaptic vesicle endocytosis,GO:0048666~neuron development,GO:0048812~neuron projection morphogenesis,GO:0072657~protein localization to membrane,GO:0090002~establishment of protein localization to plasma membran…
P14869	ribosomal protein, large, P0(Rplp0)	Mus musculus	GO:0002181~cytoplasmic translation,GO:0007595~lactation,GO:0010269~response to selenium ion,GO:0042254~ribosome biogenesis,GO:0071320~cellular response to cAMP,GO:0071353~cellular response to interleukin-4,GO:1904401~cellular response to Thyroid stimulating hormone,GO:1904628~cellular response to phorbol 13-acetate 12-myristate,
Q9CZC8	secernin 1(Scrn1)	Mus musculus	GO:0006508~proteolysis,GO:0006887~exocytosis,
Q8K021	secretory carrier membrane protein 1(Scamp1)	Mus musculus	GO:0006810~transport,GO:0006887~exocytosis,GO:0006897~endocytosis,GO:0015031~protein transport,
P97797	signal-regulatory protein alpha(Sirpa)	Mus musculus	GO:0002244~hematopoietic progenitor cell differentiation,GO:0006910~phagocytosis, recognition,GO:0006911~phagocytosis, engulfment,GO:0006928~movement of cell or subcellular component,GO:0007010~cytoskeleton organization,GO:0007015~actin filament organization,GO:0007160~cell-matrix adhesion,GO:0016477~cell migration,GO:0050766~positive regulation of phagocytosis,
Q8BLE7	solute carrier family 17 (sodium-dependent inorganic phosphate cotransporter), member 6(Slc17a6)	Mus musculus	GO:0001504~neurotransmitter uptake,GO:0006810~transport,GO:0006811~ion transport,GO:0006814~sodium ion transport,GO:0006836~neurotransmitter transport,GO:0055085~transmembrane transport,
Q9D6M3	solute carrier family 25 (mitochondrial carrier, glutamate), member 22(Slc25a22)	Mus musculus	GO:0006412~translation,GO:0006810~transport,GO:0015813~L-glutamate transport,GO:0055085~transmembrane transport,
Q60738	solute carrier family 30 (zinc transporter), member 1(Slc30a1)	Mus musculus	GO:0001701~in utero embryonic development,GO:0006810~transport,GO:0006811~ion transport,GO:0006812~cation transport,GO:0006829~zinc II ion transport,GO:0006874~cellular calcium ion homeostasis,GO:0006882~cellular zinc ion homeostasis,GO:0010043~response to zinc ion,GO:0046929~negative regulation of neurotransmitter secretion,GO:0055085~transmembrane transport,GO:0061088~regulation of sequestering…
P97441	solute carrier family 30 (zinc transporter), member 3(Slc30a3)	Mus musculus	GO:0006810~transport,GO:0006811~ion transport,GO:0006812~cation transport,GO:0006829~zinc II ion transport,GO:0010312~detoxification of zinc ion,GO:0032119~sequestering of zinc ion,GO:0051050~positive regulation of transport,GO:0055085~transmembrane transport,GO:0061088~regulation of sequestering of zinc ion,
Q9WTR6	solute carrier family 7 (cationic amino acid transporter, y+ system), member 11(Slc7a11)	Mus musculus	GO:0003333~amino acid transmembrane transport,GO:0006810~transport,GO:0006865~amino acid transport,GO:0006979~response to oxidative stress,GO:0007420~brain development,GO:0009636~response to toxic substance,GO:0035094~response to nicotine,GO:0070306~lens fiber cell differentiation,GO:0070527~platelet aggregation,GO:0089711~L-glutamate transmembrane transport,
O88935	synapsin I(Syn1)	Mus musculus	GO:0007269~neurotransmitter secretion,GO:0048172~regulation of short-term neuronal synaptic plasticity,
Q64332	synapsin II(Syn2)	Mus musculus	GO:0007269~neurotransmitter secretion,
P60879	synaptosomal-associated protein 25(Snap25)	Mus musculus	GO:0007269~neurotransmitter secretion,GO:0007616~long-term memory,GO:0007626~locomotory behavior,GO:0008306~associative learning,GO:0010975~regulation of neuron projection development,GO:0016082~synaptic vesicle priming,GO:0016197~endosomal transport,GO:0030431~sleep,GO:0031629~synaptic vesicle fusion to presynaptic active zone membrane,GO:0031915~positive regulation of synaptic plasticity,GO:004…
Q61548	synaptosomal-associated protein 91(Snap91)	Mus musculus	GO:0006810~transport,GO:0007163~establishment or maintenance of cell polarity,GO:0007268~chemical synaptic transmission,GO:0007269~neurotransmitter secretion,GO:0007409~axonogenesis,GO:0015031~protein transport,GO:0030100~regulation of endocytosis,GO:0048268~clathrin coat assembly,GO:0051223~regulation of protein transport,GO:2000369~regulation of clathrin-mediated endocytosis,
Q9ER00	syntaxin 12(Stx12)	Mus musculus	GO:0000045~autophagosome assembly,GO:0006810~transport,GO:0006886~intracellular protein transport,GO:0006906~vesicle fusion,GO:0015031~protein transport,GO:0016192~vesicle-mediated transport,GO:0033344~cholesterol efflux,GO:0048278~vesicle docking,GO:0050821~protein stabilization,GO:0061025~membrane fusion,
O55042	synuclein, alpha(Snca)	Mus musculus	GO:0001774~microglial cell activation,GO:0001921~positive regulation of receptor recycling,GO:0001933~negative regulation of protein phosphorylation,GO:0001956~positive regulation of neurotransmitter secretion,GO:0001963~synaptic transmission, dopaminergic,GO:0006631~fatty acid metabolic process,GO:0006638~neutral lipid metabolic process,GO:0006644~phospholipid metabolic process,GO:0006919~activa…
Q91ZZ3	synuclein, beta(Sncb)	Mus musculus	GO:0007268~chemical synaptic transmission,GO:0042417~dopamine metabolic process,GO:0043524~negative regulation of neuron apoptotic process,GO:0050808~synapse organization,
Q6ZWY8	thymosin, beta 10(Tmsb10)	Mus musculus	GO:0007015~actin filament organization,GO:0030036~actin cytoskeleton organization,GO:0042989~sequestering of actin monomers,
P62073	translocase of inner mitochondrial membrane 10(Timm10)	Mus musculus	GO:0006810~transport,GO:0015031~protein transport,GO:0045039~protein import into mitochondrial inner membrane,GO:0072321~chaperone-mediated protein transport,
P17751	triosephosphate isomerase 1(Tpi1)	Mus musculus	GO:0006006~glucose metabolic process,GO:0006094~gluconeogenesis,GO:0006096~glycolytic process,GO:0006098~pentose-phosphate shunt,GO:0007275~multicellular organism development,GO:0008152~metabolic process,GO:0009790~embryo development,GO:0019563~glycerol catabolic process,GO:0019682~glyceraldehyde-3-phosphate metabolic process,GO:0046166~glyceraldehyde-3-phosphate biosynthetic process,
Q7TQD2	tubulin polymerization promoting protein(Tppp)	Mus musculus	GO:0001578~microtubule bundle formation,GO:0031334~positive regulation of protein complex assembly,GO:0032273~positive regulation of protein polymerization,GO:0046785~microtubule polymerization,
P68369	tubulin, alpha 1A(Tuba1a)	Mus musculus	GO:0007017~microtubule-based process,
Q7TMM9	tubulin, beta 2A class IIA(Tubb2a)	Mus musculus	GO:0007017~microtubule-based process,
P68372	tubulin, beta 4B class IVB(Tubb4b)	Mus musculus	GO:0007017~microtubule-based process,
P63028	tumor protein, translationally-controlled 1(Tpt1)	Mus musculus	GO:0019827~stem cell population maintenance,GO:0030154~cell differentiation,GO:1902230~negative regulation of intrinsic apoptotic signaling pathway in response to DNA damage,GO:2000384~negative regulation of ectoderm development,
Q9D3A9	tweety family member 1(Ttyh1)	Mus musculus	GO:0006810~transport,GO:0006811~ion transport,GO:0006821~chloride transport,GO:0007067~mitotic nuclear division,GO:0007155~cell adhesion,GO:0016337~single organismal cell-cell adhesion,GO:0031589~cell-substrate adhesion,GO:0044070~regulation of anion transport,GO:0046847~filopodium assembly,GO:1902476~chloride transmembrane transport,
Q6P5F7	tweety family member 3(Ttyh3)	Mus musculus	GO:0006810~transport,GO:0006811~ion transport,GO:0006821~chloride transport,
Q9CQV8	tyrosine 3-monooxygenase/tryptophan 5-monooxygenase activation protein, beta polypeptide(Ywhab)	Mus musculus	GO:0006605~protein targeting,GO:0035308~negative regulation of protein dephosphorylation,GO:0043085~positive regulation of catalytic activity,GO:0045744~negative regulation of G-protein coupled receptor protein signaling pathway,GO:0045892~negative regulation of transcription, DNA-templated,GO:0051220~cytoplasmic sequestering of protein,GO:0051291~protein heterooligomerization,GO:0098609~cell-cel…
P61982	tyrosine 3-monooxygenase/tryptophan 5-monooxygenase activation protein, gamma polypeptide(Ywhag)	Mus musculus	GO:0006605~protein targeting,GO:0032869~cellular response to insulin stimulus,GO:0045664~regulation of neuron differentiation,GO:0048167~regulation of synaptic plasticity,
Q9DB77	ubiquinol cytochrome c reductase core protein 2(Uqcrc2)	Mus musculus	GO:0006122~mitochondrial electron transport, ubiquinol to cytochrome c,GO:0006508~proteolysis,GO:0006810~transport,GO:0009060~aerobic respiration,GO:0016485~protein processing,GO:0055114~oxidation-reduction process,
Q9D855	ubiquinol-cytochrome c reductase binding protein(Uqcrb)	Mus musculus	GO:0006122~mitochondrial electron transport, ubiquinol to cytochrome c,GO:0006810~transport,GO:0009060~aerobic respiration,GO:0034551~mitochondrial respiratory chain complex III assembly,GO:0055114~oxidation-reduction process,GO:1902600~hydrogen ion transmembrane transport,
P61089	ubiquitin-conjugating enzyme E2N(Ube2n)	Mus musculus	GO:0000724~double-strand break repair via homologous recombination,GO:0000729~DNA double-strand break processing,GO:0006281~DNA repair,GO:0006301~postreplication repair,GO:0006511~ubiquitin-dependent protein catabolic process,GO:0006974~cellular response to DNA damage stimulus,GO:0016567~protein ubiquitination,GO:0016574~histone ubiquitination,GO:0031058~positive regulation of histone modificatio…
Q60932	voltage-dependent anion channel 1(Vdac1)	Mus musculus	GO:0001662~behavioral fear response,GO:0006810~transport,GO:0006811~ion transport,GO:0006820~anion transport,GO:0006851~mitochondrial calcium ion transport,GO:0006915~apoptotic process,GO:0007268~chemical synaptic transmission,GO:0007270~neuron-neuron synaptic transmission,GO:0007612~learning,GO:0030855~epithelial cell differentiation,GO:0044070~regulation of anion transport,GO:0055085~transmembr…

## Sheet: CC
ID	Gene Name	Species	GOTERM_CC_DIRECT
P56480	ATP synthase, H+ transporting mitochondrial F1 complex, beta subunit(Atp5b)	Mus musculus	GO:0000275~mitochondrial proton-transporting ATP synthase complex, catalytic core F(1),GO:0005634~nucleus,GO:0005739~mitochondrion,GO:0005743~mitochondrial inner membrane,GO:0005753~mitochondrial proton-transporting ATP synthase complex,GO:0005886~plasma membrane,GO:0009986~cell surface,GO:0016020~membrane,GO:0031012~extracellular matrix,GO:0031966~mitochondrial membrane,GO:0042645~mitochondrial …
Q9DCX2	ATP synthase, H+ transporting, mitochondrial F0 complex, subunit D(Atp5h)	Mus musculus	GO:0000274~mitochondrial proton-transporting ATP synthase, stator stalk,GO:0000276~mitochondrial proton-transporting ATP synthase complex, coupling factor F(o),GO:0005654~nucleoplasm,GO:0005737~cytoplasm,GO:0005739~mitochondrion,GO:0005743~mitochondrial inner membrane,GO:0005753~mitochondrial proton-transporting ATP synthase complex,GO:0016020~membrane,GO:0043209~myelin sheath,GO:0045263~proton-t…
P97450	ATP synthase, H+ transporting, mitochondrial F0 complex, subunit F(Atp5j)	Mus musculus	GO:0000276~mitochondrial proton-transporting ATP synthase complex, coupling factor F(o),GO:0005739~mitochondrion,GO:0005743~mitochondrial inner membrane,GO:0005753~mitochondrial proton-transporting ATP synthase complex,GO:0016020~membrane,GO:0045263~proton-transporting ATP synthase complex, coupling factor F(o),
Q9D3D9	ATP synthase, H+ transporting, mitochondrial F1 complex, delta subunit(Atp5d)	Mus musculus	GO:0000275~mitochondrial proton-transporting ATP synthase complex, catalytic core F(1),GO:0005739~mitochondrion,GO:0005740~mitochondrial envelope,GO:0005743~mitochondrial inner membrane,GO:0005753~mitochondrial proton-transporting ATP synthase complex,GO:0016020~membrane,GO:0045259~proton-transporting ATP synthase complex,GO:0045261~proton-transporting ATP synthase complex, catalytic core F(1),
P56382	ATP synthase, H+ transporting, mitochondrial F1 complex, epsilon subunit(Atp5e)	Mus musculus	GO:0000275~mitochondrial proton-transporting ATP synthase complex, catalytic core F(1),GO:0005739~mitochondrion,GO:0005743~mitochondrial inner membrane,GO:0005753~mitochondrial proton-transporting ATP synthase complex,GO:0016020~membrane,GO:0045261~proton-transporting ATP synthase complex, catalytic core F(1),
Q06185	ATP synthase, H+ transporting, mitochondrial F1F0 complex, subunit E(Atp5k)	Mus musculus	GO:0000276~mitochondrial proton-transporting ATP synthase complex, coupling factor F(o),GO:0005739~mitochondrion,GO:0005743~mitochondrial inner membrane,GO:0005753~mitochondrial proton-transporting ATP synthase complex,GO:0016020~membrane,GO:0045263~proton-transporting ATP synthase complex, coupling factor F(o),
Q9CR51	ATPase, H+ transporting, lysosomal V1 subunit G1(Atp6v1g1)	Mus musculus	GO:0005622~intracellular,GO:0005765~lysosomal membrane,GO:0005829~cytosol,GO:0005886~plasma membrane,GO:0008021~synaptic vesicle,GO:0016471~vacuolar proton-transporting V-type ATPase complex,GO:0070062~extracellular exosome,
Q9WTT4	ATPase, H+ transporting, lysosomal V1 subunit G2(Atp6v1g2)	Mus musculus	GO:0016471~vacuolar proton-transporting V-type ATPase complex,GO:0030285~integral component of synaptic vesicle membrane,GO:0042470~melanosome,
P26883	FK506 binding protein 1a(Fkbp1a)	Mus musculus	GO:0005737~cytoplasm,GO:0005829~cytosol,GO:0016020~membrane,GO:0030018~Z disc,GO:0031012~extracellular matrix,GO:0033017~sarcoplasmic reticulum membrane,GO:0043231~intracellular membrane-bounded organelle,GO:0043679~axon terminus,GO:0070062~extracellular exosome,
Q61792	LIM and SH3 protein 1(Lasp1)	Mus musculus	GO:0005737~cytoplasm,GO:0005856~cytoskeleton,GO:0005913~cell-cell adherens junction,GO:0005925~focal adhesion,GO:0030864~cortical actin cytoskeleton,GO:0070062~extracellular exosome,
A2AG50	MAP7 domain containing 2(Map7d2)	Mus musculus	GO:0015630~microtubule cytoskeleton,
Q9CWZ7	N-ethylmaleimide sensitive fusion protein attachment protein gamma(Napg)	Mus musculus	GO:0005622~intracellular,GO:0005739~mitochondrion,GO:0005765~lysosomal membrane,GO:0005774~vacuolar membrane,GO:0016020~membrane,GO:0031201~SNARE complex,GO:0043209~myelin sheath,GO:0070062~extracellular exosome,
Q9Z1P6	NADH dehydrogenase (ubiquinone) 1 alpha subcomplex, 7 (B14.5a)(Ndufa7)	Mus musculus	GO:0005739~mitochondrion,GO:0005743~mitochondrial inner membrane,GO:0005747~mitochondrial respiratory chain complex I,GO:0005761~mitochondrial ribosome,GO:0016020~membrane,GO:0070469~respiratory chain,
P52503	NADH dehydrogenase (ubiquinone) Fe-S protein 6(Ndufs6)	Mus musculus	GO:0005739~mitochondrion,GO:0005743~mitochondrial inner membrane,GO:0005747~mitochondrial respiratory chain complex I,GO:0016020~membrane,GO:0070469~respiratory chain,
P62827	RAN, member RAS oncogene family(Ran)	Mus musculus	GO:0000785~chromatin,GO:0001673~male germ cell nucleus,GO:0002177~manchette,GO:0005634~nucleus,GO:0005635~nuclear envelope,GO:0005643~nuclear pore,GO:0005654~nucleoplasm,GO:0005730~nucleolus,GO:0005737~cytoplasm,GO:0005814~centriole,GO:0005913~cell-cell adherens junction,GO:0016020~membrane,GO:0030496~midbody,GO:0031012~extracellular matrix,GO:0036126~sperm flagellum,GO:0042470~melanosome,GO:0042…
Q8R404	RIKEN cDNA 2410015M20 gene(2410015M20Rik)	Mus musculus	GO:0005739~mitochondrion,GO:0005743~mitochondrial inner membrane,GO:0016020~membrane,GO:0016021~integral component of membrane,GO:0044284~mitochondrial crista junction,GO:0061617~MICOS complex,
O89086	RNA binding motif protein 3(Rbm3)	Mus musculus	GO:0005634~nucleus,GO:0005654~nucleoplasm,GO:0005730~nucleolus,GO:0005737~cytoplasm,GO:0015934~large ribosomal subunit,GO:0030425~dendrite,GO:0042995~cell projection,
Q68FL4	S-adenosylhomocysteine hydrolase-like 2(Ahcyl2)	Mus musculus	GO:0005737~cytoplasm,GO:0005783~endoplasmic reticulum,GO:0005829~cytosol,GO:0043005~neuron projection,GO:0043231~intracellular membrane-bounded organelle,
Q8CFE4	SCY1-like 2 (S. cerevisiae)(Scyl2)	Mus musculus	GO:0005737~cytoplasm,GO:0005768~endosome,GO:0005794~Golgi apparatus,GO:0010008~endosome membrane,GO:0016020~membrane,GO:0030136~clathrin-coated vesicle,GO:0031410~cytoplasmic vesicle,GO:0048471~perinuclear region of cytoplasm,
Q9EQU5	SET nuclear oncogene(Set)	Mus musculus	GO:0005634~nucleus,GO:0005654~nucleoplasm,GO:0005737~cytoplasm,GO:0005783~endoplasmic reticulum,GO:0005829~cytosol,GO:0043234~protein complex,GO:0048471~perinuclear region of cytoplasm,
Q91VW3	SH3 domain binding glutamic acid-rich protein-like 3(Sh3bgrl3)	Mus musculus	GO:0005634~nucleus,GO:0005737~cytoplasm,GO:0030027~lamellipodium,GO:0070062~extracellular exosome,
Q62420	SH3-domain GRB2-like 2(Sh3gl2)	Mus musculus	GO:0005737~cytoplasm,GO:0016020~membrane,GO:0045202~synapse,GO:0070062~extracellular exosome,
Q0VGU4	VGF nerve growth factor inducible(Vgf)	Mus musculus	GO:0005576~extracellular region,GO:0005615~extracellular space,GO:0030667~secretory granule membrane,GO:0031410~cytoplasmic vesicle,GO:0043005~neuron projection,GO:0043025~neuronal cell body,GO:0043231~intracellular membrane-bounded organelle,
Q9JM76	actin related protein 2/3 complex, subunit 3(Arpc3)	Mus musculus	GO:0005737~cytoplasm,GO:0005856~cytoskeleton,GO:0005885~Arp2/3 protein complex,GO:0005925~focal adhesion,GO:0016020~membrane,GO:0030027~lamellipodium,GO:0030426~growth cone,GO:0042995~cell projection,GO:0070062~extracellular exosome,
Q8VHQ9	acyl-CoA thioesterase 11(Acot11)	Mus musculus	GO:0005737~cytoplasm,GO:0005829~cytosol,GO:0070062~extracellular exosome,
P07724	albumin(Alb)	Mus musculus	GO:0005576~extracellular region,GO:0005604~basement membrane,GO:0005615~extracellular space,GO:0005634~nucleus,GO:0005737~cytoplasm,GO:0005783~endoplasmic reticulum,GO:0005794~Golgi apparatus,GO:0043209~myelin sheath,GO:0043234~protein complex,GO:0070062~extracellular exosome,GO:0072562~blood microparticle,
P05064	aldolase A, fructose-bisphosphate(Aldoa)	Mus musculus	GO:0005615~extracellular space,GO:0005634~nucleus,GO:0005720~nuclear heterochromatin,GO:0005737~cytoplasm,GO:0005739~mitochondrion,GO:0005913~cell-cell adherens junction,GO:0015629~actin cytoskeleton,GO:0016020~membrane,GO:0016021~integral component of membrane,GO:0030018~Z disc,GO:0031430~M band,GO:0035686~sperm fibrous sheath,GO:0043209~myelin sheath,GO:0043234~protein complex,GO:0070062~extrac…
Q9CQC6	basic leucine zipper and W2 domains 1(Bzw1)	Mus musculus	GO:0005737~cytoplasm,GO:0005913~cell-cell adherens junction,GO:0016020~membrane,
Q61361	brevican(Bcan)	Mus musculus	GO:0005576~extracellular region,GO:0005578~proteinaceous extracellular matrix,GO:0005615~extracellular space,GO:0030425~dendrite,GO:0031225~anchored component of membrane,GO:0045202~synapse,
O88456	calpain, small subunit 1(Capns1)	Mus musculus	GO:0005737~cytoplasm,GO:0005829~cytosol,GO:0005886~plasma membrane,GO:0016020~membrane,GO:0070062~extracellular exosome,
Q4VAA2	carnitine deficiency-associated gene expressed in ventricle 3(Cdv3)	Mus musculus	GO:0005634~nucleus,GO:0005730~nucleolus,GO:0005737~cytoplasm,GO:0005886~plasma membrane,
P06797	cathepsin L(Ctsl)	Mus musculus	GO:0005615~extracellular space,GO:0005634~nucleus,GO:0005730~nucleolus,GO:0005737~cytoplasm,GO:0005764~lysosome,GO:0005773~vacuole,GO:0005902~microvillus,GO:0009897~external side of plasma membrane,GO:0030141~secretory granule,GO:0031410~cytoplasmic vesicle,GO:0043005~neuron projection,GO:0043204~perikaryon,GO:0045177~apical part of cell,GO:0070062~extracellular exosome,
Q9R171	cerebellin 1 precursor protein(Cbln1)	Mus musculus	GO:0005576~extracellular region,GO:0005886~plasma membrane,GO:0016020~membrane,GO:0030054~cell junction,GO:0045202~synapse,GO:0045211~postsynaptic membrane,
Q8BME9	cerebellin 4 precursor protein(Cbln4)	Mus musculus	GO:0005576~extracellular region,GO:0005615~extracellular space,GO:0030054~cell junction,GO:0045202~synapse,
P80317	chaperonin containing Tcp1, subunit 6a (zeta)(Cct6a)	Mus musculus	GO:0001669~acrosomal vesicle,GO:0002199~zona pellucida receptor complex,GO:0005737~cytoplasm,GO:0005832~chaperonin-containing T-complex,GO:0005874~microtubule,GO:0031012~extracellular matrix,GO:0044297~cell body,GO:0070062~extracellular exosome,
P09240	cholecystokinin(Cck)	Mus musculus	GO:0005576~extracellular region,GO:0005615~extracellular space,GO:0030424~axon,GO:0030425~dendrite,GO:0043025~neuronal cell body,GO:0043194~axon initial segment,GO:0043195~terminal bouton,GO:0043203~axon hillock,GO:0043204~perikaryon,
P26339	chromogranin A(Chga)	Mus musculus	GO:0005576~extracellular region,GO:0005615~extracellular space,GO:0016020~membrane,GO:0030141~secretory granule,GO:0030658~transport vesicle membrane,GO:0031410~cytoplasmic vesicle,GO:0042583~chromaffin granule,GO:0042629~mast cell granule,GO:0048471~perinuclear region of cytoplasm,
P16014	chromogranin B(Chgb)	Mus musculus	GO:0005576~extracellular region,GO:0030141~secretory granule,
P18760	cofilin 1, non-muscle(Cfl1)	Mus musculus	GO:0005576~extracellular region,GO:0005615~extracellular space,GO:0005622~intracellular,GO:0005634~nucleus,GO:0005737~cytoplasm,GO:0005829~cytosol,GO:0005856~cytoskeleton,GO:0005886~plasma membrane,GO:0005911~cell-cell junction,GO:0005925~focal adhesion,GO:0015629~actin cytoskeleton,GO:0016020~membrane,GO:0016363~nuclear matrix,GO:0030027~lamellipodium,GO:0030864~cortical actin cytoskeleton,GO:00…
O35658	complement component 1, q subcomponent binding protein(C1qbp)	Mus musculus	GO:0005576~extracellular region,GO:0005615~extracellular space,GO:0005634~nucleus,GO:0005730~nucleolus,GO:0005737~cytoplasm,GO:0005739~mitochondrion,GO:0005759~mitochondrial matrix,GO:0005829~cytosol,GO:0005886~plasma membrane,GO:0009986~cell surface,GO:0016020~membrane,
P63040	complexin 1(Cplx1)	Mus musculus	GO:0005737~cytoplasm,GO:0005829~cytosol,GO:0030425~dendrite,GO:0031201~SNARE complex,GO:0043025~neuronal cell body,GO:0043195~terminal bouton,GO:0043234~protein complex,GO:0045202~synapse,GO:0070032~synaptobrevin 2-SNAP-25-syntaxin-1a-complexin I complex,
Q04447	creatine kinase, brain(Ckb)	Mus musculus	GO:0005737~cytoplasm,GO:0005739~mitochondrion,GO:0043209~myelin sheath,GO:0070062~extracellular exosome,
P23927	crystallin, alpha B(Cryab)	Mus musculus	GO:0005634~nucleus,GO:0005737~cytoplasm,GO:0005739~mitochondrion,GO:0005794~Golgi apparatus,GO:0005829~cytosol,GO:0005886~plasma membrane,GO:0009986~cell surface,GO:0014069~postsynaptic density,GO:0015630~microtubule cytoskeleton,GO:0030018~Z disc,GO:0030424~axon,GO:0031430~M band,GO:0031674~I band,GO:0032432~actin filament bundle,GO:0043197~dendritic spine,GO:0043204~perikaryon,GO:0043209~myelin…
Q9DCT8	cysteine rich protein 2(Crip2)	Mus musculus	GO:0005938~cell cortex,GO:0031012~extracellular matrix,
P56393	cytochrome c oxidase subunit VIIb(Cox7b)	Mus musculus	GO:0005739~mitochondrion,GO:0005743~mitochondrial inner membrane,GO:0005746~mitochondrial respiratory chain,GO:0016020~membrane,GO:0016021~integral component of membrane,GO:0045277~respiratory chain complex IV,
P43024	cytochrome c oxidase subunit VIa polypeptide 1(Cox6a1)	Mus musculus	GO:0005739~mitochondrion,GO:0005743~mitochondrial inner membrane,GO:0005751~mitochondrial respiratory chain complex IV,GO:0016020~membrane,GO:0016021~integral component of membrane,GO:0043209~myelin sheath,
P12787	cytochrome c oxidase subunit Va(Cox5a)	Mus musculus	GO:0005739~mitochondrion,GO:0005743~mitochondrial inner membrane,GO:0005751~mitochondrial respiratory chain complex IV,GO:0016020~membrane,GO:0043209~myelin sheath,GO:0070062~extracellular exosome,
P56391	cytochrome c oxidase, subunit VIb polypeptide 1(Cox6b1)	Mus musculus	GO:0005739~mitochondrion,GO:0005743~mitochondrial inner membrane,GO:0005758~mitochondrial intermembrane space,
P62897	cytochrome c, somatic(Cycs)	Mus musculus	GO:0005634~nucleus,GO:0005739~mitochondrion,GO:0005758~mitochondrial intermembrane space,GO:0005829~cytosol,GO:0043209~myelin sheath,GO:0070469~respiratory chain,
P31786	diazepam binding inhibitor(Dbi)	Mus musculus	GO:0005615~extracellular space,GO:0005634~nucleus,GO:0005737~cytoplasm,GO:0005739~mitochondrion,GO:0005783~endoplasmic reticulum,GO:0005794~Golgi apparatus,GO:0005886~plasma membrane,GO:0008021~synaptic vesicle,GO:0043292~contractile fiber,GO:0070062~extracellular exosome,
O08553	dihydropyrimidinase-like 2(Dpysl2)	Mus musculus	GO:0005737~cytoplasm,GO:0005739~mitochondrion,GO:0005829~cytosol,GO:0005856~cytoskeleton,GO:0005874~microtubule,GO:0016020~membrane,GO:0030424~axon,GO:0030425~dendrite,GO:0030426~growth cone,GO:0043005~neuron projection,GO:0043025~neuronal cell body,GO:0043195~terminal bouton,GO:0043209~myelin sheath,GO:0043234~protein complex,GO:0070062~extracellular exosome,
Q9CWS0	dimethylarginine dimethylaminohydrolase 1(Ddah1)	Mus musculus	GO:0005739~mitochondrion,GO:0070062~extracellular exosome,
Q62418	drebrin-like(Dbnl)	Mus musculus	GO:0000139~Golgi membrane,GO:0001726~ruffle,GO:0002102~podosome,GO:0005622~intracellular,GO:0005737~cytoplasm,GO:0005768~endosome,GO:0005769~early endosome,GO:0005794~Golgi apparatus,GO:0005829~cytosol,GO:0005856~cytoskeleton,GO:0005886~plasma membrane,GO:0005913~cell-cell adherens junction,GO:0005938~cell cortex,GO:0014069~postsynaptic density,GO:0016020~membrane,GO:0030027~lamellipodium,GO:0030…
P39053	dynamin 1(Dnm1)	Mus musculus	GO:0001917~photoreceptor inner segment,GO:0005737~cytoplasm,GO:0005794~Golgi apparatus,GO:0005856~cytoskeleton,GO:0005874~microtubule,GO:0005886~plasma membrane,GO:0008021~synaptic vesicle,GO:0030117~membrane coat,GO:0031966~mitochondrial membrane,GO:0043196~varicosity,GO:0043209~myelin sheath,GO:0043234~protein complex,GO:0045202~synapse,GO:0070062~extracellular exosome,
P17183	enolase 2, gamma neuronal(Eno2)	Mus musculus	GO:0000015~phosphopyruvate hydratase complex,GO:0001917~photoreceptor inner segment,GO:0005615~extracellular space,GO:0005622~intracellular,GO:0005737~cytoplasm,GO:0005886~plasma membrane,GO:0016020~membrane,GO:0043005~neuron projection,GO:0043025~neuronal cell body,GO:0043204~perikaryon,GO:0043209~myelin sheath,GO:0070062~extracellular exosome,GO:0097060~synaptic membrane,
Q8BGD9	eukaryotic translation initiation factor 4B(Eif4b)	Mus musculus	GO:0005844~polysome,GO:0016281~eukaryotic translation initiation factor 4F complex,GO:0030425~dendrite,GO:0043025~neuronal cell body,
P70445	eukaryotic translation initiation factor 4E binding protein 2(Eif4ebp2)	Mus musculus	GO:0005737~cytoplasm,
Q9WUK2	eukaryotic translation initiation factor 4H(Eif4h)	Mus musculus	GO:0005737~cytoplasm,GO:0005844~polysome,GO:0005913~cell-cell adherens junction,GO:0016020~membrane,GO:0016281~eukaryotic translation initiation factor 4F complex,GO:0048471~perinuclear region of cytoplasm,
P06745	glucose phosphate isomerase 1(Gpi1)	Mus musculus	GO:0005576~extracellular region,GO:0005615~extracellular space,GO:0005654~nucleoplasm,GO:0005737~cytoplasm,GO:0005829~cytosol,GO:0005886~plasma membrane,GO:0016020~membrane,GO:0043005~neuron projection,GO:0043209~myelin sheath,GO:0060170~ciliary membrane,GO:0070062~extracellular exosome,
P70699	glucosidase, alpha, acid(Gaa)	Mus musculus	GO:0005764~lysosome,GO:0005765~lysosomal membrane,GO:0016020~membrane,GO:0016021~integral component of membrane,GO:0070062~extracellular exosome,
P16858	glyceraldehyde-3-phosphate dehydrogenase(Gapdh)	Mus musculus	GO:0005634~nucleus,GO:0005737~cytoplasm,GO:0005739~mitochondrion,GO:0005811~lipid particle,GO:0005829~cytosol,GO:0005886~plasma membrane,GO:0015630~microtubule cytoskeleton,GO:0016020~membrane,GO:0030529~intracellular ribonucleoprotein complex,GO:0031012~extracellular matrix,GO:0031965~nuclear membrane,GO:0031982~vesicle,GO:0043209~myelin sheath,GO:0043231~intracellular membrane-bounded organelle…
P63213	guanine nucleotide binding protein (G protein), gamma 2(Gng2)	Mus musculus	GO:0005834~heterotrimeric G-protein complex,GO:0005886~plasma membrane,GO:0016020~membrane,GO:0070062~extracellular exosome,
Q61016	guanine nucleotide binding protein (G protein), gamma 7(Gng7)	Mus musculus	GO:0005834~heterotrimeric G-protein complex,GO:0005886~plasma membrane,GO:0016020~membrane,GO:0070062~extracellular exosome,
Q64433	heat shock protein 1 (chaperonin 10)(Hspe1)	Mus musculus	GO:0005737~cytoplasm,GO:0005739~mitochondrion,GO:0005759~mitochondrial matrix,GO:0016020~membrane,GO:0070062~extracellular exosome,
P01942	hemoglobin alpha, adult chain 1(Hba-a1)	Mus musculus	GO:0005833~hemoglobin complex,GO:0016020~membrane,GO:0022627~cytosolic small ribosomal subunit,GO:0031838~haptoglobin-hemoglobin complex,GO:0043209~myelin sheath,GO:0070062~extracellular exosome,GO:0072562~blood microparticle,
P02088	hemoglobin, beta adult major chain(Hbb-b1)	Mus musculus	GO:0005833~hemoglobin complex,GO:0043209~myelin sheath,
Q6ZWY9	histone cluster 1, H2bc(Hist1h2bc)	Mus musculus	GO:0000788~nuclear nucleosome,GO:0005615~extracellular space,GO:0005634~nucleus,GO:0005654~nucleoplasm,GO:0005737~cytoplasm,GO:0070062~extracellular exosome,
P34884	macrophage migration inhibitory factor(Mif)	Mus musculus	GO:0005576~extracellular region,GO:0005615~extracellular space,GO:0005634~nucleus,GO:0005654~nucleoplasm,GO:0005737~cytoplasm,GO:0009986~cell surface,GO:0031982~vesicle,GO:0043209~myelin sheath,GO:0070062~extracellular exosome,
P08249	malate dehydrogenase 2, NAD (mitochondrial)(Mdh2)	Mus musculus	GO:0005634~nucleus,GO:0005654~nucleoplasm,GO:0005739~mitochondrion,GO:0005743~mitochondrial inner membrane,GO:0005759~mitochondrial matrix,GO:0005886~plasma membrane,GO:0016020~membrane,GO:0043209~myelin sheath,GO:0070062~extracellular exosome,
P20357	microtubule-associated protein 2(Map2)	Mus musculus	GO:0005622~intracellular,GO:0005730~nucleolus,GO:0005737~cytoplasm,GO:0005790~smooth endoplasmic reticulum,GO:0005791~rough endoplasmic reticulum,GO:0005856~cytoskeleton,GO:0005874~microtubule,GO:0005875~microtubule associated complex,GO:0014069~postsynaptic density,GO:0030425~dendrite,GO:0034399~nuclear periphery,GO:0043005~neuron projection,GO:0043025~neuronal cell body,GO:0043198~dendritic sha…
Q7TSJ2	microtubule-associated protein 6(Map6)	Mus musculus	GO:0005737~cytoplasm,GO:0005794~Golgi apparatus,GO:0005856~cytoskeleton,GO:0005874~microtubule,GO:0048471~perinuclear region of cytoplasm,
P10637	microtubule-associated protein tau(Mapt)	Mus musculus	GO:0005634~nucleus,GO:0005737~cytoplasm,GO:0005829~cytosol,GO:0005856~cytoskeleton,GO:0005874~microtubule,GO:0005875~microtubule associated complex,GO:0005886~plasma membrane,GO:0005930~axoneme,GO:0014069~postsynaptic density,GO:0015630~microtubule cytoskeleton,GO:0016020~membrane,GO:0030424~axon,GO:0030425~dendrite,GO:0030426~growth cone,GO:0034399~nuclear periphery,GO:0036464~cytoplasmic ribonu…
P04370	myelin basic protein(Mbp)	Mus musculus	GO:0005634~nucleus,GO:0005737~cytoplasm,GO:0005886~plasma membrane,GO:0016020~membrane,GO:0033269~internode region of axon,GO:0042995~cell projection,GO:0043025~neuronal cell body,GO:0043209~myelin sheath,GO:0043218~compact myelin,GO:0071944~cell periphery,
P20917	myelin-associated glycoprotein(Mag)	Mus musculus	GO:0005737~cytoplasm,GO:0005886~plasma membrane,GO:0016020~membrane,GO:0016021~integral component of membrane,GO:0033270~paranode region of axon,GO:0035749~myelin sheath adaxonal region,GO:0043209~myelin sheath,GO:0043220~Schmidt-Lanterman incisure,GO:0097453~mesaxon,
Q9CQ19	myosin, light polypeptide 9, regulatory(Myl9)	Mus musculus	GO:0001725~stress fiber,GO:0016459~myosin complex,GO:0016460~myosin II complex,GO:0030018~Z disc,
P62774	myotrophin(Mtpn)	Mus musculus	GO:0005634~nucleus,GO:0005737~cytoplasm,GO:0005829~cytosol,GO:0008290~F-actin capping protein complex,GO:0030424~axon,GO:0048471~perinuclear region of cytoplasm,GO:0070062~extracellular exosome,
Q9DC07	nebulette(Nebl)	Mus musculus	GO:0001725~stress fiber,GO:0005737~cytoplasm,GO:0030018~Z disc,
P08551	neurofilament, light polypeptide(Nefl)	Mus musculus	GO:0005737~cytoplasm,GO:0005882~intermediate filament,GO:0005883~neurofilament,GO:0030424~axon,GO:0030426~growth cone,GO:0033596~TSC1-TSC2 complex,GO:0043005~neuron projection,GO:0043209~myelin sheath,GO:1904115~axon cytoplasm,
P60761	neurogranin(Nrgn)	Mus musculus	GO:0005634~nucleus,GO:0005737~cytoplasm,GO:0012510~trans-Golgi network transport vesicle membrane,GO:0014069~postsynaptic density,GO:0030054~cell junction,GO:0030424~axon,GO:0030425~dendrite,GO:0031966~mitochondrial membrane,GO:0042995~cell projection,GO:0043025~neuronal cell body,GO:0044327~dendritic spine head,GO:0045202~synapse,
P17742	peptidylprolyl isomerase A(Ppia)	Mus musculus	GO:0005576~extracellular region,GO:0005615~extracellular space,GO:0005634~nucleus,GO:0005737~cytoplasm,GO:0005829~cytosol,GO:0005925~focal adhesion,GO:0016020~membrane,GO:0043209~myelin sheath,GO:0070062~extracellular exosome,
P99029	peroxiredoxin 5(Prdx5)	Mus musculus	GO:0005615~extracellular space,GO:0005623~cell,GO:0005634~nucleus,GO:0005737~cytoplasm,GO:0005739~mitochondrion,GO:0005777~peroxisome,GO:0005782~peroxisomal matrix,GO:0005829~cytosol,GO:0031410~cytoplasmic vesicle,GO:0043231~intracellular membrane-bounded organelle,GO:0048471~perinuclear region of cytoplasm,GO:0070062~extracellular exosome,
O08709	peroxiredoxin 6(Prdx6)	Mus musculus	GO:0005615~extracellular space,GO:0005623~cell,GO:0005737~cytoplasm,GO:0005739~mitochondrion,GO:0005764~lysosome,GO:0005829~cytosol,GO:0005913~cell-cell adherens junction,GO:0016020~membrane,GO:0016023~cytoplasmic, membrane-bounded vesicle,GO:0031410~cytoplasmic vesicle,GO:0070062~extracellular exosome,
P70296	phosphatidylethanolamine binding protein 1(Pebp1)	Mus musculus	GO:0005615~extracellular space,GO:0005634~nucleus,GO:0005737~cytoplasm,GO:0005739~mitochondrion,GO:0005741~mitochondrial outer membrane,GO:0005791~rough endoplasmic reticulum,GO:0005794~Golgi apparatus,GO:0008021~synaptic vesicle,GO:0009986~cell surface,GO:0043005~neuron projection,GO:0043025~neuronal cell body,GO:0043209~myelin sheath,GO:0043679~axon terminus,GO:0045177~apical part of cell,GO:00…
Q9QYX7	piccolo (presynaptic cytomatrix protein)(Pclo)	Mus musculus	GO:0005802~trans-Golgi network,GO:0014069~postsynaptic density,GO:0030054~cell junction,GO:0030133~transport vesicle,GO:0030424~axon,GO:0030425~dendrite,GO:0030426~growth cone,GO:0031594~neuromuscular junction,GO:0043005~neuron projection,GO:0043025~neuronal cell body,GO:0043195~terminal bouton,GO:0044316~cone cell pedicle,GO:0044317~rod spherule,GO:0045202~synapse,GO:0048471~perinuclear region o…
Q9DCU2	plasma membrane proteolipid(Pllp)	Mus musculus	GO:0016020~membrane,GO:0016021~integral component of membrane,GO:0043218~compact myelin,GO:0045121~membrane raft,GO:0070062~extracellular exosome,
Q9JM63	potassium inwardly-rectifying channel, subfamily J, member 10(Kcnj10)	Mus musculus	GO:0005886~plasma membrane,GO:0005887~integral component of plasma membrane,GO:0005902~microvillus,GO:0016020~membrane,GO:0016021~integral component of membrane,GO:0016323~basolateral plasma membrane,GO:0016324~apical plasma membrane,GO:0097449~astrocyte projection,GO:0098793~presynapse,
Q08460	potassium large conductance calcium-activated channel, subfamily M, alpha member 1(Kcnma1)	Mus musculus	GO:0005737~cytoplasm,GO:0005739~mitochondrion,GO:0005783~endoplasmic reticulum,GO:0005886~plasma membrane,GO:0005901~caveola,GO:0008076~voltage-gated potassium channel complex,GO:0009897~external side of plasma membrane,GO:0016020~membrane,GO:0016021~integral component of membrane,GO:0016324~apical plasma membrane,GO:0019028~viral capsid,GO:0019031~viral envelope,GO:0030425~dendrite,GO:0043025~ne…
Q9CWM4	prefoldin 1(Pfdn1)	Mus musculus	GO:0016272~prefoldin complex,
Q64387	prepronociceptin(Pnoc)	Mus musculus	GO:0005576~extracellular region,GO:0005886~plasma membrane,GO:0030425~dendrite,GO:0043025~neuronal cell body,GO:0043679~axon terminus,
Q6PE13	proline-rich transmembrane protein 3(Prrt3)	Mus musculus	GO:0016020~membrane,GO:0016021~integral component of membrane,
Q9QXV0	proprotein convertase subtilisin/kexin type 1 inhibitor(Pcsk1n)	Mus musculus	GO:0005576~extracellular region,GO:0005615~extracellular space,GO:0005794~Golgi apparatus,GO:0005802~trans-Golgi network,GO:0030141~secretory granule,GO:0070062~extracellular exosome,
P21661	proprotein convertase subtilisin/kexin type 2(Pcsk2)	Mus musculus	GO:0005615~extracellular space,GO:0005788~endoplasmic reticulum lumen,GO:0016020~membrane,GO:0016021~integral component of membrane,GO:0030133~transport vesicle,GO:0030141~secretory granule,GO:0030425~dendrite,GO:0031410~cytoplasmic vesicle,GO:0043025~neuronal cell body,GO:0043204~perikaryon,
Q60692	proteasome (prosome, macropain) subunit, beta type 6(Psmb6)	Mus musculus	GO:0000502~proteasome complex,GO:0005634~nucleus,GO:0005654~nucleoplasm,GO:0005737~cytoplasm,GO:0005794~Golgi apparatus,GO:0005829~cytosol,GO:0005839~proteasome core complex,GO:0005913~cell-cell adherens junction,GO:0070062~extracellular exosome,
Q61644	protein kinase C and casein kinase substrate in neurons 1(Pacsin1)	Mus musculus	GO:0005737~cytoplasm,GO:0005768~endosome,GO:0005802~trans-Golgi network,GO:0005829~cytosol,GO:0005886~plasma membrane,GO:0016020~membrane,GO:0030054~cell junction,GO:0030137~COPI-coated vesicle,GO:0030659~cytoplasmic vesicle membrane,GO:0031410~cytoplasmic vesicle,GO:0032587~ruffle membrane,GO:0042995~cell projection,GO:0043005~neuron projection,GO:0043195~terminal bouton,GO:0043209~myelin sheath…
P14869	ribosomal protein, large, P0(Rplp0)	Mus musculus	GO:0005622~intracellular,GO:0005634~nucleus,GO:0005737~cytoplasm,GO:0005840~ribosome,GO:0005925~focal adhesion,GO:0016020~membrane,GO:0022625~cytosolic large ribosomal subunit,GO:0030425~dendrite,GO:0030529~intracellular ribonucleoprotein complex,GO:0030687~preribosome, large subunit precursor,GO:0036464~cytoplasmic ribonucleoprotein granule,GO:0070062~extracellular exosome,
Q9CZC8	secernin 1(Scrn1)	Mus musculus	GO:0005634~nucleus,GO:0005737~cytoplasm,GO:0031965~nuclear membrane,
Q8K021	secretory carrier membrane protein 1(Scamp1)	Mus musculus	GO:0005654~nucleoplasm,GO:0005768~endosome,GO:0005794~Golgi apparatus,GO:0005802~trans-Golgi network,GO:0008021~synaptic vesicle,GO:0016020~membrane,GO:0016021~integral component of membrane,GO:0030054~cell junction,GO:0030136~clathrin-coated vesicle,GO:0030672~synaptic vesicle membrane,GO:0042589~zymogen granule membrane,GO:0043195~terminal bouton,GO:0043231~intracellular membrane-bounded organe…
P97797	signal-regulatory protein alpha(Sirpa)	Mus musculus	GO:0005886~plasma membrane,GO:0005887~integral component of plasma membrane,GO:0016020~membrane,GO:0016021~integral component of membrane,GO:0070062~extracellular exosome,
Q8BLE7	solute carrier family 17 (sodium-dependent inorganic phosphate cotransporter), member 6(Slc17a6)	Mus musculus	GO:0005769~early endosome,GO:0008021~synaptic vesicle,GO:0016020~membrane,GO:0016021~integral component of membrane,GO:0030054~cell junction,GO:0030672~synaptic vesicle membrane,GO:0031410~cytoplasmic vesicle,GO:0043005~neuron projection,GO:0045202~synapse,GO:0060076~excitatory synapse,GO:1990030~pericellular basket,
Q9D6M3	solute carrier family 25 (mitochondrial carrier, glutamate), member 22(Slc25a22)	Mus musculus	GO:0005654~nucleoplasm,GO:0005739~mitochondrion,GO:0005743~mitochondrial inner membrane,GO:0016020~membrane,GO:0016021~integral component of membrane,
Q60738	solute carrier family 30 (zinc transporter), member 1(Slc30a1)	Mus musculus	GO:0005737~cytoplasm,GO:0005783~endoplasmic reticulum,GO:0005794~Golgi apparatus,GO:0005886~plasma membrane,GO:0016020~membrane,GO:0016021~integral component of membrane,GO:0030315~T-tubule,GO:0031965~nuclear membrane,
P97441	solute carrier family 30 (zinc transporter), member 3(Slc30a3)	Mus musculus	GO:0005737~cytoplasm,GO:0005764~lysosome,GO:0005765~lysosomal membrane,GO:0005768~endosome,GO:0005770~late endosome,GO:0005886~plasma membrane,GO:0016020~membrane,GO:0016021~integral component of membrane,GO:0030054~cell junction,GO:0030672~synaptic vesicle membrane,GO:0031410~cytoplasmic vesicle,GO:0031902~late endosome membrane,GO:0043005~neuron projection,GO:0045202~synapse,
Q9WTR6	solute carrier family 7 (cationic amino acid transporter, y+ system), member 11(Slc7a11)	Mus musculus	GO:0005791~rough endoplasmic reticulum,GO:0005856~cytoskeleton,GO:0005886~plasma membrane,GO:0005887~integral component of plasma membrane,GO:0009986~cell surface,GO:0016020~membrane,GO:0016021~integral component of membrane,GO:0043231~intracellular membrane-bounded organelle,
O88935	synapsin I(Syn1)	Mus musculus	GO:0000795~synaptonemal complex,GO:0005794~Golgi apparatus,GO:0005829~cytosol,GO:0008021~synaptic vesicle,GO:0014069~postsynaptic density,GO:0030054~cell junction,GO:0030424~axon,GO:0030425~dendrite,GO:0030672~synaptic vesicle membrane,GO:0043195~terminal bouton,GO:0043209~myelin sheath,GO:0043229~intracellular organelle,GO:0045202~synapse,GO:0048786~presynaptic active zone,
Q64332	synapsin II(Syn2)	Mus musculus	GO:0005886~plasma membrane,GO:0008021~synaptic vesicle,GO:0014069~postsynaptic density,GO:0030054~cell junction,GO:0030672~synaptic vesicle membrane,GO:0031201~SNARE complex,GO:0043195~terminal bouton,GO:0043209~myelin sheath,GO:0045202~synapse,
P60879	synaptosomal-associated protein 25(Snap25)	Mus musculus	GO:0005737~cytoplasm,GO:0005768~endosome,GO:0005802~trans-Golgi network,GO:0005829~cytosol,GO:0005886~plasma membrane,GO:0008021~synaptic vesicle,GO:0008076~voltage-gated potassium channel complex,GO:0015629~actin cytoskeleton,GO:0016020~membrane,GO:0030027~lamellipodium,GO:0030054~cell junction,GO:0030175~filopodium,GO:0030424~axon,GO:0030426~growth cone,GO:0031083~BLOC-1 complex,GO:0031201~SNAR…
Q61548	synaptosomal-associated protein 91(Snap91)	Mus musculus	GO:0005886~plasma membrane,GO:0005905~clathrin-coated pit,GO:0008021~synaptic vesicle,GO:0014069~postsynaptic density,GO:0016020~membrane,GO:0030122~AP-2 adaptor complex,GO:0030136~clathrin-coated vesicle,GO:0042734~presynaptic membrane,GO:0043195~terminal bouton,GO:0045211~postsynaptic membrane,GO:0098793~presynapse,
Q9ER00	syntaxin 12(Stx12)	Mus musculus	GO:0000139~Golgi membrane,GO:0000407~pre-autophagosomal structure,GO:0005622~intracellular,GO:0005768~endosome,GO:0005794~Golgi apparatus,GO:0010008~endosome membrane,GO:0012505~endomembrane system,GO:0016020~membrane,GO:0016021~integral component of membrane,GO:0031083~BLOC-1 complex,GO:0031201~SNARE complex,GO:0031982~vesicle,GO:0045121~membrane raft,GO:0045335~phagocytic vesicle,GO:0070062~ext…
O55042	synuclein, alpha(Snca)	Mus musculus	GO:0005576~extracellular region,GO:0005615~extracellular space,GO:0005634~nucleus,GO:0005640~nuclear outer membrane,GO:0005737~cytoplasm,GO:0005739~mitochondrion,GO:0005791~rough endoplasmic reticulum,GO:0005794~Golgi apparatus,GO:0005829~cytosol,GO:0005840~ribosome,GO:0005856~cytoskeleton,GO:0005886~plasma membrane,GO:0005938~cell cortex,GO:0008021~synaptic vesicle,GO:0015629~actin cytoskeleton,…
Q91ZZ3	synuclein, beta(Sncb)	Mus musculus	GO:0005654~nucleoplasm,GO:0005737~cytoplasm,GO:0005739~mitochondrion,GO:0005794~Golgi apparatus,GO:0016234~inclusion body,GO:0030426~growth cone,GO:0043025~neuronal cell body,GO:0043195~terminal bouton,GO:0043679~axon terminus,GO:0045202~synapse,
Q6ZWY8	thymosin, beta 10(Tmsb10)	Mus musculus	GO:0005623~cell,GO:0005737~cytoplasm,GO:0031941~filamentous actin,
P62073	translocase of inner mitochondrial membrane 10(Timm10)	Mus musculus	GO:0005739~mitochondrion,GO:0005743~mitochondrial inner membrane,GO:0016020~membrane,GO:0042719~mitochondrial intermembrane space protein transporter complex,
P17751	triosephosphate isomerase 1(Tpi1)	Mus musculus	GO:0005615~extracellular space,GO:0005634~nucleus,GO:0005829~cytosol,GO:0070062~extracellular exosome,
Q7TQD2	tubulin polymerization promoting protein(Tppp)	Mus musculus	GO:0005634~nucleus,GO:0005737~cytoplasm,GO:0005856~cytoskeleton,GO:0005874~microtubule,GO:0043209~myelin sheath,GO:0048471~perinuclear region of cytoplasm,
P68369	tubulin, alpha 1A(Tuba1a)	Mus musculus	GO:0005634~nucleus,GO:0005737~cytoplasm,GO:0005856~cytoskeleton,GO:0005874~microtubule,GO:0005881~cytoplasmic microtubule,GO:0036464~cytoplasmic ribonucleoprotein granule,GO:0043209~myelin sheath,GO:0055037~recycling endosome,GO:0070062~extracellular exosome,
Q7TMM9	tubulin, beta 2A class IIA(Tubb2a)	Mus musculus	GO:0005634~nucleus,GO:0005737~cytoplasm,GO:0005856~cytoskeleton,GO:0005874~microtubule,GO:0070062~extracellular exosome,GO:1903561~extracellular vesicle,
P68372	tubulin, beta 4B class IVB(Tubb4b)	Mus musculus	GO:0005634~nucleus,GO:0005737~cytoplasm,GO:0005856~cytoskeleton,GO:0005874~microtubule,GO:0031012~extracellular matrix,GO:0043209~myelin sheath,GO:0045298~tubulin complex,GO:0070062~extracellular exosome,GO:1903561~extracellular vesicle,
P63028	tumor protein, translationally-controlled 1(Tpt1)	Mus musculus	GO:0005615~extracellular space,GO:0005634~nucleus,GO:0005654~nucleoplasm,GO:0005737~cytoplasm,GO:0005771~multivesicular body,GO:0045298~tubulin complex,GO:0070062~extracellular exosome,
Q9D3A9	tweety family member 1(Ttyh1)	Mus musculus	GO:0005886~plasma membrane,GO:0016020~membrane,GO:0016021~integral component of membrane,GO:0030424~axon,GO:0030868~smooth endoplasmic reticulum membrane,GO:0031527~filopodium membrane,GO:0032433~filopodium tip,GO:0034707~chloride channel complex,
Q6P5F7	tweety family member 3(Ttyh3)	Mus musculus	GO:0005886~plasma membrane,GO:0016020~membrane,GO:0016021~integral component of membrane,GO:0034707~chloride channel complex,GO:0070062~extracellular exosome,
Q9CQV8	tyrosine 3-monooxygenase/tryptophan 5-monooxygenase activation protein, beta polypeptide(Ywhab)	Mus musculus	GO:0005634~nucleus,GO:0005737~cytoplasm,GO:0005829~cytosol,GO:0005913~cell-cell adherens junction,GO:0005925~focal adhesion,GO:0016020~membrane,GO:0017053~transcriptional repressor complex,GO:0030659~cytoplasmic vesicle membrane,GO:0042470~melanosome,GO:0043234~protein complex,GO:0048471~perinuclear region of cytoplasm,GO:0070062~extracellular exosome,
P61982	tyrosine 3-monooxygenase/tryptophan 5-monooxygenase activation protein, gamma polypeptide(Ywhag)	Mus musculus	GO:0005737~cytoplasm,GO:0005829~cytosol,GO:0005925~focal adhesion,GO:0016020~membrane,GO:0030659~cytoplasmic vesicle membrane,GO:0031982~vesicle,GO:0043209~myelin sheath,GO:0070062~extracellular exosome,
Q9DB77	ubiquinol cytochrome c reductase core protein 2(Uqcrc2)	Mus musculus	GO:0005654~nucleoplasm,GO:0005739~mitochondrion,GO:0005743~mitochondrial inner membrane,GO:0005750~mitochondrial respiratory chain complex III,GO:0016020~membrane,GO:0043209~myelin sheath,GO:0070062~extracellular exosome,GO:0070469~respiratory chain,
Q9D855	ubiquinol-cytochrome c reductase binding protein(Uqcrb)	Mus musculus	GO:0005739~mitochondrion,GO:0005743~mitochondrial inner membrane,GO:0005750~mitochondrial respiratory chain complex III,GO:0016020~membrane,GO:0070469~respiratory chain,
P61089	ubiquitin-conjugating enzyme E2N(Ube2n)	Mus musculus	GO:0000151~ubiquitin ligase complex,GO:0005634~nucleus,GO:0005730~nucleolus,GO:0005737~cytoplasm,GO:0031372~UBC13-MMS2 complex,GO:0035370~UBC13-UEV1A complex,GO:0043234~protein complex,GO:0070062~extracellular exosome,
Q60932	voltage-dependent anion channel 1(Vdac1)	Mus musculus	GO:0005634~nucleus,GO:0005739~mitochondrion,GO:0005741~mitochondrial outer membrane,GO:0005743~mitochondrial inner membrane,GO:0005886~plasma membrane,GO:0008021~synaptic vesicle,GO:0016020~membrane,GO:0016021~integral component of membrane,GO:0042645~mitochondrial nucleoid,GO:0043209~myelin sheath,GO:0043234~protein complex,GO:0045121~membrane raft,GO:0046930~pore complex,GO:0070062~extracellula…

## Sheet: MF
ID	Gene Name	Species	GOTERM_MF_DIRECT
P56480	ATP synthase, H+ transporting mitochondrial F1 complex, beta subunit(Atp5b)	Mus musculus	GO:0000166~nucleotide binding,GO:0005509~calcium ion binding,GO:0005515~protein binding,GO:0005524~ATP binding,GO:0016787~hydrolase activity,GO:0016887~ATPase activity,GO:0030228~lipoprotein particle receptor activity,GO:0042288~MHC class I protein binding,GO:0046933~proton-transporting ATP synthase activity, rotational mechanism,GO:0046961~proton-transporting ATPase activity, rotational mechanis…
Q9DCX2	ATP synthase, H+ transporting, mitochondrial F0 complex, subunit D(Atp5h)	Mus musculus	GO:0015078~hydrogen ion transmembrane transporter activity,GO:0016887~ATPase activity,GO:0046933~proton-transporting ATP synthase activity, rotational mechanism,
P97450	ATP synthase, H+ transporting, mitochondrial F0 complex, subunit F(Atp5j)	Mus musculus	GO:0015078~hydrogen ion transmembrane transporter activity,GO:0016887~ATPase activity,
Q9D3D9	ATP synthase, H+ transporting, mitochondrial F1 complex, delta subunit(Atp5d)	Mus musculus	GO:0015078~hydrogen ion transmembrane transporter activity,GO:0016887~ATPase activity,GO:0032403~protein complex binding,GO:0046933~proton-transporting ATP synthase activity, rotational mechanism,GO:0046961~proton-transporting ATPase activity, rotational mechanism,
P56382	ATP synthase, H+ transporting, mitochondrial F1 complex, epsilon subunit(Atp5e)	Mus musculus	GO:0008553~hydrogen-exporting ATPase activity, phosphorylative mechanism,GO:0016787~hydrolase activity,GO:0016887~ATPase activity,GO:0046933~proton-transporting ATP synthase activity, rotational mechanism,GO:0046961~proton-transporting ATPase activity, rotational mechanism,
Q06185	ATP synthase, H+ transporting, mitochondrial F1F0 complex, subunit E(Atp5k)	Mus musculus	GO:0015078~hydrogen ion transmembrane transporter activity,GO:0016887~ATPase activity,
Q9CR51	ATPase, H+ transporting, lysosomal V1 subunit G1(Atp6v1g1)	Mus musculus	GO:0005515~protein binding,GO:0008553~hydrogen-exporting ATPase activity, phosphorylative mechanism,GO:0016820~hydrolase activity, acting on acid anhydrides, catalyzing transmembrane movement of substances,GO:0016887~ATPase activity,GO:0051117~ATPase binding,
Q9WTT4	ATPase, H+ transporting, lysosomal V1 subunit G2(Atp6v1g2)	Mus musculus	GO:0005515~protein binding,GO:0008553~hydrogen-exporting ATPase activity, phosphorylative mechanism,GO:0016820~hydrolase activity, acting on acid anhydrides, catalyzing transmembrane movement of substances,GO:0016887~ATPase activity,
P26883	FK506 binding protein 1a(Fkbp1a)	Mus musculus	GO:0003755~peptidyl-prolyl cis-trans isomerase activity,GO:0004871~signal transducer activity,GO:0005160~transforming growth factor beta receptor binding,GO:0005515~protein binding,GO:0005528~FK506 binding,GO:0008144~drug binding,GO:0016853~isomerase activity,GO:0019899~enzyme binding,GO:0030544~Hsp70 protein binding,GO:0034713~type I transforming growth factor beta receptor binding,GO:0042803~pr…
Q61792	LIM and SH3 protein 1(Lasp1)	Mus musculus	GO:0003779~actin binding,GO:0005515~protein binding,GO:0008270~zinc ion binding,GO:0015075~ion transmembrane transporter activity,GO:0046872~metal ion binding,GO:0051015~actin filament binding,GO:0098641~cadherin binding involved in cell-cell adhesion,
A2AG50	MAP7 domain containing 2(Map7d2)	Mus musculus	GO:0005198~structural molecule activity,
Q9CWZ7	N-ethylmaleimide sensitive fusion protein attachment protein gamma(Napg)	Mus musculus	GO:0005483~soluble NSF attachment protein activity,GO:0019905~syntaxin binding,
Q9Z1P6	NADH dehydrogenase (ubiquinone) 1 alpha subcomplex, 7 (B14.5a)(Ndufa7)	Mus musculus	GO:0003735~structural constituent of ribosome,GO:0008137~NADH dehydrogenase (ubiquinone) activity,
P62827	RAN, member RAS oncogene family(Ran)	Mus musculus	GO:0000166~nucleotide binding,GO:0003924~GTPase activity,GO:0005515~protein binding,GO:0005525~GTP binding,GO:0008320~protein transmembrane transporter activity,GO:0019003~GDP binding,GO:0019904~protein domain specific binding,GO:0032403~protein complex binding,GO:0044822~poly(A) RNA binding,GO:0045505~dynein intermediate chain binding,GO:0061676~importin-alpha family protein binding,GO:0070883~p…
O89086	RNA binding motif protein 3(Rbm3)	Mus musculus	GO:0000166~nucleotide binding,GO:0003676~nucleic acid binding,GO:0003723~RNA binding,GO:0043023~ribosomal large subunit binding,GO:0044822~poly(A) RNA binding,
Q68FL4	S-adenosylhomocysteine hydrolase-like 2(Ahcyl2)	Mus musculus	GO:0004013~adenosylhomocysteinase activity,GO:0016787~hydrolase activity,GO:0051287~NAD binding,
Q8CFE4	SCY1-like 2 (S. cerevisiae)(Scyl2)	Mus musculus	GO:0004672~protein kinase activity,GO:0005102~receptor binding,GO:0005515~protein binding,GO:0005524~ATP binding,
Q9EQU5	SET nuclear oncogene(Set)	Mus musculus	GO:0003677~DNA binding,
Q91VW3	SH3 domain binding glutamic acid-rich protein-like 3(Sh3bgrl3)	Mus musculus	GO:0005096~GTPase activator activity,GO:0009055~electron carrier activity,GO:0015035~protein disulfide oxidoreductase activity,GO:0030215~semaphorin receptor binding,
Q62420	SH3-domain GRB2-like 2(Sh3gl2)	Mus musculus	GO:0005515~protein binding,GO:0008289~lipid binding,GO:0042802~identical protein binding,
Q0VGU4	VGF nerve growth factor inducible(Vgf)	Mus musculus	GO:0005184~neuropeptide hormone activity,
Q9JM76	actin related protein 2/3 complex, subunit 3(Arpc3)	Mus musculus	GO:0003779~actin binding,GO:0005200~structural constituent of cytoskeleton,GO:0051015~actin filament binding,
Q8VHQ9	acyl-CoA thioesterase 11(Acot11)	Mus musculus	GO:0008289~lipid binding,GO:0016787~hydrolase activity,GO:0047617~acyl-CoA hydrolase activity,GO:0052689~carboxylic ester hydrolase activity,
P07724	albumin(Alb)	Mus musculus	GO:0003677~DNA binding,GO:0005504~fatty acid binding,GO:0008144~drug binding,GO:0008270~zinc ion binding,GO:0008289~lipid binding,GO:0015643~toxic substance binding,GO:0019825~oxygen binding,GO:0019899~enzyme binding,GO:0030170~pyridoxal phosphate binding,GO:0042802~identical protein binding,GO:0046872~metal ion binding,GO:0051087~chaperone binding,
P05064	aldolase A, fructose-bisphosphate(Aldoa)	Mus musculus	GO:0002020~protease binding,GO:0004332~fructose-bisphosphate aldolase activity,GO:0008092~cytoskeletal protein binding,GO:0044822~poly(A) RNA binding,GO:0070061~fructose binding,GO:0098641~cadherin binding involved in cell-cell adhesion,
Q9CQC6	basic leucine zipper and W2 domains 1(Bzw1)	Mus musculus	GO:0044822~poly(A) RNA binding,GO:0098641~cadherin binding involved in cell-cell adhesion,
Q61361	brevican(Bcan)	Mus musculus	GO:0005201~extracellular matrix structural constituent,GO:0005509~calcium ion binding,GO:0005540~hyaluronic acid binding,GO:0030246~carbohydrate binding,
O88456	calpain, small subunit 1(Capns1)	Mus musculus	GO:0004198~calcium-dependent cysteine-type endopeptidase activity,GO:0005509~calcium ion binding,GO:0046872~metal ion binding,GO:0046982~protein heterodimerization activity,
P06797	cathepsin L(Ctsl)	Mus musculus	GO:0004177~aminopeptidase activity,GO:0004197~cysteine-type endopeptidase activity,GO:0005515~protein binding,GO:0008233~peptidase activity,GO:0008234~cysteine-type peptidase activity,GO:0016787~hydrolase activity,GO:0016807~cysteine-type carboxypeptidase activity,GO:0030984~kininogen binding,GO:0032403~protein complex binding,GO:0042277~peptide binding,GO:0042393~histone binding,
Q9R171	cerebellin 1 precursor protein(Cbln1)	Mus musculus	GO:0005515~protein binding,GO:0042803~protein homodimerization activity,
Q8BME9	cerebellin 4 precursor protein(Cbln4)	Mus musculus	GO:0005515~protein binding,
P80317	chaperonin containing Tcp1, subunit 6a (zeta)(Cct6a)	Mus musculus	GO:0000166~nucleotide binding,GO:0005515~protein binding,GO:0005524~ATP binding,GO:0044183~protein binding involved in protein folding,GO:0044822~poly(A) RNA binding,GO:0051082~unfolded protein binding,GO:0071987~WD40-repeat domain binding,
P09240	cholecystokinin(Cck)	Mus musculus	GO:0005179~hormone activity,GO:0005184~neuropeptide hormone activity,GO:0005515~protein binding,
P16014	chromogranin B(Chgb)	Mus musculus	GO:0005515~protein binding,
P18760	cofilin 1, non-muscle(Cfl1)	Mus musculus	GO:0003779~actin binding,GO:0051015~actin filament binding,GO:1902936~phosphatidylinositol bisphosphate binding,
O35658	complement component 1, q subcomponent binding protein(C1qbp)	Mus musculus	GO:0001849~complement component C1q binding,GO:0003714~transcription corepressor activity,GO:0003729~mRNA binding,GO:0005080~protein kinase C binding,GO:0005540~hyaluronic acid binding,GO:0008134~transcription factor binding,GO:0030984~kininogen binding,GO:0031690~adrenergic receptor binding,GO:0097177~mitochondrial ribosome binding,
P63040	complexin 1(Cplx1)	Mus musculus	GO:0000149~SNARE binding,GO:0005326~neurotransmitter transporter activity,GO:0017075~syntaxin-1 binding,GO:0019905~syntaxin binding,
Q04447	creatine kinase, brain(Ckb)	Mus musculus	GO:0000166~nucleotide binding,GO:0003824~catalytic activity,GO:0004111~creatine kinase activity,GO:0005515~protein binding,GO:0005524~ATP binding,GO:0016301~kinase activity,GO:0016740~transferase activity,GO:0016772~transferase activity, transferring phosphorus-containing groups,GO:0031625~ubiquitin protein ligase binding,
P23927	crystallin, alpha B(Cryab)	Mus musculus	GO:0005212~structural constituent of eye lens,GO:0005515~protein binding,GO:0008017~microtubule binding,GO:0008092~cytoskeletal protein binding,GO:0042802~identical protein binding,GO:0042803~protein homodimerization activity,GO:0046872~metal ion binding,GO:0051082~unfolded protein binding,
Q9DCT8	cysteine rich protein 2(Crip2)	Mus musculus	GO:0005515~protein binding,GO:0008270~zinc ion binding,GO:0046872~metal ion binding,
P56393	cytochrome c oxidase subunit VIIb(Cox7b)	Mus musculus	GO:0004129~cytochrome-c oxidase activity,
P43024	cytochrome c oxidase subunit VIa polypeptide 1(Cox6a1)	Mus musculus	GO:0004129~cytochrome-c oxidase activity,GO:0030234~enzyme regulator activity,
P12787	cytochrome c oxidase subunit Va(Cox5a)	Mus musculus	GO:0004129~cytochrome-c oxidase activity,GO:0046872~metal ion binding,
P56391	cytochrome c oxidase, subunit VIb polypeptide 1(Cox6b1)	Mus musculus	GO:0004129~cytochrome-c oxidase activity,
P62897	cytochrome c, somatic(Cycs)	Mus musculus	GO:0009055~electron carrier activity,GO:0020037~heme binding,GO:0045155~electron transporter, transferring electrons from CoQH2-cytochrome c reductase complex and cytochrome c oxidase complex activity,GO:0046872~metal ion binding,
P31786	diazepam binding inhibitor(Dbi)	Mus musculus	GO:0000062~fatty-acyl-CoA binding,GO:0008289~lipid binding,GO:0030156~benzodiazepine receptor binding,GO:0036042~long-chain fatty acyl-CoA binding,GO:0046983~protein dimerization activity,
O08553	dihydropyrimidinase-like 2(Dpysl2)	Mus musculus	GO:0005515~protein binding,GO:0008017~microtubule binding,GO:0016787~hydrolase activity,GO:0016810~hydrolase activity, acting on carbon-nitrogen (but not peptide) bonds,GO:0019901~protein kinase binding,
Q9CWS0	dimethylarginine dimethylaminohydrolase 1(Ddah1)	Mus musculus	GO:0008270~zinc ion binding,GO:0016403~dimethylargininase activity,GO:0016597~amino acid binding,GO:0016787~hydrolase activity,GO:0046872~metal ion binding,
Q62418	drebrin-like(Dbnl)	Mus musculus	GO:0003779~actin binding,GO:0005515~protein binding,GO:0008022~protein C-terminus binding,GO:0019904~protein domain specific binding,GO:0051015~actin filament binding,GO:0098641~cadherin binding involved in cell-cell adhesion,
P39053	dynamin 1(Dnm1)	Mus musculus	GO:0000166~nucleotide binding,GO:0003924~GTPase activity,GO:0005515~protein binding,GO:0005525~GTP binding,GO:0008017~microtubule binding,GO:0008022~protein C-terminus binding,GO:0016787~hydrolase activity,GO:0019901~protein kinase binding,GO:0031749~D2 dopamine receptor binding,GO:0032403~protein complex binding,GO:0042802~identical protein binding,GO:0044822~poly(A) RNA binding,GO:0046983~prote…
P17183	enolase 2, gamma neuronal(Eno2)	Mus musculus	GO:0000287~magnesium ion binding,GO:0004634~phosphopyruvate hydratase activity,GO:0016829~lyase activity,GO:0042803~protein homodimerization activity,GO:0046872~metal ion binding,GO:0046982~protein heterodimerization activity,
Q8BGD9	eukaryotic translation initiation factor 4B(Eif4b)	Mus musculus	GO:0000166~nucleotide binding,GO:0003676~nucleic acid binding,GO:0003723~RNA binding,GO:0003743~translation initiation factor activity,GO:0033592~RNA strand annealing activity,GO:0034057~RNA strand-exchange activity,GO:0043024~ribosomal small subunit binding,GO:0044822~poly(A) RNA binding,
P70445	eukaryotic translation initiation factor 4E binding protein 2(Eif4ebp2)	Mus musculus	GO:0005515~protein binding,GO:0008190~eukaryotic initiation factor 4E binding,GO:0030371~translation repressor activity,
Q9WUK2	eukaryotic translation initiation factor 4H(Eif4h)	Mus musculus	GO:0000166~nucleotide binding,GO:0003676~nucleic acid binding,GO:0003723~RNA binding,GO:0003743~translation initiation factor activity,GO:0033592~RNA strand annealing activity,GO:0034057~RNA strand-exchange activity,GO:0043024~ribosomal small subunit binding,GO:0044822~poly(A) RNA binding,GO:0098641~cadherin binding involved in cell-cell adhesion,
P06745	glucose phosphate isomerase 1(Gpi1)	Mus musculus	GO:0004347~glucose-6-phosphate isomerase activity,GO:0005125~cytokine activity,GO:0008083~growth factor activity,GO:0016853~isomerase activity,GO:0016866~intramolecular transferase activity,GO:0031625~ubiquitin protein ligase binding,GO:0048029~monosaccharide binding,
P70699	glucosidase, alpha, acid(Gaa)	Mus musculus	GO:0003824~catalytic activity,GO:0004553~hydrolase activity, hydrolyzing O-glycosyl compounds,GO:0004558~alpha-1,4-glucosidase activity,GO:0004574~oligo-1,6-glucosidase activity,GO:0016787~hydrolase activity,GO:0016798~hydrolase activity, acting on glycosyl bonds,GO:0030246~carbohydrate binding,GO:0032450~maltose alpha-glucosidase activity,
P16858	glyceraldehyde-3-phosphate dehydrogenase(Gapdh)	Mus musculus	GO:0004365~glyceraldehyde-3-phosphate dehydrogenase (NAD+) (phosphorylating) activity,GO:0008017~microtubule binding,GO:0016620~oxidoreductase activity, acting on the aldehyde or oxo group of donors, NAD or NADP as acceptor,GO:0019899~enzyme binding,GO:0035605~peptidyl-cysteine S-nitrosylase activity,GO:0042802~identical protein binding,GO:0050661~NADP binding,GO:0051287~NAD binding,
P63213	guanine nucleotide binding protein (G protein), gamma 2(Gng2)	Mus musculus	GO:0003924~GTPase activity,GO:0004871~signal transducer activity,GO:0031681~G-protein beta-subunit binding,
Q61016	guanine nucleotide binding protein (G protein), gamma 7(Gng7)	Mus musculus	GO:0004871~signal transducer activity,
Q64433	heat shock protein 1 (chaperonin 10)(Hspe1)	Mus musculus	GO:0005524~ATP binding,GO:0044822~poly(A) RNA binding,GO:0046872~metal ion binding,GO:0051082~unfolded protein binding,GO:0051087~chaperone binding,
P01942	hemoglobin alpha, adult chain 1(Hba-a1)	Mus musculus	GO:0004601~peroxidase activity,GO:0005344~oxygen transporter activity,GO:0005506~iron ion binding,GO:0019825~oxygen binding,GO:0020037~heme binding,GO:0031720~haptoglobin binding,GO:0043177~organic acid binding,
P02088	hemoglobin, beta adult major chain(Hbb-b1)	Mus musculus	GO:0005344~oxygen transporter activity,GO:0005506~iron ion binding,GO:0019825~oxygen binding,GO:0020037~heme binding,
Q6ZWY9	histone cluster 1, H2bc(Hist1h2bc)	Mus musculus	GO:0003677~DNA binding,
P34884	macrophage migration inhibitory factor(Mif)	Mus musculus	GO:0004167~dopachrome isomerase activity,GO:0005102~receptor binding,GO:0005125~cytokine activity,GO:0005126~cytokine receptor binding,GO:0016853~isomerase activity,GO:0032403~protein complex binding,GO:0042056~chemoattractant activity,GO:0050178~phenylpyruvate tautomerase activity,
P08249	malate dehydrogenase 2, NAD (mitochondrial)(Mdh2)	Mus musculus	GO:0003824~catalytic activity,GO:0016491~oxidoreductase activity,GO:0016615~malate dehydrogenase activity,GO:0016616~oxidoreductase activity, acting on the CH-OH group of donors, NAD or NADP as acceptor,GO:0030060~L-malate dehydrogenase activity,GO:0043621~protein self-association,GO:0044822~poly(A) RNA binding,GO:0046554~malate dehydrogenase (NADP+) activity,
P20357	microtubule-associated protein 2(Map2)	Mus musculus	GO:0002162~dystroglycan binding,GO:0005515~protein binding,GO:0005516~calmodulin binding,GO:0005519~cytoskeletal regulatory protein binding,GO:0008017~microtubule binding,GO:0015631~tubulin binding,
Q7TSJ2	microtubule-associated protein 6(Map6)	Mus musculus	GO:0005516~calmodulin binding,GO:0008017~microtubule binding,
P10637	microtubule-associated protein tau(Mapt)	Mus musculus	GO:0005515~protein binding,GO:0008017~microtubule binding,GO:0015631~tubulin binding,GO:0017124~SH3 domain binding,GO:0019899~enzyme binding,GO:0019901~protein kinase binding,GO:0019904~protein domain specific binding,GO:0032403~protein complex binding,GO:0034185~apolipoprotein binding,GO:0051721~protein phosphatase 2A binding,GO:0051879~Hsp90 protein binding,GO:0071813~lipoprotein particle bindi…
P04370	myelin basic protein(Mbp)	Mus musculus	GO:0002020~protease binding,GO:0019911~structural constituent of myelin sheath,
P20917	myelin-associated glycoprotein(Mag)	Mus musculus	GO:0005102~receptor binding,GO:0005515~protein binding,GO:0019901~protein kinase binding,GO:0030246~carbohydrate binding,
Q9CQ19	myosin, light polypeptide 9, regulatory(Myl9)	Mus musculus	GO:0005509~calcium ion binding,GO:0032036~myosin heavy chain binding,GO:0046872~metal ion binding,
P62774	myotrophin(Mtpn)	Mus musculus	GO:0043565~sequence-specific DNA binding,
Q9DC07	nebulette(Nebl)	Mus musculus	GO:0003779~actin binding,GO:0008092~cytoskeletal protein binding,GO:0008270~zinc ion binding,GO:0046872~metal ion binding,
P08551	neurofilament, light polypeptide(Nefl)	Mus musculus	GO:0005198~structural molecule activity,GO:0005200~structural constituent of cytoskeleton,GO:0005515~protein binding,GO:0008022~protein C-terminus binding,GO:0019904~protein domain specific binding,GO:0030674~protein binding, bridging,GO:0042802~identical protein binding,GO:0043274~phospholipase binding,GO:0046982~protein heterodimerization activity,
P60761	neurogranin(Nrgn)	Mus musculus	GO:0005516~calmodulin binding,GO:0005547~phosphatidylinositol-3,4,5-trisphosphate binding,GO:0070300~phosphatidic acid binding,
P17742	peptidylprolyl isomerase A(Ppia)	Mus musculus	GO:0003755~peptidyl-prolyl cis-trans isomerase activity,GO:0005515~protein binding,GO:0016018~cyclosporin A binding,GO:0016853~isomerase activity,GO:0042277~peptide binding,GO:0044822~poly(A) RNA binding,
P99029	peroxiredoxin 5(Prdx5)	Mus musculus	GO:0001016~RNA polymerase III regulatory region DNA binding,GO:0004601~peroxidase activity,GO:0005102~receptor binding,GO:0008379~thioredoxin peroxidase activity,GO:0016209~antioxidant activity,GO:0016491~oxidoreductase activity,GO:0043027~cysteine-type endopeptidase inhibitor activity involved in apoptotic process,GO:0046983~protein dimerization activity,GO:0051920~peroxiredoxin activity,
O08709	peroxiredoxin 6(Prdx6)	Mus musculus	GO:0003824~catalytic activity,GO:0004601~peroxidase activity,GO:0004602~glutathione peroxidase activity,GO:0016209~antioxidant activity,GO:0016491~oxidoreductase activity,GO:0016787~hydrolase activity,GO:0031625~ubiquitin protein ligase binding,GO:0051920~peroxiredoxin activity,GO:0098641~cadherin binding involved in cell-cell adhesion,
P70296	phosphatidylethanolamine binding protein 1(Pebp1)	Mus musculus	GO:0000166~nucleotide binding,GO:0004867~serine-type endopeptidase inhibitor activity,GO:0005102~receptor binding,GO:0005524~ATP binding,GO:0008289~lipid binding,GO:0019899~enzyme binding,GO:0019900~kinase binding,GO:0019901~protein kinase binding,GO:0030414~peptidase inhibitor activity,GO:0044822~poly(A) RNA binding,GO:0051019~mitogen-activated protein kinase binding,
Q9QYX7	piccolo (presynaptic cytomatrix protein)(Pclo)	Mus musculus	GO:0001222~transcription corepressor binding,GO:0005509~calcium ion binding,GO:0005515~protein binding,GO:0005522~profilin binding,GO:0005544~calcium-dependent phospholipid binding,GO:0046872~metal ion binding,
Q9JM63	potassium inwardly-rectifying channel, subfamily J, member 10(Kcnj10)	Mus musculus	GO:0000166~nucleotide binding,GO:0005102~receptor binding,GO:0005242~inward rectifier potassium channel activity,GO:0005244~voltage-gated ion channel activity,GO:0005267~potassium channel activity,GO:0005515~protein binding,GO:0005524~ATP binding,GO:0015272~ATP-activated inward rectifier potassium channel activity,GO:0042802~identical protein binding,
Q08460	potassium large conductance calcium-activated channel, subfamily M, alpha member 1(Kcnma1)	Mus musculus	GO:0003779~actin binding,GO:0005198~structural molecule activity,GO:0005216~ion channel activity,GO:0005244~voltage-gated ion channel activity,GO:0005249~voltage-gated potassium channel activity,GO:0005267~potassium channel activity,GO:0005515~protein binding,GO:0015269~calcium-activated potassium channel activity,GO:0032403~protein complex binding,GO:0042803~protein homodimerization activity,GO:…
Q9CWM4	prefoldin 1(Pfdn1)	Mus musculus	GO:0044183~protein binding involved in protein folding,GO:0051082~unfolded protein binding,
Q64387	prepronociceptin(Pnoc)	Mus musculus	GO:0001515~opioid peptide activity,GO:0005184~neuropeptide hormone activity,GO:0031628~opioid receptor binding,
Q9QXV0	proprotein convertase subtilisin/kexin type 1 inhibitor(Pcsk1n)	Mus musculus	GO:0004866~endopeptidase inhibitor activity,GO:0004867~serine-type endopeptidase inhibitor activity,
P21661	proprotein convertase subtilisin/kexin type 2(Pcsk2)	Mus musculus	GO:0004175~endopeptidase activity,GO:0004252~serine-type endopeptidase activity,GO:0008233~peptidase activity,GO:0008236~serine-type peptidase activity,GO:0016787~hydrolase activity,GO:0032403~protein complex binding,
Q60692	proteasome (prosome, macropain) subunit, beta type 6(Psmb6)	Mus musculus	GO:0004175~endopeptidase activity,GO:0004298~threonine-type endopeptidase activity,GO:0008233~peptidase activity,GO:0016787~hydrolase activity,GO:0098641~cadherin binding involved in cell-cell adhesion,
Q61644	protein kinase C and casein kinase substrate in neurons 1(Pacsin1)	Mus musculus	GO:0005515~protein binding,GO:0005543~phospholipid binding,GO:0008092~cytoskeletal protein binding,GO:0008289~lipid binding,
P14869	ribosomal protein, large, P0(Rplp0)	Mus musculus	GO:0003735~structural constituent of ribosome,GO:0042277~peptide binding,GO:0044822~poly(A) RNA binding,GO:0070180~large ribosomal subunit rRNA binding,
Q9CZC8	secernin 1(Scrn1)	Mus musculus	GO:0016805~dipeptidase activity,
Q8K021	secretory carrier membrane protein 1(Scamp1)	Mus musculus	GO:0005515~protein binding,GO:0019904~protein domain specific binding,
P97797	signal-regulatory protein alpha(Sirpa)	Mus musculus	GO:0005515~protein binding,GO:0017124~SH3 domain binding,GO:0045309~protein phosphorylated amino acid binding,
Q8BLE7	solute carrier family 17 (sodium-dependent inorganic phosphate cotransporter), member 6(Slc17a6)	Mus musculus	GO:0005313~L-glutamate transmembrane transporter activity,GO:0015293~symporter activity,
Q9D6M3	solute carrier family 25 (mitochondrial carrier, glutamate), member 22(Slc25a22)	Mus musculus	GO:0003735~structural constituent of ribosome,GO:0005313~L-glutamate transmembrane transporter activity,GO:0015293~symporter activity,
Q60738	solute carrier family 30 (zinc transporter), member 1(Slc30a1)	Mus musculus	GO:0005385~zinc ion transmembrane transporter activity,GO:0008324~cation transmembrane transporter activity,GO:0019855~calcium channel inhibitor activity,
P97441	solute carrier family 30 (zinc transporter), member 3(Slc30a3)	Mus musculus	GO:0005385~zinc ion transmembrane transporter activity,GO:0008324~cation transmembrane transporter activity,
Q9WTR6	solute carrier family 7 (cationic amino acid transporter, y+ system), member 11(Slc7a11)	Mus musculus	GO:0015171~amino acid transmembrane transporter activity,GO:0015327~cystine:glutamate antiporter activity,
O88935	synapsin I(Syn1)	Mus musculus	GO:0003824~catalytic activity,GO:0005515~protein binding,GO:0005524~ATP binding,GO:0019901~protein kinase binding,GO:0046983~protein dimerization activity,GO:0048306~calcium-dependent protein binding,
Q64332	synapsin II(Syn2)	Mus musculus	GO:0003824~catalytic activity,GO:0005515~protein binding,GO:0005524~ATP binding,GO:0046983~protein dimerization activity,GO:0048306~calcium-dependent protein binding,
P60879	synaptosomal-associated protein 25(Snap25)	Mus musculus	GO:0000149~SNARE binding,GO:0005249~voltage-gated potassium channel activity,GO:0005484~SNAP receptor activity,GO:0005515~protein binding,GO:0017022~myosin binding,GO:0017075~syntaxin-1 binding,GO:0019904~protein domain specific binding,GO:0044325~ion channel binding,GO:0047485~protein N-terminus binding,GO:0048306~calcium-dependent protein binding,
Q61548	synaptosomal-associated protein 91(Snap91)	Mus musculus	GO:0005515~protein binding,GO:0005543~phospholipid binding,GO:0005545~1-phosphatidylinositol binding,GO:0019901~protein kinase binding,GO:0030276~clathrin binding,GO:0032050~clathrin heavy chain binding,
Q9ER00	syntaxin 12(Stx12)	Mus musculus	GO:0000149~SNARE binding,GO:0005484~SNAP receptor activity,GO:0005515~protein binding,
O55042	synuclein, alpha(Snca)	Mus musculus	GO:0000287~magnesium ion binding,GO:0005507~copper ion binding,GO:0005509~calcium ion binding,GO:0005543~phospholipid binding,GO:0008017~microtubule binding,GO:0008198~ferrous iron binding,GO:0008270~zinc ion binding,GO:0016491~oxidoreductase activity,GO:0019894~kinesin binding,GO:0019899~enzyme binding,GO:0019904~protein domain specific binding,GO:0042393~histone binding,GO:0042802~identical pro…
Q91ZZ3	synuclein, beta(Sncb)	Mus musculus	GO:0005509~calcium ion binding,GO:0043014~alpha-tubulin binding,GO:0048487~beta-tubulin binding,
Q6ZWY8	thymosin, beta 10(Tmsb10)	Mus musculus	GO:0003785~actin monomer binding,
P62073	translocase of inner mitochondrial membrane 10(Timm10)	Mus musculus	GO:0005215~transporter activity,GO:0008565~protein transporter activity,GO:0042803~protein homodimerization activity,GO:0046872~metal ion binding,GO:0051087~chaperone binding,
P17751	triosephosphate isomerase 1(Tpi1)	Mus musculus	GO:0003824~catalytic activity,GO:0004807~triose-phosphate isomerase activity,GO:0016853~isomerase activity,GO:0031625~ubiquitin protein ligase binding,
Q7TQD2	tubulin polymerization promoting protein(Tppp)	Mus musculus	GO:0008017~microtubule binding,GO:0015631~tubulin binding,
P68369	tubulin, alpha 1A(Tuba1a)	Mus musculus	GO:0000166~nucleotide binding,GO:0003924~GTPase activity,GO:0005200~structural constituent of cytoskeleton,GO:0005525~GTP binding,GO:0019904~protein domain specific binding,
Q7TMM9	tubulin, beta 2A class IIA(Tubb2a)	Mus musculus	GO:0000166~nucleotide binding,GO:0003924~GTPase activity,GO:0005200~structural constituent of cytoskeleton,GO:0005525~GTP binding,
P68372	tubulin, beta 4B class IVB(Tubb4b)	Mus musculus	GO:0000166~nucleotide binding,GO:0003725~double-stranded RNA binding,GO:0003924~GTPase activity,GO:0005200~structural constituent of cytoskeleton,GO:0005525~GTP binding,
P63028	tumor protein, translationally-controlled 1(Tpt1)	Mus musculus	GO:0005509~calcium ion binding,GO:0008017~microtubule binding,GO:0008134~transcription factor binding,GO:0044822~poly(A) RNA binding,
Q9D3A9	tweety family member 1(Ttyh1)	Mus musculus	GO:0005254~chloride channel activity,GO:0005509~calcium ion binding,GO:0072320~volume-sensitive chloride channel activity,
Q6P5F7	tweety family member 3(Ttyh3)	Mus musculus	GO:0005229~intracellular calcium activated chloride channel activity,GO:0005254~chloride channel activity,
Q9CQV8	tyrosine 3-monooxygenase/tryptophan 5-monooxygenase activation protein, beta polypeptide(Ywhab)	Mus musculus	GO:0003714~transcription corepressor activity,GO:0004497~monooxygenase activity,GO:0005515~protein binding,GO:0008022~protein C-terminus binding,GO:0019899~enzyme binding,GO:0019904~protein domain specific binding,GO:0032403~protein complex binding,GO:0042826~histone deacetylase binding,GO:0050815~phosphoserine binding,GO:0051219~phosphoprotein binding,GO:0098641~cadherin binding involved in cell…
P61982	tyrosine 3-monooxygenase/tryptophan 5-monooxygenase activation protein, gamma polypeptide(Ywhag)	Mus musculus	GO:0003779~actin binding,GO:0004497~monooxygenase activity,GO:0005080~protein kinase C binding,GO:0005159~insulin-like growth factor receptor binding,GO:0005515~protein binding,GO:0019904~protein domain specific binding,GO:0030971~receptor tyrosine kinase binding,GO:0044822~poly(A) RNA binding,
Q9DB77	ubiquinol cytochrome c reductase core protein 2(Uqcrc2)	Mus musculus	GO:0003824~catalytic activity,GO:0004222~metalloendopeptidase activity,GO:0008270~zinc ion binding,GO:0032403~protein complex binding,GO:0046872~metal ion binding,
Q9D855	ubiquinol-cytochrome c reductase binding protein(Uqcrb)	Mus musculus	GO:0008121~ubiquinol-cytochrome-c reductase activity,
P61089	ubiquitin-conjugating enzyme E2N(Ube2n)	Mus musculus	GO:0000166~nucleotide binding,GO:0004842~ubiquitin-protein transferase activity,GO:0005515~protein binding,GO:0005524~ATP binding,GO:0016740~transferase activity,GO:0031625~ubiquitin protein ligase binding,GO:0043130~ubiquitin binding,GO:0044822~poly(A) RNA binding,GO:0061630~ubiquitin protein ligase activity,GO:0061631~ubiquitin conjugating enzyme activity,
Q60932	voltage-dependent anion channel 1(Vdac1)	Mus musculus	GO:0000166~nucleotide binding,GO:0005253~anion channel activity,GO:0005515~protein binding,GO:0008308~voltage-gated anion channel activity,GO:0015288~porin activity,GO:0019901~protein kinase binding,GO:0032403~protein complex binding,GO:0044325~ion channel binding,

## Sheet: KEGG
ID	Gene Name	Species	KEGG_PATHWAY
P56480	ATP synthase, H+ transporting mitochondrial F1 complex, beta subunit(Atp5b)	Mus musculus	mmu00190:Oxidative phosphorylation,mmu01100:Metabolic pathways,mmu05010:Alzheimer's disease,mmu05012:Parkinson's disease,mmu05016:Huntington's disease,
Q9DCX2	ATP synthase, H+ transporting, mitochondrial F0 complex, subunit D(Atp5h)	Mus musculus	mmu00190:Oxidative phosphorylation,mmu01100:Metabolic pathways,mmu05010:Alzheimer's disease,mmu05012:Parkinson's disease,mmu05016:Huntington's disease,
P97450	ATP synthase, H+ transporting, mitochondrial F0 complex, subunit F(Atp5j)	Mus musculus	mmu00190:Oxidative phosphorylation,mmu01100:Metabolic pathways,mmu05010:Alzheimer's disease,mmu05012:Parkinson's disease,mmu05016:Huntington's disease,
Q9D3D9	ATP synthase, H+ transporting, mitochondrial F1 complex, delta subunit(Atp5d)	Mus musculus	mmu00190:Oxidative phosphorylation,mmu01100:Metabolic pathways,mmu05010:Alzheimer's disease,mmu05012:Parkinson's disease,mmu05016:Huntington's disease,
P56382	ATP synthase, H+ transporting, mitochondrial F1 complex, epsilon subunit(Atp5e)	Mus musculus	mmu00190:Oxidative phosphorylation,mmu01100:Metabolic pathways,mmu05010:Alzheimer's disease,mmu05012:Parkinson's disease,mmu05016:Huntington's disease,
Q06185	ATP synthase, H+ transporting, mitochondrial F1F0 complex, subunit E(Atp5k)	Mus musculus	mmu00190:Oxidative phosphorylation,mmu01100:Metabolic pathways,
Q9CR51	ATPase, H+ transporting, lysosomal V1 subunit G1(Atp6v1g1)	Mus musculus	mmu00190:Oxidative phosphorylation,mmu01100:Metabolic pathways,mmu04145:Phagosome,mmu04721:Synaptic vesicle cycle,mmu04966:Collecting duct acid secretion,mmu05323:Rheumatoid arthritis,
Q9WTT4	ATPase, H+ transporting, lysosomal V1 subunit G2(Atp6v1g2)	Mus musculus	mmu00190:Oxidative phosphorylation,mmu01100:Metabolic pathways,mmu04145:Phagosome,mmu04721:Synaptic vesicle cycle,mmu04966:Collecting duct acid secretion,mmu05323:Rheumatoid arthritis,
Q9Z1P6	NADH dehydrogenase (ubiquinone) 1 alpha subcomplex, 7 (B14.5a)(Ndufa7)	Mus musculus	mmu00190:Oxidative phosphorylation,mmu01100:Metabolic pathways,mmu04932:Non-alcoholic fatty liver disease (NAFLD),mmu05010:Alzheimer's disease,mmu05012:Parkinson's disease,mmu05016:Huntington's disease,
P52503	NADH dehydrogenase (ubiquinone) Fe-S protein 6(Ndufs6)	Mus musculus	mmu00190:Oxidative phosphorylation,mmu01100:Metabolic pathways,mmu04932:Non-alcoholic fatty liver disease (NAFLD),mmu05010:Alzheimer's disease,mmu05012:Parkinson's disease,mmu05016:Huntington's disease,
P62827	RAN, member RAS oncogene family(Ran)	Mus musculus	mmu03008:Ribosome biogenesis in eukaryotes,mmu03013:RNA transport,mmu05166:HTLV-I infection,
Q68FL4	S-adenosylhomocysteine hydrolase-like 2(Ahcyl2)	Mus musculus	mmu00270:Cysteine and methionine metabolism,mmu01100:Metabolic pathways,
Q62420	SH3-domain GRB2-like 2(Sh3gl2)	Mus musculus	mmu04144:Endocytosis,
Q9JM76	actin related protein 2/3 complex, subunit 3(Arpc3)	Mus musculus	mmu04144:Endocytosis,mmu04666:Fc gamma R-mediated phagocytosis,mmu04810:Regulation of actin cytoskeleton,mmu05100:Bacterial invasion of epithelial cells,mmu05132:Salmonella infection,
P05064	aldolase A, fructose-bisphosphate(Aldoa)	Mus musculus	mmu00010:Glycolysis / Gluconeogenesis,mmu00030:Pentose phosphate pathway,mmu00051:Fructose and mannose metabolism,mmu01100:Metabolic pathways,mmu01130:Biosynthesis of antibiotics,mmu01200:Carbon metabolism,mmu01230:Biosynthesis of amino acids,
P06797	cathepsin L(Ctsl)	Mus musculus	mmu04142:Lysosome,mmu04145:Phagosome,mmu04612:Antigen processing and presentation,mmu05205:Proteoglycans in cancer,mmu05323:Rheumatoid arthritis,
P18760	cofilin 1, non-muscle(Cfl1)	Mus musculus	mmu04360:Axon guidance,mmu04666:Fc gamma R-mediated phagocytosis,mmu04810:Regulation of actin cytoskeleton,mmu05133:Pertussis,
O35658	complement component 1, q subcomponent binding protein(C1qbp)	Mus musculus	mmu05168:Herpes simplex infection,
P63040	complexin 1(Cplx1)	Mus musculus	mmu04721:Synaptic vesicle cycle,
Q04447	creatine kinase, brain(Ckb)	Mus musculus	mmu00330:Arginine and proline metabolism,mmu01100:Metabolic pathways,
P23927	crystallin, alpha B(Cryab)	Mus musculus	mmu04141:Protein processing in endoplasmic reticulum,
P56393	cytochrome c oxidase subunit VIIb(Cox7b)	Mus musculus	mmu00190:Oxidative phosphorylation,mmu01100:Metabolic pathways,mmu04260:Cardiac muscle contraction,mmu04932:Non-alcoholic fatty liver disease (NAFLD),mmu05010:Alzheimer's disease,mmu05012:Parkinson's disease,mmu05016:Huntington's disease,
P43024	cytochrome c oxidase subunit VIa polypeptide 1(Cox6a1)	Mus musculus	mmu00190:Oxidative phosphorylation,mmu01100:Metabolic pathways,mmu04260:Cardiac muscle contraction,mmu04932:Non-alcoholic fatty liver disease (NAFLD),mmu05010:Alzheimer's disease,mmu05012:Parkinson's disease,mmu05016:Huntington's disease,
P12787	cytochrome c oxidase subunit Va(Cox5a)	Mus musculus	mmu00190:Oxidative phosphorylation,mmu01100:Metabolic pathways,mmu04260:Cardiac muscle contraction,mmu04932:Non-alcoholic fatty liver disease (NAFLD),mmu05010:Alzheimer's disease,mmu05012:Parkinson's disease,mmu05016:Huntington's disease,
P56391	cytochrome c oxidase, subunit VIb polypeptide 1(Cox6b1)	Mus musculus	mmu00190:Oxidative phosphorylation,mmu01100:Metabolic pathways,mmu04260:Cardiac muscle contraction,mmu04932:Non-alcoholic fatty liver disease (NAFLD),mmu05010:Alzheimer's disease,mmu05012:Parkinson's disease,mmu05016:Huntington's disease,
P62897	cytochrome c, somatic(Cycs)	Mus musculus	mmu04115:p53 signaling pathway,mmu04210:Apoptosis,mmu04932:Non-alcoholic fatty liver disease (NAFLD),mmu05010:Alzheimer's disease,mmu05012:Parkinson's disease,mmu05014:Amyotrophic lateral sclerosis (ALS),mmu05016:Huntington's disease,mmu05134:Legionellosis,mmu05145:Toxoplasmosis,mmu05152:Tuberculosis,mmu05161:Hepatitis B,mmu05164:Influenza A,mmu05168:Herpes simplex infection,mmu05200:Pathways in …
P31786	diazepam binding inhibitor(Dbi)	Mus musculus	mmu03320:PPAR signaling pathway,
O08553	dihydropyrimidinase-like 2(Dpysl2)	Mus musculus	mmu04360:Axon guidance,
P39053	dynamin 1(Dnm1)	Mus musculus	mmu04144:Endocytosis,mmu04721:Synaptic vesicle cycle,mmu04961:Endocrine and other factor-regulated calcium reabsorption,mmu05100:Bacterial invasion of epithelial cells,
P17183	enolase 2, gamma neuronal(Eno2)	Mus musculus	mmu00010:Glycolysis / Gluconeogenesis,mmu01100:Metabolic pathways,mmu01130:Biosynthesis of antibiotics,mmu01200:Carbon metabolism,mmu01230:Biosynthesis of amino acids,mmu03018:RNA degradation,mmu04066:HIF-1 signaling pathway,
Q8BGD9	eukaryotic translation initiation factor 4B(Eif4b)	Mus musculus	mmu03013:RNA transport,mmu04150:mTOR signaling pathway,mmu04151:PI3K-Akt signaling pathway,mmu05205:Proteoglycans in cancer,
P70445	eukaryotic translation initiation factor 4E binding protein 2(Eif4ebp2)	Mus musculus	mmu03013:RNA transport,
P06745	glucose phosphate isomerase 1(Gpi1)	Mus musculus	mmu00010:Glycolysis / Gluconeogenesis,mmu00030:Pentose phosphate pathway,mmu00500:Starch and sucrose metabolism,mmu00520:Amino sugar and nucleotide sugar metabolism,mmu01100:Metabolic pathways,mmu01130:Biosynthesis of antibiotics,mmu01200:Carbon metabolism,
P70699	glucosidase, alpha, acid(Gaa)	Mus musculus	mmu00052:Galactose metabolism,mmu00500:Starch and sucrose metabolism,mmu01100:Metabolic pathways,mmu04142:Lysosome,
P16858	glyceraldehyde-3-phosphate dehydrogenase(Gapdh)	Mus musculus	mmu00010:Glycolysis / Gluconeogenesis,mmu01100:Metabolic pathways,mmu01130:Biosynthesis of antibiotics,mmu01200:Carbon metabolism,mmu01230:Biosynthesis of amino acids,mmu04066:HIF-1 signaling pathway,mmu05010:Alzheimer's disease,
P63213	guanine nucleotide binding protein (G protein), gamma 2(Gng2)	Mus musculus	mmu04014:Ras signaling pathway,mmu04062:Chemokine signaling pathway,mmu04151:PI3K-Akt signaling pathway,mmu04713:Circadian entrainment,mmu04723:Retrograde endocannabinoid signaling,mmu04724:Glutamatergic synapse,mmu04725:Cholinergic synapse,mmu04726:Serotonergic synapse,mmu04727:GABAergic synapse,mmu04728:Dopaminergic synapse,mmu05032:Morphine addiction,mmu05034:Alcoholism,mmu05200:Pathways in ca…
Q61016	guanine nucleotide binding protein (G protein), gamma 7(Gng7)	Mus musculus	mmu04014:Ras signaling pathway,mmu04062:Chemokine signaling pathway,mmu04151:PI3K-Akt signaling pathway,mmu04713:Circadian entrainment,mmu04723:Retrograde endocannabinoid signaling,mmu04724:Glutamatergic synapse,mmu04725:Cholinergic synapse,mmu04726:Serotonergic synapse,mmu04727:GABAergic synapse,mmu04728:Dopaminergic synapse,mmu05032:Morphine addiction,mmu05034:Alcoholism,mmu05200:Pathways in ca…
P01942	hemoglobin alpha, adult chain 1(Hba-a1)	Mus musculus	mmu05143:African trypanosomiasis,mmu05144:Malaria,
P02088	hemoglobin, beta adult major chain(Hbb-b1)	Mus musculus	mmu05143:African trypanosomiasis,mmu05144:Malaria,
Q6ZWY9	histone cluster 1, H2bc(Hist1h2bc)	Mus musculus	mmu05034:Alcoholism,mmu05203:Viral carcinogenesis,mmu05322:Systemic lupus erythematosus,
P34884	macrophage migration inhibitory factor(Mif)	Mus musculus	mmu00350:Tyrosine metabolism,mmu00360:Phenylalanine metabolism,
P08249	malate dehydrogenase 2, NAD (mitochondrial)(Mdh2)	Mus musculus	mmu00020:Citrate cycle (TCA cycle),mmu00270:Cysteine and methionine metabolism,mmu00620:Pyruvate metabolism,mmu00630:Glyoxylate and dicarboxylate metabolism,mmu01100:Metabolic pathways,mmu01130:Biosynthesis of antibiotics,mmu01200:Carbon metabolism,
P10637	microtubule-associated protein tau(Mapt)	Mus musculus	mmu04010:MAPK signaling pathway,mmu05010:Alzheimer's disease,
P20917	myelin-associated glycoprotein(Mag)	Mus musculus	mmu04514:Cell adhesion molecules (CAMs),
Q9CQ19	myosin, light polypeptide 9, regulatory(Myl9)	Mus musculus	mmu04022:cGMP-PKG signaling pathway,mmu04024:cAMP signaling pathway,mmu04270:Vascular smooth muscle contraction,mmu04510:Focal adhesion,mmu04530:Tight junction,mmu04670:Leukocyte transendothelial migration,mmu04810:Regulation of actin cytoskeleton,mmu04921:Oxytocin signaling pathway,
P08551	neurofilament, light polypeptide(Nefl)	Mus musculus	mmu05014:Amyotrophic lateral sclerosis (ALS),
P99029	peroxiredoxin 5(Prdx5)	Mus musculus	mmu04146:Peroxisome,
O08709	peroxiredoxin 6(Prdx6)	Mus musculus	mmu01100:Metabolic pathways,
Q9QYX7	piccolo (presynaptic cytomatrix protein)(Pclo)	Mus musculus	mmu04911:Insulin secretion,
Q9JM63	potassium inwardly-rectifying channel, subfamily J, member 10(Kcnj10)	Mus musculus	mmu04971:Gastric acid secretion,
Q08460	potassium large conductance calcium-activated channel, subfamily M, alpha member 1(Kcnma1)	Mus musculus	mmu04022:cGMP-PKG signaling pathway,mmu04270:Vascular smooth muscle contraction,mmu04911:Insulin secretion,mmu04924:Renin secretion,mmu04970:Salivary secretion,mmu04972:Pancreatic secretion,
Q60692	proteasome (prosome, macropain) subunit, beta type 6(Psmb6)	Mus musculus	mmu03050:Proteasome,
P14869	ribosomal protein, large, P0(Rplp0)	Mus musculus	mmu03010:Ribosome,
P97797	signal-regulatory protein alpha(Sirpa)	Mus musculus	mmu04380:Osteoclast differentiation,
Q8BLE7	solute carrier family 17 (sodium-dependent inorganic phosphate cotransporter), member 6(Slc17a6)	Mus musculus	mmu04721:Synaptic vesicle cycle,mmu04723:Retrograde endocannabinoid signaling,mmu04724:Glutamatergic synapse,mmu05033:Nicotine addiction,
Q60738	solute carrier family 30 (zinc transporter), member 1(Slc30a1)	Mus musculus	mmu04978:Mineral absorption,
P60879	synaptosomal-associated protein 25(Snap25)	Mus musculus	mmu04721:Synaptic vesicle cycle,mmu04911:Insulin secretion,
Q9ER00	syntaxin 12(Stx12)	Mus musculus	mmu04145:Phagosome,
O55042	synuclein, alpha(Snca)	Mus musculus	mmu05010:Alzheimer's disease,mmu05012:Parkinson's disease,
P17751	triosephosphate isomerase 1(Tpi1)	Mus musculus	mmu00010:Glycolysis / Gluconeogenesis,mmu00051:Fructose and mannose metabolism,mmu00562:Inositol phosphate metabolism,mmu01100:Metabolic pathways,mmu01130:Biosynthesis of antibiotics,mmu01200:Carbon metabolism,mmu01230:Biosynthesis of amino acids,
P68369	tubulin, alpha 1A(Tuba1a)	Mus musculus	mmu04145:Phagosome,mmu04540:Gap junction,
Q7TMM9	tubulin, beta 2A class IIA(Tubb2a)	Mus musculus	mmu04145:Phagosome,mmu04540:Gap junction,
P68372	tubulin, beta 4B class IVB(Tubb4b)	Mus musculus	mmu04145:Phagosome,mmu04540:Gap junction,
Q9CQV8	tyrosine 3-monooxygenase/tryptophan 5-monooxygenase activation protein, beta polypeptide(Ywhab)	Mus musculus	mmu04110:Cell cycle,mmu04114:Oocyte meiosis,mmu04151:PI3K-Akt signaling pathway,mmu04390:Hippo signaling pathway,mmu05161:Hepatitis B,mmu05203:Viral carcinogenesis,
P61982	tyrosine 3-monooxygenase/tryptophan 5-monooxygenase activation protein, gamma polypeptide(Ywhag)	Mus musculus	mmu04110:Cell cycle,mmu04114:Oocyte meiosis,mmu04151:PI3K-Akt signaling pathway,mmu04390:Hippo signaling pathway,mmu05203:Viral carcinogenesis,
Q9DB77	ubiquinol cytochrome c reductase core protein 2(Uqcrc2)	Mus musculus	mmu00190:Oxidative phosphorylation,mmu01100:Metabolic pathways,mmu04260:Cardiac muscle contraction,mmu04932:Non-alcoholic fatty liver disease (NAFLD),mmu05010:Alzheimer's disease,mmu05012:Parkinson's disease,mmu05016:Huntington's disease,
Q9D855	ubiquinol-cytochrome c reductase binding protein(Uqcrb)	Mus musculus	mmu00190:Oxidative phosphorylation,mmu01100:Metabolic pathways,mmu04260:Cardiac muscle contraction,mmu04932:Non-alcoholic fatty liver disease (NAFLD),mmu05010:Alzheimer's disease,mmu05012:Parkinson's disease,mmu05016:Huntington's disease,
P61089	ubiquitin-conjugating enzyme E2N(Ube2n)	Mus musculus	mmu04120:Ubiquitin mediated proteolysis,
Q60932	voltage-dependent anion channel 1(Vdac1)	Mus musculus	mmu04020:Calcium signaling pathway,mmu04022:cGMP-PKG signaling pathway,mmu05012:Parkinson's disease,mmu05016:Huntington's disease,mmu05164:Influenza A,mmu05166:HTLV-I infection,

## Sheet: BP enrichment
Category	Term	Count	%	PValue	Genes	List Total	Pop Hits	Pop Total	Fold Enrichment	Bonferroni	Benjamini	FDR
GOTERM_BP_DIRECT	GO:0006810~transport	35	27.5591	2.44911e-08	Q9Z1P6, Q06185, Q9WTT4, Q08460, P97441, P07724, Q9ER00, Q7TSJ2, Q61792, Q6P5F7, Q9WTR6, Q8BLE7, P62073, Q9D3D9, Q9DCX2, P56382, P56480, Q9DB77, P97450, Q9CWZ7, Q61548, P62827, Q60932, Q9D855, Q62418, Q9CR51, P63040, P52503, P31786, Q9D3A9, Q9JM63, Q60738, Q9D6M3, Q8K021, Q9DCU2	123	1822	18082	2.82398	1.80253e-05	1.80254e-05	1.77071e-05
GOTERM_BP_DIRECT	GO:0015992~proton transport	8	6.29921	1.20991e-07	P97450, Q06185, Q9WTT4, Q9D3D9, Q9CR51, Q9DCX2, P56382, P56480	123	58	18082	20.277	8.90454e-05	4.45247e-05	4.37382e-05
GOTERM_BP_DIRECT	GO:0015986~ATP synthesis coupled proton transport	6	4.72441	3.93095e-07	P97450, Q06185, Q9D3D9, Q9DCX2, P56382, P56480	123	23	18082	38.3499	0.000289276	7.29433e-05	7.16549e-05
GOTERM_BP_DIRECT	GO:0006811~ion transport	18	14.1732	3.96431e-07	P97450, Q06185, Q9WTT4, Q08460, P97441, Q60932, Q9CR51, Q61792, Q6P5F7, Q8BLE7, Q9D3A9, Q9JM63, Q9D3D9, Q60738, Q9DCX2, P56382, P56480, Q9DCU2	123	584	18082	4.53107	0.000291731	7.29433e-05	7.16549e-05
GOTERM_BP_DIRECT	GO:0006754~ATP biosynthetic process	5	3.93701	1.58156e-05	Q06185, Q9D3D9, P05064, P56382, P56480	123	23	18082	31.9583	0.0115729	0.00232806	0.00228694
GOTERM_BP_DIRECT	GO:0006096~glycolytic process	5	3.93701	9.83156e-05	P06745, P16858, P05064, P17183, P17751	123	36	18082	20.4178	0.0698076	0.01206	0.011847
GOTERM_BP_DIRECT	GO:0046034~ATP metabolic process	5	3.93701	0.000149392	P97450, Q06185, Q9D3D9, Q9DCX2, P56480	123	40	18082	18.376	0.104131	0.0157075	0.0154301
GOTERM_BP_DIRECT	GO:0098609~cell-cell adhesion	8	6.29921	0.000297001	Q9CQC6, Q9CQV8, O08709, Q62418, Q9WUK2, P05064, Q60692, Q61792	123	189	18082	6.22257	0.196377	0.0273241	0.0268414
GOTERM_BP_DIRECT	GO:0007269~neurotransmitter secretion	4	3.14961	0.000867878	O88935, P60879, Q61548, Q64332	123	28	18082	21.0012	0.472199	0.0709731	0.0697195
GOTERM_BP_DIRECT	GO:0006457~protein folding	6	4.72441	0.00175975	P23927, P26883, Q9CWM4, Q64433, P80317, P17742	123	128	18082	6.89101	0.726463	0.129518	0.12723
GOTERM_BP_DIRECT	GO:0021762~substantia nigra development	4	3.14961	0.00212787	P97450, Q04447, P04370, P56391	123	38	18082	15.4745	0.791492	0.142374	0.139859
GOTERM_BP_DIRECT	GO:0009409~response to cold	4	3.14961	0.00246781	O89086, Q8VHQ9, Q9QXV0, Q0VGU4	123	40	18082	14.7008	0.837739	0.149884	0.147237
GOTERM_BP_DIRECT	GO:0001662~behavioral fear response	4	3.14961	0.00283952	Q61016, Q60932, P09240, P31786	123	42	18082	14.0008	0.876666	0.149884	0.147237
GOTERM_BP_DIRECT	GO:0006123~mitochondrial electron transport, cytochrome c to oxygen	3	2.3622	0.00285106	P12787, P43024, P62897	123	12	18082	36.752	0.877712	0.149884	0.147237
GOTERM_BP_DIRECT	GO:0006122~mitochondrial electron transport, ubiquinol to cytochrome c	3	2.3622	0.0033546	Q9D855, Q9DB77, P62897	123	13	18082	33.925	0.91568	0.164599	0.161692
GOTERM_BP_DIRECT	GO:0000226~microtubule cytoskeleton organization	5	3.93701	0.0040642	P10637, A2AG50, P16858, Q7TSJ2, P08551	123	96	18082	7.65667	0.950081	0.186953	0.183651
GOTERM_BP_DIRECT	GO:0007010~cytoskeleton organization	5	3.93701	0.00539879	O08553, Q61644, P97797, P18760, Q9QYX7	123	104	18082	7.0677	0.981394	0.233736	0.229608
GOTERM_BP_DIRECT	GO:0048488~synaptic vesicle endocytosis	3	2.3622	0.00574687	Q61644, Q62420, O55042	123	17	18082	25.9426	0.98562	0.234983	0.230832
GOTERM_BP_DIRECT	GO:0007268~chemical synaptic transmission	6	4.72441	0.00622876	Q08460, Q61548, Q60932, Q91ZZ3, Q64387, O55042	123	172	18082	5.12819	0.989935	0.241283	0.237021
GOTERM_BP_DIRECT	GO:0006897~endocytosis	6	4.72441	0.00768683	O08553, Q61644, P39053, Q62418, Q8K021, Q62420	123	181	18082	4.8732	0.996584	0.282875	0.277879
GOTERM_BP_DIRECT	GO:0002026~regulation of the force of heart contraction	3	2.3622	0.0104127	P70296, P26339, P70699	123	23	18082	19.175	0.999549	0.36494	0.358494
GOTERM_BP_DIRECT	GO:0006094~gluconeogenesis	3	2.3622	0.0132012	P06745, P16858, P17751	123	26	18082	16.9625	0.999943	0.412434	0.405149
GOTERM_BP_DIRECT	GO:0021766~hippocampus development	4	3.14961	0.0132286	P62827, P70296, Q61361, P08551	123	73	18082	8.05524	0.999945	0.412434	0.405149
GOTERM_BP_DIRECT	GO:0097010~eukaryotic translation initiation factor 4F complex assembly	2	1.5748	0.0134489	Q9WUK2, Q8BGD9	123	2	18082	147.008	0.999953	0.412434	0.405149
GOTERM_BP_DIRECT	GO:0007015~actin filament organization	4	3.14961	0.0186196	Q61644, P97797, P18760, Q6ZWY8	123	83	18082	7.08473	0.999999	0.548162	0.538479
GOTERM_BP_DIRECT	GO:0032387~negative regulation of intracellular transport	2	1.5748	0.020106	P23927, P10637	123	3	18082	98.0054	1	0.551676	0.541932
GOTERM_BP_DIRECT	GO:0009636~response to toxic substance	4	3.14961	0.020441	P70296, P04370, P08551, Q9WTR6	123	86	18082	6.83759	1	0.551676	0.541932
GOTERM_BP_DIRECT	GO:0002181~cytoplasmic translation	3	2.3622	0.0220043	P14869, Q9WUK2, Q8BGD9	123	34	18082	12.9713	1	0.551676	0.541932
GOTERM_BP_DIRECT	GO:0043524~negative regulation of neuron apoptotic process	5	3.93701	0.0231941	P06745, Q9EQU5, Q91ZZ3, P08551, O55042	123	160	18082	4.594	1	0.551676	0.541932
GOTERM_BP_DIRECT	GO:0061025~membrane fusion	3	2.3622	0.0232364	Q9CWZ7, P39053, Q9ER00	123	35	18082	12.6007	1	0.551676	0.541932
GOTERM_BP_DIRECT	GO:0030073~insulin secretion	3	2.3622	0.0232364	Q0VGU4, P63040, Q9QYX7	123	35	18082	12.6007	1	0.551676	0.541932
GOTERM_BP_DIRECT	GO:0009060~aerobic respiration	3	2.3622	0.0284384	Q9D855, P43024, Q9DB77	123	39	18082	11.3083	1	0.654083	0.64253
GOTERM_BP_DIRECT	GO:0007017~microtubule-based process	3	2.3622	0.0311979	P68369, P68372, Q7TMM9	123	41	18082	10.7567	1	0.685864	0.673749
GOTERM_BP_DIRECT	GO:0048167~regulation of synaptic plasticity	3	2.3622	0.0326158	Q0VGU4, P61982, P70445	123	42	18082	10.5006	1	0.685864	0.673749
GOTERM_BP_DIRECT	GO:0007628~adult walking behavior	3	2.3622	0.0326158	Q08460, Q9JM63, P10637	123	42	18082	10.5006	1	0.685864	0.673749
GOTERM_BP_DIRECT	GO:0007409~axonogenesis	4	3.14961	0.0358377	Q61548, P10637, P09240, P20357	123	107	18082	5.49563	1	0.732682	0.71974
GOTERM_BP_DIRECT	GO:0060291~long-term synaptic potentiation	3	2.3622	0.0432172	P60879, O55042, P31786	123	49	18082	9.0005	1	0.859672	0.844487
GOTERM_BP_DIRECT	GO:0050885~neuromuscular process controlling balance	3	2.3622	0.0584329	Q08460, P08551, P70699	123	58	18082	7.60387	1	1	0.983673
GOTERM_BP_DIRECT	GO:0044070~regulation of anion transport	2	1.5748	0.0591228	Q9D3A9, Q60932	123	9	18082	32.6685	1	1	0.983673
GOTERM_BP_DIRECT	GO:0006898~receptor-mediated endocytosis	3	2.3622	0.0620328	P39053, Q62418, P56480	123	60	18082	7.35041	1	1	0.983673
GOTERM_BP_DIRECT	GO:0061088~regulation of sequestering of zinc ion	2	1.5748	0.0654741	P97441, Q60738	123	10	18082	29.4016	1	1	0.983673
GOTERM_BP_DIRECT	GO:0048812~neuron projection morphogenesis	3	2.3622	0.06757	Q61644, Q62418, P08551	123	63	18082	7.00039	1	1	0.983673
GOTERM_BP_DIRECT	GO:0045454~cell redox homeostasis	3	2.3622	0.0713493	O08709, P99029, Q91VW3	123	65	18082	6.78499	1	1	0.983673
GOTERM_BP_DIRECT	GO:0021707~cerebellar granule cell differentiation	2	1.5748	0.0717829	Q9R171, P62774	123	11	18082	26.7288	1	1	0.983673
GOTERM_BP_DIRECT	GO:0019953~sexual reproduction	2	1.5748	0.0717829	Q9WUK2, Q0VGU4	123	11	18082	26.7288	1	1	0.983673
GOTERM_BP_DIRECT	GO:0014049~positive regulation of glutamate secretion	2	1.5748	0.0717829	O08553, P09240	123	11	18082	26.7288	1	1	0.983673
GOTERM_BP_DIRECT	GO:0016486~peptide hormone processing	2	1.5748	0.0717829	Q9QXV0, P21661	123	11	18082	26.7288	1	1	0.983673
GOTERM_BP_DIRECT	GO:0043154~negative regulation of cysteine-type endopeptidase activity involved in apoptotic process	3	2.3622	0.0751958	P23927, P06745, O55042	123	67	18082	6.58245	1	1	0.983673
GOTERM_BP_DIRECT	GO:0006120~mitochondrial electron transport, NADH to ubiquinone	2	1.5748	0.0780494	Q9Z1P6, P52503	123	12	18082	24.5014	1	1	0.983673
GOTERM_BP_DIRECT	GO:0016540~protein autoprocessing	2	1.5748	0.084274	P21661, P06797	123	13	18082	22.6166	1	1	0.983673
GOTERM_BP_DIRECT	GO:0055114~oxidation-reduction process	9	7.08661	0.0870271	Q9Z1P6, O08709, P99029, Q9D855, P08249, O55042, Q9DB77, P52503, P62897	123	676	18082	1.95721	1	1	0.983673
GOTERM_BP_DIRECT	GO:0051289~protein homotetramerization	3	2.3622	0.0891535	Q08460, Q9JM63, P05064	123	74	18082	5.95979	1	1	0.983673
GOTERM_BP_DIRECT	GO:0042417~dopamine metabolic process	2	1.5748	0.0904569	Q91ZZ3, O55042	123	14	18082	21.0012	1	1	0.983673
GOTERM_BP_DIRECT	GO:0002021~response to dietary excess	2	1.5748	0.0904569	Q9QXV0, Q0VGU4	123	14	18082	21.0012	1	1	0.983673
GOTERM_BP_DIRECT	GO:0042744~hydrogen peroxide catabolic process	2	1.5748	0.0904569	O08709, P99029	123	14	18082	21.0012	1	1	0.983673
GOTERM_BP_DIRECT	GO:0006941~striated muscle contraction	2	1.5748	0.0904569	P05064, P70699	123	14	18082	21.0012	1	1	0.983673
GOTERM_BP_DIRECT	GO:0048489~synaptic vesicle transport	2	1.5748	0.0904569	O08553, O55042	123	14	18082	21.0012	1	1	0.983673

## Sheet: CC enrichment
Category	Term	Count	%	PValue	Genes	List Total	Pop Hits	Pop Total	Fold Enrichment	Bonferroni	Benjamini	FDR
GOTERM_CC_DIRECT	GO:0043209~myelin sheath	34	26.7717	2.08183e-38	P60879, P07724, P16858, P34884, P20917, O08553, P23927, O88935, Q7TQD2, Q9DCX2, P61982, P56480, P08249, Q9DB77, P62897, P02088, Q9CWZ7, Q61644, P06745, Q60932, P70296, P12787, P68372, Q64332, P17742, P68369, P39053, Q04447, P04370, P01942, P05064, P17183, P08551, P43024	126	192	19662	27.6334	5.18376e-36	5.18376e-36	4.41348e-36
GOTERM_CC_DIRECT	GO:0070062~extracellular exosome	60	47.2441	8.35654e-20	O08709, Q9QXV0, Q9ER00, P34884, P16858, P18760, Q61792, Q6P5F7, P17751, Q9QYX7, O08553, Q9JM76, O88456, P61982, P56480, P08249, Q9DB77, P06745, P70296, P97797, Q62418, P12787, Q9CR51, Q64433, P70699, Q7TMM9, P63213, Q8VHQ9, P39053, P01942, P05064, Q91VW3, P06797, Q9DCU2, Q61016, P26883, Q08460, Q9CWS0, P07724, P99029, Q62420, P23927, P61089, Q6ZWY9, Q9DCX2, P62774, P63028, Q9CWZ7, Q9CQV8, P62827,…	126	2674	19662	3.50144	2.08078e-17	1.04039e-17	8.85793e-18
GOTERM_CC_DIRECT	GO:0043195~terminal bouton	13	10.2362	7.31825e-12	Q61644, Q08460, P60879, Q61548, Q64332, P63040, O55042, Q9QYX7, O08553, O88935, P09240, Q91ZZ3, Q8K021	126	113	19662	17.9524	1.82225e-09	6.07415e-10	5.17156e-10
GOTERM_CC_DIRECT	GO:0005743~mitochondrial inner membrane	19	14.9606	4.65727e-11	Q9Z1P6, P97450, Q06185, Q60932, Q9D855, P12787, P52503, P62073, Q9D3D9, Q9DCX2, Q9D6M3, P56382, P43024, P56393, P56480, P08249, P56391, Q9DB77, Q8R404	126	387	19662	7.66125	1.15966e-08	2.89915e-09	2.46835e-09
GOTERM_CC_DIRECT	GO:0005739~mitochondrion	36	28.3465	3.32959e-10	Q9Z1P6, Q06185, Q08460, Q9CWS0, O08709, P99029, P16858, O55042, O08553, P23927, P62073, Q9D3D9, Q91ZZ3, Q9DCX2, P56382, P56480, P08249, Q9DB77, P62897, Q8R404, P97450, Q9CWZ7, Q60932, Q9D855, P70296, P12787, Q64433, P52503, P31786, Q04447, P05064, P56393, Q9D6M3, P43024, P56391, O35658	126	1721	19662	3.26422	8.29069e-08	1.65814e-08	1.41175e-08
GOTERM_CC_DIRECT	GO:0008021~synaptic vesicle	12	9.44882	4.80951e-10	O88935, P60879, P39053, Q61548, Q60932, P70296, Q9CR51, Q64332, Q8K021, O55042, P31786, Q8BLE7	126	126	19662	14.8617	1.19757e-07	1.99595e-08	1.69936e-08
GOTERM_CC_DIRECT	GO:0045202~synapse	19	14.9606	3.31886e-09	Q9R171, Q61644, P97441, P60879, Q62418, Q61361, Q64332, Q8BME9, P63040, Q62420, O55042, Q9QYX7, Q8BLE7, P23927, O88935, P39053, Q91ZZ3, P60761, Q8K021	126	505	19662	5.8711	8.26397e-07	1.18057e-07	1.00514e-07
GOTERM_CC_DIRECT	GO:0005753~mitochondrial proton-transporting ATP synthase complex	6	4.72441	7.68364e-08	P97450, Q06185, Q9D3D9, Q9DCX2, P56382, P56480	126	18	19662	52.0159	1.91321e-05	2.39153e-06	2.03616e-06
GOTERM_CC_DIRECT	GO:0043005~neuron projection	15	11.811	4.71452e-07	Q61644, P97441, P60879, P06745, P10637, P70296, Q0VGU4, Q9QYX7, Q8BLE7, O08553, Q68FL4, P17183, P08551, P20357, P06797	126	420	19662	5.57313	0.000117385	1.30435e-05	1.11053e-05
GOTERM_CC_DIRECT	GO:0030425~dendrite	16	12.5984	5.27386e-07	O89086, Q08460, P14869, P10637, Q62418, Q61361, Q64387, P63040, Q8BGD9, Q9QYX7, O08553, O88935, P09240, P21661, P60761, P20357	126	490	19662	5.09543	0.000131311	1.31319e-05	1.11806e-05
GOTERM_CC_DIRECT	GO:0043025~neuronal cell body	16	12.5984	1.54307e-06	Q08460, P60879, P70296, Q0VGU4, Q64387, P63040, Q8BGD9, Q9QYX7, O08553, P09240, P04370, Q91ZZ3, P17183, P21661, P60761, P20357	126	534	19662	4.67558	0.00038415	3.49294e-05	2.97391e-05
GOTERM_CC_DIRECT	GO:0005737~cytoplasm	68	53.5433	3.64668e-06	O08709, P10637, P34884, P16858, P18760, Q7TSJ2, P20917, Q61792, O08553, Q9JM76, O88456, P61982, P20357, Q61644, P06745, P70296, Q62418, Q9WUK2, Q64433, Q7TMM9, Q9CQC6, Q8VHQ9, P39053, Q9DC07, Q68FL4, P04370, P05064, Q91VW3, P06797, P26883, Q08460, Q4VAA2, P97441, P60879, P07724, P99029, Q9EQU5, Q62420, O55042, P70445, P23927, Q8CFE4, P61089, Q7TQD2, Q91ZZ3, Q6ZWY9, Q6ZWY8, Q9DCX2, P62774, P63028,…	126	6631	19662	1.60025	0.000907614	7.56687e-05	6.44247e-05
GOTERM_CC_DIRECT	GO:0005829~cytosol	28	22.0472	1.67595e-05	P26883, P60879, O08709, P99029, P10637, Q9EQU5, P16858, P18760, O55042, P17751, O08553, P23927, O88935, O88456, P61982, P62774, P62897, Q61644, Q9CQV8, P06745, Q62418, Q9CR51, P63040, Q60692, P17742, Q8VHQ9, Q68FL4, O35658	126	1784	19662	2.44918	0.00416446	0.000321009	0.000273309
GOTERM_CC_DIRECT	GO:0030424~axon	12	9.44882	2.46833e-05	O08553, P23927, O88935, P60879, Q9D3A9, P10637, P09240, P08551, P60761, P62774, O55042, Q9QYX7	126	370	19662	5.061	0.00612737	0.000439011	0.000373776
GOTERM_CC_DIRECT	GO:0016020~membrane	68	53.5433	2.77347e-05	Q06185, O08709, P10637, Q9ER00, P16858, P18760, Q6PE13, P20917, Q6P5F7, Q8BLE7, O08553, Q9JM76, P62073, O88456, P26339, P61982, P56480, P08249, Q9DB77, Q61644, P06745, P97797, Q62418, P12787, Q9WUK2, Q64433, P70699, Q9CQC6, P63213, Q9D3A9, Q9JM63, P04370, P01942, P05064, P43024, Q8K021, Q9DCU2, Q9Z1P6, Q9R171, Q61016, P26883, Q08460, P97441, P60879, Q62420, O55042, Q9WTR6, Q8CFE4, Q9D3D9, P21661,…	126	6998	19662	1.51632	0.00688224	0.000460396	0.000391984
GOTERM_CC_DIRECT	GO:0005615~extracellular space	24	18.8976	6.80439e-05	P07724, P06745, O08709, P99029, P70296, Q9QXV0, P34884, Q61361, Q0VGU4, Q8BME9, P18760, P17751, O55042, P31786, P17742, P09240, P26339, P17183, P21661, Q6ZWY9, P05064, P63028, O35658, P06797	126	1504	19662	2.49012	0.0168008	0.00104131	0.000886576
GOTERM_CC_DIRECT	GO:0030426~growth cone	8	6.29921	7.10933e-05	O08553, P60879, Q9JM76, P10637, Q91ZZ3, P08551, O55042, Q9QYX7	126	159	19662	7.85145	0.0175471	0.00104131	0.000886576
GOTERM_CC_DIRECT	GO:0014069~postsynaptic density	9	7.08661	0.000146954	P23927, O88935, Q61548, Q62418, P10637, Q64332, P60761, P20357, Q9QYX7	126	239	19662	5.87627	0.0359327	0.00203286	0.00173079
GOTERM_CC_DIRECT	GO:0043679~axon terminus	6	4.72441	0.000221171	P26883, Q61644, P70296, Q91ZZ3, Q64387, O55042	126	86	19662	10.887	0.0535885	0.00289851	0.00246781
GOTERM_CC_DIRECT	GO:0045298~tubulin complex	3	2.3622	0.000238572	P10637, P68372, P63028	126	4	19662	117.036	0.0576812	0.00291912	0.00248535
GOTERM_CC_DIRECT	GO:0005874~microtubule	10	7.87402	0.00024619	O08553, P68369, P39053, P10637, Q7TQD2, Q7TSJ2, P68372, Q7TMM9, P20357, P80317	126	327	19662	4.7721	0.0594674	0.00291912	0.00248535
GOTERM_CC_DIRECT	GO:0031201~SNARE complex	5	3.93701	0.000264353	Q9CWZ7, P60879, Q9ER00, Q64332, P63040	126	49	19662	15.9232	0.0637124	0.00299199	0.0025474
GOTERM_CC_DIRECT	GO:0045261~proton-transporting ATP synthase complex, catalytic core F(1)	3	2.3622	0.000395964	Q9D3D9, P56382, P56480	126	5	19662	93.6286	0.0939081	0.00410812	0.00349768
GOTERM_CC_DIRECT	GO:0000275~mitochondrial proton-transporting ATP synthase complex, catalytic core F(1)	3	2.3622	0.000395964	Q9D3D9, P56382, P56480	126	5	19662	93.6286	0.0939081	0.00410812	0.00349768
GOTERM_CC_DIRECT	GO:0048471~perinuclear region of cytoplasm	14	11.0236	0.000466582	Q61644, Q08460, Q9CQV8, P60879, P99029, Q9EQU5, Q9WUK2, Q7TSJ2, O55042, Q9QYX7, Q8CFE4, Q7TQD2, P26339, P62774	126	692	19662	3.15703	0.109708	0.00464716	0.00395662
GOTERM_CC_DIRECT	GO:0070469~respiratory chain	5	3.93701	0.000506537	Q9Z1P6, Q9D855, Q9DB77, P52503, P62897	126	58	19662	13.4524	0.118526	0.00485107	0.00413023
GOTERM_CC_DIRECT	GO:0030672~synaptic vesicle membrane	5	3.93701	0.000613971	O88935, P97441, Q64332, Q8K021, Q8BLE7	126	61	19662	12.7908	0.141807	0.00566218	0.00482081
GOTERM_CC_DIRECT	GO:0005913~cell-cell adherens junction	9	7.08661	0.0009423	Q9CQC6, Q9CQV8, O08709, P62827, Q62418, Q9WUK2, P05064, Q60692, Q61792	126	316	19662	4.44439	0.209226	0.00837974	0.00713456
GOTERM_CC_DIRECT	GO:0030054~cell junction	13	10.2362	0.00209165	Q9R171, Q61644, P97441, P60879, Q62418, Q64332, Q8BME9, O55042, Q9QYX7, Q8BLE7, O88935, P60761, Q8K021	126	718	19662	2.82537	0.406291	0.0179593	0.0152907
GOTERM_CC_DIRECT	GO:0043234~protein complex	12	9.44882	0.0022348	O08553, Q08460, Q9CQV8, P07724, P61089, P39053, P62827, Q60932, Q9EQU5, P05064, P63040, P20357	126	628	19662	2.9818	0.427125	0.0185488	0.0157926
GOTERM_CC_DIRECT	GO:0000276~mitochondrial proton-transporting ATP synthase complex, coupling factor F(o)	3	2.3622	0.00253823	P97450, Q06185, Q9DCX2	126	12	19662	39.0119	0.468909	0.0197506	0.0168157
GOTERM_CC_DIRECT	GO:0045263~proton-transporting ATP synthase complex, coupling factor F(o)	3	2.3622	0.00253823	P97450, Q06185, Q9DCX2	126	12	19662	39.0119	0.468909	0.0197506	0.0168157
GOTERM_CC_DIRECT	GO:0031012~extracellular matrix	8	6.29921	0.00276679	Q9DCT8, P26883, P62827, P16858, P18760, P68372, P56480, P80317	126	294	19662	4.24619	0.498366	0.0208767	0.0177745
GOTERM_CC_DIRECT	GO:0031982~vesicle	6	4.72441	0.0039877	P60879, P16858, Q9ER00, P34884, P18760, P61982	126	164	19662	5.70906	0.630248	0.029204	0.0248645
GOTERM_CC_DIRECT	GO:0030141~secretory granule	5	3.93701	0.00570143	P16014, Q9QXV0, P26339, P21661, P06797	126	112	19662	6.96641	0.759183	0.0405616	0.0345344
GOTERM_CC_DIRECT	GO:0030018~Z disc	5	3.93701	0.00812631	P23927, P26883, Q9CQ19, Q9DC07, P05064	126	124	19662	6.29224	0.86889	0.0554711	0.0472284
GOTERM_CC_DIRECT	GO:0031410~cytoplasmic vesicle	11	8.66142	0.00824269	Q61644, P97441, Q8CFE4, O08709, P99029, Q62418, P26339, P21661, Q0VGU4, P06797, Q8BLE7	126	646	19662	2.65716	0.872665	0.0554711	0.0472284
GOTERM_CC_DIRECT	GO:0005794~Golgi apparatus	16	12.5984	0.00856253	P07724, P70296, Q62418, Q9QXV0, Q9ER00, Q7TSJ2, Q60692, O55042, P31786, P23927, O88935, Q8CFE4, P39053, Q91ZZ3, Q60738, Q8K021	126	1190	19662	2.09812	0.882492	0.0561071	0.0477699
GOTERM_CC_DIRECT	GO:0005791~rough endoplasmic reticulum	4	3.14961	0.00968717	P70296, O55042, Q9WTR6, P20357	126	69	19662	9.04624	0.911421	0.0618489	0.0526585
GOTERM_CC_DIRECT	GO:0005856~cytoskeleton	15	11.811	0.011197	P10637, Q62418, Q7TSJ2, P18760, P68372, Q61792, Q7TMM9, O55042, Q9WTR6, O08553, P68369, Q9JM76, P39053, Q7TQD2, P20357	126	1113	19662	2.10307	0.93942	0.0697015	0.0593443
GOTERM_CC_DIRECT	GO:0036464~cytoplasmic ribonucleoprotein granule	3	2.3622	0.0136046	P68369, P14869, P10637	126	28	19662	16.7194	0.966985	0.0826229	0.0703456
GOTERM_CC_DIRECT	GO:0043204~perikaryon	5	3.93701	0.015484	P23927, P09240, P21661, P17183, P06797	126	150	19662	5.20159	0.979466	0.0917979	0.0781573
GOTERM_CC_DIRECT	GO:0030027~lamellipodium	5	3.93701	0.0207602	P60879, Q9JM76, Q62418, P18760, Q91VW3	126	164	19662	4.75755	0.994613	0.117484	0.100026
GOTERM_CC_DIRECT	GO:0005802~trans-Golgi network	5	3.93701	0.0207602	Q61644, P60879, Q9QXV0, Q8K021, Q9QYX7	126	164	19662	4.75755	0.994613	0.117484	0.100026
GOTERM_CC_DIRECT	GO:0070032~synaptobrevin 2-SNAP-25-syntaxin-1a-complexin I complex	2	1.5748	0.0251902	P60879, P63040	126	4	19662	78.0238	0.998258	0.136356	0.116094
GOTERM_CC_DIRECT	GO:0043218~compact myelin	2	1.5748	0.0251902	P04370, Q9DCU2	126	4	19662	78.0238	0.998258	0.136356	0.116094
GOTERM_CC_DIRECT	GO:0016281~eukaryotic translation initiation factor 4F complex	2	1.5748	0.0313887	Q9WUK2, Q8BGD9	126	5	19662	62.419	0.999644	0.166294	0.141583
GOTERM_CC_DIRECT	GO:0005925~focal adhesion	7	5.51181	0.0389019	Q9CQV8, Q9JM76, P14869, P18760, P61982, Q61792, P17742	126	391	19662	2.79369	0.999949	0.201804	0.171817
GOTERM_CC_DIRECT	GO:0030659~cytoplasmic vesicle membrane	4	3.14961	0.0411877	Q61644, Q9CQV8, P61982, O55042	126	120	19662	5.20159	0.999972	0.209301	0.1782
GOTERM_CC_DIRECT	GO:0030136~clathrin-coated vesicle	3	2.3622	0.05424	Q8CFE4, Q61548, Q8K021	126	59	19662	7.93462	0.999999	0.270115	0.229978
GOTERM_CC_DIRECT	GO:0005750~mitochondrial respiratory chain complex III	2	1.5748	0.0617999	Q9D855, Q9DB77	126	10	19662	31.2095	1	0.301729	0.256894
GOTERM_CC_DIRECT	GO:0043229~intracellular organelle	2	1.5748	0.0795899	O88935, P60879	126	13	19662	24.0073	1	0.367928	0.313256
GOTERM_CC_DIRECT	GO:0005833~hemoglobin complex	2	1.5748	0.0795899	P02088, P01942	126	13	19662	24.0073	1	0.367928	0.313256
GOTERM_CC_DIRECT	GO:0015630~microtubule cytoskeleton	4	3.14961	0.0797915	P23927, P10637, A2AG50, P16858	126	158	19662	3.95057	1	0.367928	0.313256
GOTERM_CC_DIRECT	GO:0016471~vacuolar proton-transporting V-type ATPase complex	2	1.5748	0.0854452	Q9WTT4, Q9CR51	126	14	19662	22.2925	1	0.386834	0.329353
GOTERM_CC_DIRECT	GO:0031083~BLOC-1 complex	2	1.5748	0.0912636	P60879, Q9ER00	126	15	19662	20.8063	1	0.398678	0.339437
GOTERM_CC_DIRECT	GO:0005751~mitochondrial respiratory chain complex IV	2	1.5748	0.0912636	P12787, P43024	126	15	19662	20.8063	1	0.398678	0.339437

## Sheet: MF enrichment
Category	Term	Count	%	PValue	Genes	List Total	Pop Hits	Pop Total	Fold Enrichment	Bonferroni	Benjamini	FDR
GOTERM_MF_DIRECT	GO:0008017~microtubule binding	10	7.87402	9.31672e-06	O08553, P23927, P39053, P10637, Q7TQD2, P16858, Q7TSJ2, P63028, O55042, P20357	120	200	17446	7.26917	0.00241013	0.00241303	0.0022826
GOTERM_MF_DIRECT	GO:0046933~proton-transporting ATP synthase activity, rotational mechanism	4	3.14961	0.000106623	Q9D3D9, Q9DCX2, P56382, P56480	120	14	17446	41.5381	0.027239	0.0110883	0.010489
GOTERM_MF_DIRECT	GO:0019904~protein domain specific binding	10	7.87402	0.000163441	P68369, Q9CQV8, P60879, P62827, Q62418, P10637, P61982, Q8K021, P08551, O55042	120	289	17446	5.03057	0.0414512	0.0110883	0.010489
GOTERM_MF_DIRECT	GO:0032403~protein complex binding	11	8.66142	0.000171248	Q08460, Q9CQV8, P39053, P62827, Q60932, P10637, Q9D3D9, P21661, P34884, Q9DB77, P06797	120	358	17446	4.46709	0.0433878	0.0110883	0.010489
GOTERM_MF_DIRECT	GO:0016887~ATPase activity	8	6.29921	0.000444444	P97450, Q06185, Q9WTT4, Q9D3D9, Q9CR51, Q9DCX2, P56382, P56480	120	200	17446	5.81533	0.108756	0.0230222	0.0217777
GOTERM_MF_DIRECT	GO:0098641~cadherin binding involved in cell-cell adhesion	9	7.08661	0.000656271	Q9CQC6, Q9CQV8, O08709, P62827, Q62418, Q9WUK2, P05064, Q60692, Q61792	120	279	17446	4.68978	0.15636	0.028329	0.0267977
GOTERM_MF_DIRECT	GO:0004129~cytochrome-c oxidase activity	4	3.14961	0.000895051	P12787, P43024, P56393, P56391	120	28	17446	20.769	0.206992	0.0331169	0.0313268
GOTERM_MF_DIRECT	GO:0015078~hydrogen ion transmembrane transporter activity	4	3.14961	0.00132852	P97450, Q06185, Q9D3D9, Q9DCX2	120	32	17446	18.1729	0.291294	0.0430108	0.0406859
GOTERM_MF_DIRECT	GO:0005200~structural constituent of cytoskeleton	5	3.93701	0.00198997	P68369, Q9JM76, P68372, P08551, Q7TMM9	120	78	17446	9.31944	0.403047	0.057267	0.0541715
GOTERM_MF_DIRECT	GO:0008553~hydrogen-exporting ATPase activity, phosphorylative mechanism	3	2.3622	0.00397938	Q9WTT4, Q9CR51, P56382	120	14	17446	31.1536	0.643961	0.103066	0.0974948
GOTERM_MF_DIRECT	GO:0005515~protein binding	41	32.2835	0.00747846	Q9R171, Q9WTT4, P26883, Q08460, P60879, P10637, Q9ER00, Q8BME9, P20917, Q61792, Q62420, P70445, Q9QYX7, Q9DCT8, O08553, P23927, O88935, Q8CFE4, P61089, P61982, P56480, P20357, Q61644, Q9CQV8, Q61548, P62827, Q60932, Q62418, P97797, Q9CR51, Q64332, P17742, P16014, P39053, Q9JM63, P09240, Q04447, Q8K021, P08551, P06797, P80317	120	4092	17446	1.45668	0.856898	0.171748	0.162465
GOTERM_MF_DIRECT	GO:0016853~isomerase activity	5	3.93701	0.00795745	P26883, P06745, P34884, P17751, P17742	120	115	17446	6.32101	0.873716	0.171748	0.162465
GOTERM_MF_DIRECT	GO:0044822~poly(A) RNA binding	16	12.5984	0.0087019	O89086, P62827, P14869, P70296, Q9WUK2, Q64433, Q8BGD9, P17742, Q9CQC6, P61089, P39053, P05064, P61982, P08249, P63028, P80317	120	1113	17446	2.08997	0.89603	0.173369	0.163997
GOTERM_MF_DIRECT	GO:0008092~cytoskeletal protein binding	4	3.14961	0.0112403	P23927, Q61644, Q9DC07, P05064	120	68	17446	8.55196	0.946481	0.199341	0.188566
GOTERM_MF_DIRECT	GO:0046961~proton-transporting ATPase activity, rotational mechanism	3	2.3622	0.0115449	Q9D3D9, P56382, P56480	120	24	17446	18.1729	0.950586	0.199341	0.188566
GOTERM_MF_DIRECT	GO:0019825~oxygen binding	3	2.3622	0.0134746	P02088, P07724, P01942	120	26	17446	16.775	0.970212	0.199492	0.188708
GOTERM_MF_DIRECT	GO:0034057~RNA strand-exchange activity	2	1.5748	0.013596	Q9WUK2, Q8BGD9	120	2	17446	145.383	0.971146	0.199492	0.188708
GOTERM_MF_DIRECT	GO:0003924~GTPase activity	6	4.72441	0.0142981	P68369, P63213, P39053, P62827, P68372, Q7TMM9	120	209	17446	4.17368	0.976006	0.199492	0.188708
GOTERM_MF_DIRECT	GO:0051082~unfolded protein binding	4	3.14961	0.0146345	P23927, Q9CWM4, Q64433, P80317	120	75	17446	7.75378	0.978036	0.199492	0.188708
GOTERM_MF_DIRECT	GO:0005184~neuropeptide hormone activity	3	2.3622	0.016611	P09240, Q0VGU4, Q64387	120	29	17446	15.0397	0.986943	0.215113	0.203485
GOTERM_MF_DIRECT	GO:0004601~peroxidase activity	3	2.3622	0.0188577	O08709, P99029, P01942	120	31	17446	14.0694	0.992779	0.232578	0.220006
GOTERM_MF_DIRECT	GO:0030984~kininogen binding	2	1.5748	0.0270086	O35658, P06797	120	4	17446	72.6917	0.999168	0.302763	0.286398
GOTERM_MF_DIRECT	GO:0033592~RNA strand annealing activity	2	1.5748	0.0270086	Q9WUK2, Q8BGD9	120	4	17446	72.6917	0.999168	0.302763	0.286398
GOTERM_MF_DIRECT	GO:0003779~actin binding	7	5.51181	0.0283703	Q08460, Q9JM76, Q9DC07, Q62418, P18760, P61982, Q61792	120	338	17446	3.0109	0.999421	0.302763	0.286398
GOTERM_MF_DIRECT	GO:0019901~protein kinase binding	8	6.29921	0.0292243	O08553, O88935, P39053, Q61548, Q60932, P10637, P70296, P20917	120	434	17446	2.67988	0.999539	0.302763	0.286398
GOTERM_MF_DIRECT	GO:0008289~lipid binding	6	4.72441	0.0376678	Q61644, P07724, Q8VHQ9, P70296, Q62420, P31786	120	270	17446	3.23074	0.999952	0.375229	0.354947
GOTERM_MF_DIRECT	GO:0015631~tubulin binding	3	2.3622	0.0408623	P10637, Q7TQD2, P20357	120	47	17446	9.27979	0.99998	0.381067	0.360469
GOTERM_MF_DIRECT	GO:0046983~protein dimerization activity	5	3.93701	0.0411965	O88935, P39053, P99029, Q64332, P31786	120	190	17446	3.82588	0.999981	0.381067	0.360469
GOTERM_MF_DIRECT	GO:0003824~catalytic activity	8	6.29921	0.0458015	O88935, O08709, Q04447, Q64332, P70699, P17751, P08249, Q9DB77	120	479	17446	2.42811	0.999995	0.400097	0.37847
GOTERM_MF_DIRECT	GO:0016820~hydrolase activity, acting on acid anhydrides, catalyzing transmembrane movement of substances	2	1.5748	0.0467892	Q9WTT4, Q9CR51	120	7	17446	41.5381	0.999996	0.400097	0.37847
GOTERM_MF_DIRECT	GO:0019899~enzyme binding	7	5.51181	0.0478881	P26883, Q9CQV8, P07724, P10637, P70296, P16858, O55042	120	384	17446	2.65022	0.999997	0.400097	0.37847
GOTERM_MF_DIRECT	GO:0051015~actin filament binding	4	3.14961	0.0616076	Q9JM76, Q62418, P18760, Q61792	120	132	17446	4.40556	1	0.498637	0.471683
GOTERM_MF_DIRECT	GO:0051920~peroxiredoxin activity	2	1.5748	0.066171	O08709, P99029	120	10	17446	29.0767	1	0.519342	0.491269
GOTERM_MF_DIRECT	GO:0000149~SNARE binding	3	2.3622	0.0707685	P60879, Q9ER00, P63040	120	64	17446	6.81484	1	0.536828	0.50781
GOTERM_MF_DIRECT	GO:0005313~L-glutamate transmembrane transporter activity	2	1.5748	0.0725443	Q9D6M3, Q8BLE7	120	11	17446	26.4333	1	0.536828	0.50781
GOTERM_MF_DIRECT	GO:0048306~calcium-dependent protein binding	3	2.3622	0.0805901	O88935, P60879, Q64332	120	69	17446	6.32101	1	0.579801	0.54846
GOTERM_MF_DIRECT	GO:0044183~protein binding involved in protein folding	2	1.5748	0.0851619	Q9CWM4, P80317	120	13	17446	22.3667	1	0.580445	0.54907
GOTERM_MF_DIRECT	GO:0043024~ribosomal small subunit binding	2	1.5748	0.0851619	Q9WUK2, Q8BGD9	120	13	17446	22.3667	1	0.580445	0.54907
GOTERM_MF_DIRECT	GO:0051087~chaperone binding	3	2.3622	0.0928918	P07724, P62073, Q64433	120	75	17446	5.81533	1	0.616897	0.583551

## Sheet: KEGG enrichment
Category	Term	Count	%	PValue	Genes	List Total	Pop Hits	Pop Total	Fold Enrichment	Bonferroni	Benjamini	FDR
KEGG_PATHWAY	mmu00190:Oxidative phosphorylation	16	12.5984	6.55456e-13	Q9Z1P6, P97450, Q06185, Q9WTT4, Q9D855, Q9CR51, P12787, P52503, Q9D3D9, Q9DCX2, P56382, P43024, P56393, P56480, P56391, Q9DB77	69	139	7691	12.8304	6.68585e-11	6.24672e-11	5.75678e-11
KEGG_PATHWAY	mmu05010:Alzheimer's disease	17	13.3858	1.62735e-12	Q9Z1P6, P97450, P10637, Q9D855, P12787, P16858, O55042, P52503, Q9D3D9, Q9DCX2, P56382, P43024, P56393, P56480, P56391, Q9DB77, P62897	69	177	7691	10.7056	1.65991e-10	6.24672e-11	5.75678e-11
KEGG_PATHWAY	mmu05012:Parkinson's disease	16	12.5984	1.83727e-12	Q9Z1P6, P97450, Q60932, Q9D855, P12787, O55042, P52503, Q9D3D9, Q9DCX2, P56382, P43024, P56393, P56480, P56391, Q9DB77, P62897	69	149	7691	11.9693	1.87405e-10	6.24672e-11	5.75678e-11
KEGG_PATHWAY	mmu05016:Huntington's disease	15	11.811	1.2893e-09	Q9Z1P6, P97450, Q60932, Q9D855, P12787, P52503, Q9D3D9, Q9DCX2, P56382, P43024, P56393, P56480, P56391, Q9DB77, P62897	69	198	7691	8.44422	1.31508e-07	3.2877e-08	3.02984e-08
KEGG_PATHWAY	mmu01100:Metabolic pathways	26	20.4724	4.1727e-05	Q9Z1P6, Q06185, Q9WTT4, O08709, P16858, P17751, Q9D3D9, Q9DCX2, P56382, P56480, P08249, Q9DB77, P97450, P06745, Q9D855, Q9CR51, P12787, P70699, P52503, Q68FL4, Q04447, P05064, P17183, P56393, P43024, P56391	69	1269	7691	2.28373	0.0042472	0.000851231	0.000784468
KEGG_PATHWAY	mmu04932:Non-alcoholic fatty liver disease (NAFLD)	9	7.08661	6.5982e-05	Q9Z1P6, Q9D855, P12787, P43024, P56393, P56391, Q9DB77, P52503, P62897	69	157	7691	6.38964	0.00670779	0.00112169	0.00103372
KEGG_PATHWAY	mmu04721:Synaptic vesicle cycle	6	4.72441	0.000203991	Q9WTT4, P60879, P39053, Q9CR51, P63040, Q8BLE7	69	62	7691	10.7868	0.0205942	0.00297244	0.00273931
KEGG_PATHWAY	mmu04260:Cardiac muscle contraction	6	4.72441	0.00056235	Q9D855, P12787, P43024, P56393, P56391, Q9DB77	69	77	7691	8.68549	0.0557608	0.00716996	0.00660761
KEGG_PATHWAY	mmu00010:Glycolysis / Gluconeogenesis	5	3.93701	0.00266853	P06745, P16858, P05064, P17183, P17751	69	66	7691	8.44422	0.238568	0.0302434	0.0278714
KEGG_PATHWAY	mmu01200:Carbon metabolism	6	4.72441	0.003503	P06745, P16858, P05064, P17183, P17751, P08249	69	116	7691	5.76537	0.30088	0.0357306	0.0329282
KEGG_PATHWAY	mmu04145:Phagosome	7	5.51181	0.00387503	Q9WTT4, P68369, Q9CR51, Q9ER00, P68372, Q7TMM9, P06797	69	171	7691	4.56284	0.327007	0.0359321	0.0331139
KEGG_PATHWAY	mmu01230:Biosynthesis of amino acids	4	3.14961	0.0293841	P16858, P05064, P17183, P17751	69	76	7691	5.86651	0.952265	0.249765	0.230175
KEGG_PATHWAY	mmu01130:Biosynthesis of antibiotics	6	4.72441	0.040317	P06745, P16858, P05064, P17183, P17751, P08249	69	214	7691	3.12515	0.984967	0.316333	0.291523
