# Supplementary material for: Identification of potential functional peptides involved in demyelinating injury in the central nervous system
Source: PeerJ journal article supplement (doi:10.7717/peerj.15846), 2023-08-21
Supplement: Supplemental_Files_1.zip [file Supplemental_Files_1.zip]

## Sheet: differential expressed peptides
mainID	Sequence	Intensity_nor con_2	Intensity_nor con_5	Intensity_nor con_6	Intensity_nor cp4_4	Intensity_nor cp4_5	Intensity_nor cp4_6	Ratio	LogRatio	p Value	LogP	Sig	Entry	Entry name	Protein names	Gene names	N-term cleavage window	C-term cleavage window	Amino acid before	First amino acid	Second amino acid	Second last amino acid	Last amino acid	Amino acid after	A Count	R Count	N Count	D Count	C Count	Q Count	E Count	G Count	H Count	I Count	L Count	K Count	M Count	F Count	P Count	S Count	T Count	W Count	Y Count	V Count	U Count	O Count	Length	Missed cleavages	Mass
pep6296	VGSKTKEGVVHGVTTV	0.0120409	0.00452024	0.0606438	0.267124	0.287794	0.611806	15.112	3.91763	0.0324552	1.48872	1	O55042	SYUA_MOUSE	Alpha-synuclein (Non-A beta component of AD amyloid) (Non-A4 component of amyloid precursor) (NACP)	Snca Syn	GVAEAAGKTKEGVLYVGSKTKEGVVHGVTT	GSKTKEGVVHGVTTVAEKTKEQVTNVGGAV	Y	V	G	T	V	A	0	0	0	0	0	0	1	3	1	0	0	2	0	0	0	1	3	0	0	5	0	0	16		1596.88
pep2965	LENPKKYIPGTK	0.00515243	0.00967128	0.0362978	0.164524	0.0832527	0.168396	8.14086	3.02518	0.0144054	1.84147	1	P62897	CYC_MOUSE	Cytochrome c, somatic	Cycs	KNKGITWGEDTLMEYLENPKKYIPGTKMIF	MEYLENPKKYIPGTKMIFAGIKKKGERADL	Y	L	E	T	K	M	0	0	1	0	0	0	1	1	0	1	1	3	0	0	2	0	1	0	1	0	0	0	12		1386.79
pep4013	PHLRIRTKPFPWGDGNHTL	0.0321483	0.0120687	0.00905912	0.0768737	0.201662	0.143602	7.92358	2.98615	0.0287403	1.54151	1	P43024	CX6A1_MOUSE	Cytochrome c oxidase subunit 6A1, mitochondrial (Cytochrome c oxidase polypeptide VIa-liver)	Cox6a1 Cox6al	KSRHEEHERPPFVAYPHLRIRTKPFPWGDG	IRTKPFPWGDGNHTLFHNPHVNPLPTGYED	Y	P	H	T	L	F	0	2	1	1	0	0	0	2	2	1	2	1	0	1	3	0	2	1	0	0	0	0	19		2241.19
pep120	AASVDLELKKAFTELQAKV	0.00481449	0.00903695	0.00678341	0.0551343	0.0235542	0.0684258	7.12941	2.83378	0.0343488	1.46409	1	Q9CWM4	PFD1_MOUSE	Prefoldin subunit 1	Pfdn1	______________________________	DLELKKAFTELQAKVIDTQQKVKLADIQIE	M	A	A	K	V	I	4	0	0	1	0	1	2	0	0	0	3	3	0	1	0	1	1	0	0	2	0	0	19		2060.15
pep82	AAQKINEGLEHLAKAEKYLKTGFL	0.0146562	0.0275102	0.02065	0.0652932	0.189826	0.18083	6.94004	2.79494	0.0366174	1.43631	1	Q9CWZ7	SNAG_MOUSE	Gamma-soluble NSF attachment protein (SNAP-gamma) (N-ethylmaleimide-sensitive factor attachment protein gamma)	Napg Snapg	______________________________	EHLAKAEKYLKTGFLKWKPDYDSAASEYGK	M	A	A	F	L	K	4	0	1	0	0	1	3	2	1	1	4	4	0	1	0	0	1	0	1	0	0	0	24		2671.47
pep1160	AWGKIGGHGAEYGAEALE	0.00333539	0.00626063	0.0234971	0.089708	0.0943702	0.0443312	6.90202	2.78702	0.0191813	1.71712	1	P01942	HBA_MOUSE	Hemoglobin subunit alpha (Alpha-globin) (Hemoglobin alpha chain)	Hba Hba-a1	______________________________	KIGGHGAEYGAEALERMFASFPTTKTYFPH	A	A	W	L	E	R	4	0	0	0	0	0	3	5	1	1	1	1	0	0	0	0	0	1	1	0	0	0	18		1814.86
pep2433	IEGRAPVISGVTKA	0.00751116	0.0140987	0.0105829	0.0887235	0.0367474	0.0918062	6.74925	2.75473	0.0264227	1.57802	1	Q7TQD2	TPPP_MOUSE	Tubulin polymerization-promoting protein (TPPP) (EC 3.6.5.-) (25 kDa brain-specific protein) (TPPP/p25) (p25-alpha)	Tppp	KDKSSEEAVREVHRLIEGRAPVISGVTKAV	LIEGRAPVISGVTKAVSSPTVSRLTDTSKF	L	I	E	K	A	V	2	1	0	0	0	0	1	2	0	2	0	1	0	0	1	1	1	0	0	2	0	0	14		1396.8
pep5966	TNPEHASDAMRAMNGESL	0.00486711	0.00913573	0.00685756	0.0216829	0.0487754	0.0675977	6.61809	2.72641	0.043285	1.36366	1	O89086	RBM3_MOUSE	RNA-binding protein 3 (RNA-binding motif protein 3)	Rbm3	DRETQRSRGFGFITFTNPEHASDAMRAMNG	EHASDAMRAMNGESLDGRQIRVDHAGKSAR	F	T	N	S	L	D	3	1	2	1	0	0	2	1	1	0	1	0	2	0	1	2	1	0	0	0	0	0	18		1929.83
pep4566	RLLLPGELAKHAVSEGTKAVTK	0.00440113	0.00826107	0.00620101	0.0461763	0.021532	0.0489978	6.18697	2.62923	0.0206785	1.68448	1	Q6ZWY9	H2B1C_MOUSE	Histone H2B type 1-C/E/G	H2bc4 Hist1h2bc; H2bc6 Hist1h2be; H2bc8 Hist1h2bg	NKRSTITSREIQTAVRLLLPGELAKHAVSE	LAKHAVSEGTKAVTKYTSSK__________	V	R	L	T	K	Y	3	1	0	0	0	0	2	2	1	0	4	3	0	0	1	1	2	0	0	2	0	0	22		2317.35
pep6240	VEVMPQNQKAIGNALKSWNET	0.0163925	0.0307693	0.0230964	0.155535	0.0801982	0.187761	6.02769	2.59161	0.021515	1.66726	1	Q9DCX2	ATP5H_MOUSE	ATP synthase subunit d, mitochondrial (ATPase subunit d) (ATP synthase peripheral stalk subunit d)	Atp5pd Atp5h	AGRKLALKTIDWVSFVEVMPQNQKAIGNAL	NQKAIGNALKSWNETFHARLASLSEKPPAI	F	V	E	E	T	F	2	0	3	0	0	2	2	1	0	1	1	2	1	0	1	1	1	1	0	2	0	0	21		2356.18
pep6640	YFNKPDIDAWELRKGMNTL	0.0424391	0.0159319	0.011959	0.120675	0.139752	0.155652	5.91608	2.56464	0.00116146	2.935	1	P12787	COX5A_MOUSE	Cytochrome c oxidase subunit 5A, mitochondrial (Cytochrome c oxidase polypeptide Va)	Cox5a	GSHETDEEFDARWVTYFNKPDIDAWELRKG	PDIDAWELRKGMNTLVGYDLVPEPKIIDAA	T	Y	F	T	L	V	1	1	2	2	0	0	1	1	0	1	2	2	1	1	1	0	1	1	1	0	0	0	19		2310.15
pep5922	TLPTKETIEQEKR	0.00235685	0.0221194	0.0033207	0.0795315	0.0532941	0.031126	5.89818	2.56027	0.0420761	1.37596	1	Q6ZWY8	TYB10_MOUSE	Thymosin beta-10	Tmsb10 Ptmb10	FDKAKLKKTETQEKNTLPTKETIEQEKRSE	KNTLPTKETIEQEKRSEIS___________	N	T	L	K	R	S	0	1	0	0	0	1	3	0	0	1	1	2	0	0	1	0	3	0	0	0	0	0	13		1571.85
pep449	AGRKLALKTIDWVSFVEV	0.0466237	0.0526841	0.0373946	0.231985	0.273399	0.287923	5.80317	2.53684	0.000226694	3.64456	1	Q9DCX2	ATP5H_MOUSE	ATP synthase subunit d, mitochondrial (ATPase subunit d) (ATP synthase peripheral stalk subunit d)	Atp5pd Atp5h	______________________________	KLALKTIDWVSFVEVMPQNQKAIGNALKSW	M	A	G	E	V	M	2	1	0	1	0	0	1	1	0	1	2	2	0	1	0	1	1	1	0	3	0	0	18		2031.15
pep858	ASATRVIQKLRNWASGQDLQAK	0.0635989	0.0238754	0.0179216	0.144652	0.191698	0.271207	5.76452	2.5272	0.0134221	1.87218	1	Q9Z1P6	NDUA7_MOUSE	NADH dehydrogenase [ubiquinone] 1 alpha subcomplex subunit 7 (Complex I-B14.5a) (CI-B14.5a) (NADH-ubiquinone oxidoreductase subunit B14.5a)	Ndufa7	______________________________	QKLRNWASGQDLQAKLQLRYQEIAKRTQPP	M	A	S	A	K	L	4	2	1	1	0	3	0	1	0	1	2	2	0	0	0	2	1	1	0	1	0	0	22		2440.33
pep954	ASQSQGIQQLLQAEKRAAEKV	0.0242018	0.0454275	0.0340993	0.25557	0.118404	0.214356	5.67182	2.50381	0.0170908	1.76724	1	Q9CR51	VATG1_MOUSE	V-type proton ATPase subunit G 1 (V-ATPase subunit G 1) (V-ATPase 13 kDa subunit 1) (Vacuolar proton pump subunit G 1)	Atp6v1g1 Atp6g1	______________________________	IQQLLQAEKRAAEKVSEARKRKNRRLKQAK	M	A	S	K	V	S	4	1	0	0	0	5	2	1	0	1	2	2	0	0	0	2	0	0	0	1	0	0	21		2282.23
pep6175	VATLGVEVHPL	0.00288418	0.00541369	0.00406368	0.0252259	0.0141104	0.0293061	5.5529	2.47324	0.0151086	1.82078	1	P62827	RAN_MOUSE	GTP-binding nuclear protein Ran (GTPase Ran) (Ras-like protein TC4) (Ras-related nuclear protein)	Ran Rasl2-8	TFVKRHLTGEFEKKYVATLGVEVHPLVFHT	EKKYVATLGVEVHPLVFHTNRGPIKFNVWD	Y	V	A	P	L	V	1	0	0	0	0	0	1	1	1	0	2	0	0	0	1	0	1	0	0	3	0	0	11		1133.64
pep2585	IYEKPQTEAPQVTGPIEVPVVRT	0.00271719	0.00510025	0.0038284	0.0271963	0.0132935	0.0239388	5.53233	2.46789	0.0144254	1.84087	1	Q9DCT8	CRIP2_MOUSE	Cysteine-rich protein 2 (CRP-2) (Heart LIM protein)	Crip2 Crp2 Hlp	LFGPKGVNIGGAGSYIYEKPQTEAPQVTGP	APQVTGPIEVPVVRTEERKTSGPPKGPSKA	Y	I	Y	R	T	E	1	1	0	0	0	2	3	1	0	2	0	1	0	0	4	0	3	0	1	4	0	0	23		2550.37
pep6401	VMPQNQKAIGNALKSWNETFHARLA	0.00545915	0.010247	0.00769171	0.0382483	0.0267082	0.0612905	5.39566	2.4318	0.0287898	1.54076	1	Q9DCX2	ATP5H_MOUSE	ATP synthase subunit d, mitochondrial (ATPase subunit d) (ATP synthase peripheral stalk subunit d)	Atp5pd Atp5h	RKLALKTIDWVSFVEVMPQNQKAIGNALKS	NALKSWNETFHARLASLSEKPPAIDWAYYR	E	V	M	L	A	S	4	1	3	0	0	2	1	1	1	1	2	2	1	1	1	1	1	1	0	1	0	0	25		2823.46
pep5638	SVPAGRRSPTSSPTPQR	0.00605753	0.0113702	0.0085348	0.0634654	0.0505257	0.0239903	5.31463	2.40997	0.0333401	1.47703	1	P39053	DYN1_MOUSE	Dynamin-1 (EC 3.6.5.5)	Dnm1 Dnm Kiaa4093	TPMPPPVDDSWLQVQSVPAGRRSPTSSPTP	PAGRRSPTSSPTPQRRAPAVPPARPGSRGP	Q	S	V	Q	R	R	1	3	0	0	0	1	0	1	0	0	0	0	0	0	4	4	2	0	0	1	0	0	17		1779.93
pep5134	SIPSTANRPNRPK	0.00389314	0.00730754	0.00548526	0.0348735	0.036726	0.0154184	5.21504	2.38268	0.0271602	1.56607	1	Q08460	KCMA1_MOUSE	Calcium-activated potassium channel subunit alpha-1 (BK channel) (BKCA alpha) (Calcium-activated potassium channel, subfamily M subunit alpha-1) (K(VCA)alpha) (KCa1.1) (Maxi K channel) (MaxiK) (Slo-alpha) (Slo1) (mSlo1) (Slowpoke homolog) (Slo homolog) (mSlo)	Kcnma1 Kcnma	SHSSQSSSKKSSSVHSIPSTANRPNRPKSR	VHSIPSTANRPNRPKSRESRDKQNRKEMVY	H	S	I	P	K	S	1	2	2	0	0	0	0	0	0	1	0	1	0	0	3	2	1	0	0	0	0	0	13		1436.78
pep3414	MESVKQRILAPGKEGIKNFAG	0.0176432	0.0331168	0.0248585	0.109611	0.0863169	0.196451	5.18892	2.37543	0.0354175	1.45078	1	Q8BLE7	VGLU2_MOUSE	Vesicular glutamate transporter 2 (VGluT2) (Differentiation-associated BNPI) (Differentiation-associated Na(+)-dependent inorganic phosphate cotransporter) (Solute carrier family 17 member 6)	Slc17a6 Dnpi Vglut2	______________________________	RILAPGKEGIKNFAGKSLGQIYRVLEKKQD	-	M	E	A	G	K	2	1	1	0	0	1	2	3	0	2	1	3	1	1	1	1	0	0	0	1	0	0	21		2272.24
pep3401	MEPSLATGGSETTRLVSARDR	0.00543884	0.0102089	0.00766309	0.0242299	0.0403439	0.0563294	5.18658	2.37478	0.0255268	1.593	1	P97441	ZNT3_MOUSE	Zinc transporter 3 (ZnT-3) (Solute carrier family 30 member 3)	Slc30a3 Znt3	______________________________	TGGSETTRLVSARDRSSAGGGLRLKSLFTE	-	M	E	D	R	S	2	3	0	1	0	0	2	2	0	0	2	0	1	0	1	3	3	0	0	1	0	0	21		2233.11
pep1462	ELRPTLNEL	0.00523062	0.00981804	0.00736972	0.0233023	0.0442183	0.0474554	5.12865	2.35858	0.0159321	1.79773	1	P12787	COX5A_MOUSE	Cytochrome c oxidase subunit 5A, mitochondrial (Cytochrome c oxidase polypeptide Va)	Cox5a	DKAGPHKEIYPYVIQELRPTLNELGISTPE	YPYVIQELRPTLNELGISTPEELGLDKV__	Q	E	L	E	L	G	0	1	1	0	0	0	2	0	0	0	3	0	0	0	1	0	1	0	0	0	0	0	9		1083.59
pep2735	KPFPWGDGNHT	0.00326126	0.00612149	0.00459498	0.0249941	0.0159553	0.0304596	5.10877	2.35298	0.0113113	1.94649	1	P43024	CX6A1_MOUSE	Cytochrome c oxidase subunit 6A1, mitochondrial (Cytochrome c oxidase polypeptide VIa-liver)	Cox6a1 Cox6al	ERPPFVAYPHLRIRTKPFPWGDGNHTLFHN	RIRTKPFPWGDGNHTLFHNPHVNPLPTGYE	T	K	P	H	T	L	0	0	1	1	0	0	0	2	1	0	0	1	0	1	2	0	1	1	0	0	0	0	11		1254.58
pep5208	SLGGGTGSGMGTLLISKI	0.00504005	0.00946033	0.00710121	0.0224533	0.0423313	0.0455243	5.10652	2.35234	0.0156774	1.80473	1	P68372	TBB4B_MOUSE	Tubulin beta-4B chain (Tubulin beta-2C chain)	Tubb4b Tubb2c	EAESCDCLQGFQLTHSLGGGTGSGMGTLLI	GGTGSGMGTLLISKIREEYPDRIMNTFSVV	H	S	L	K	I	R	0	0	0	0	0	0	0	6	0	2	3	1	1	0	0	3	2	0	0	0	0	0	18		1647.89
pep48	AAGHLDDLPGALSALSDLHAH	0.00668217	0.0125427	0.0094149	0.0297689	0.0546226	0.0573303	4.94843	2.30697	0.0134798	1.87032	1	P01942	HBA_MOUSE	Hemoglobin subunit alpha (Alpha-globin) (Hemoglobin alpha chain)	Hba Hba-a1	QVKGHGKKVADALASAAGHLDDLPGALSAL	DLPGALSALSDLHAHKLRVDPVNFKLLSHC	S	A	A	A	H	K	5	0	0	3	0	0	0	2	3	0	5	0	0	0	1	2	0	0	0	0	0	0	21		2080.03
pep2518	IPLDDPGANAAAAKIQASFRGHMA	0.00613602	0.0115175	0.00864539	0.0273358	0.0577935	0.0446923	4.93638	2.30345	0.0182617	1.73846	1	P60761	NEUG_MOUSE	Neurogranin (Ng) (RC3) [Cleaved into: NEUG(55-78)]	Nrgn	CTESACSKPDDDILDIPLDDPGANAAAAKI	AAAAKIQASFRGHMARKKIKSGECGRKGPG	D	I	P	M	A	R	7	1	1	2	0	1	0	2	1	2	1	1	1	1	2	1	0	0	0	0	0	0	24		2421.22
pep1296	DLIAYLKKATNE	0.00397559	0.00746231	0.00560144	0.0310704	0.0366552	0.0157449	4.8987	2.2924	0.0249541	1.60286	1	P62897	CYC_MOUSE	Cytochrome c, somatic	Cycs	TKMIFAGIKKKGERADLIAYLKKATNE___	ERADLIAYLKKATNE_______________	A	D	L	N	E	-	2	0	1	1	0	0	1	0	0	1	2	2	0	0	0	0	1	0	1	0	0	0	12		1377.75
pep3435	MGNEIDTQNR	0.00585863	0.0549842	0.00825456	0.104662	0.139058	0.0947498	4.89844	2.29232	0.0126419	1.89819	1	P60879	SNP25_MOUSE	Synaptosomal-associated protein 25 (SNAP-25) (Super protein) (SUP) (Synaptosomal-associated 25 kDa protein)	Snap25 Snap	QVSGIIGNLRHMALDMGNEIDTQNRQIDRI	HMALDMGNEIDTQNRQIDRIMEKADSNKTR	D	M	G	N	R	Q	0	1	2	1	0	1	1	1	0	1	0	0	1	0	0	0	1	0	0	0	0	0	10		1176.52
pep1532	EVRPQVHPNYRVTV	0.364161	0.683543	0.513088	1.62233	2.9577	2.8633	4.76894	2.25367	0.0111939	1.95102	1	Q9WTT4	VATG2_MOUSE	V-type proton ATPase subunit G 2 (V-ATPase subunit G 2) (V-ATPase 13 kDa subunit 2) (Vacuolar proton pump subunit G 2)	Atp6v1g2 Atp6g2 Ng38	RNRERVLAQLLGMVCEVRPQVHPNYRVTV_	CEVRPQVHPNYRVTV_______________	C	E	V	T	V	-	0	2	1	0	0	1	1	0	1	0	0	0	0	0	2	0	1	0	1	4	0	0	14		1692.91
pep6281	VGNLPFNTVQGDIDAI	0.00429807	0.00806761	0.00605579	0.0191478	0.0357035	0.0328844	4.76268	2.25177	0.0115203	1.93854	1	Q9WUK2	IF4H_MOUSE	Eukaryotic translation initiation factor 4H (eIF-4H) (Williams-Beuren syndrome chromosomal region 1 protein homolog)	Eif4h Wbscr1	RSQKELPTEPPYTAYVGNLPFNTVQGDIDA	GNLPFNTVQGDIDAIFKDLSIRSVRLVRDK	Y	V	G	A	I	F	1	0	2	2	0	1	0	2	0	2	1	0	0	1	1	0	1	0	0	2	0	0	16		1671.85
pep2553	ITAFNDGLNHLDSLKGTFA	0.00804741	0.0151052	0.0113385	0.035851	0.066734	0.0569613	4.62573	2.20968	0.0111279	1.95359	1	P02088	HBB1_MOUSE	Hemoglobin subunit beta-1 (Beta-1-globin) (Hemoglobin beta-1 chain) (Hemoglobin beta-major chain)	Hbb-b1	AIMGNAKVKAHGKKVITAFNDGLNHLDSLK	NDGLNHLDSLKGTFASLSELHCDKLHVDPE	V	I	T	F	A	S	2	0	2	2	0	0	0	2	1	1	3	1	0	2	0	1	2	0	0	0	0	0	19		2033.02
pep1697	FPWGDGNHTLF	0.00435277	0.00817029	0.00613287	0.0293327	0.0212954	0.0354265	4.61272	2.20562	0.00608331	2.21586	1	P43024	CX6A1_MOUSE	Cytochrome c oxidase subunit 6A1, mitochondrial (Cytochrome c oxidase polypeptide VIa-liver)	Cox6a1 Cox6al	PPFVAYPHLRIRTKPFPWGDGNHTLFHNPH	RTKPFPWGDGNHTLFHNPHVNPLPTGYEDE	P	F	P	L	F	H	0	0	1	1	0	0	0	2	1	0	1	0	0	2	1	0	1	1	0	0	0	0	11		1289.58
pep6078	TSVAKVYYSQTTQTE	0.0127436	0.00478402	0.00359103	0.0426147	0.0299275	0.0248364	4.61104	2.20509	0.0134206	1.87223	1	Q9JM63	KCJ10_MOUSE	ATP-sensitive inward rectifier potassium channel 10 (Inward rectifier K(+) channel Kir4.1) (Potassium channel, inwardly rectifying subfamily J member 10)	Kcnj10	______________________________	TSVAKVYYSQTTQTESRPLVAPGIRRRRVL	M	T	S	T	E	S	1	0	0	0	0	2	1	0	0	0	0	1	0	0	0	2	4	0	2	2	0	0	15		1704.82
pep3190	LSPSPTPATQSPKKPPA	0.0500219	0.0187785	0.0140957	0.14784	0.106409	0.127891	4.60986	2.20472	0.00372641	2.42871	1	Q61548	AP180_MOUSE	Clathrin coat assembly protein AP180 (91 kDa synaptosomal-associated protein) (Clathrin coat-associated protein AP180) (Phosphoprotein F1-20)	Snap91	MMRPPFGAAAVPGTQLSPSPTPATQSPKKP	PSPTPATQSPKKPPAKDPLADLNIKDFL__	Q	L	S	P	A	K	2	0	0	0	0	1	0	0	0	0	1	2	0	0	6	3	2	0	0	0	0	0	17		1702.93
pep3504	MNAANVGWNGSTFA	0.0101937	0.0191338	0.0143624	0.0611431	0.0498711	0.0901224	4.60373	2.2028	0.0128524	1.89102	1	P34884	MIF_MOUSE	Macrophage migration inhibitory factor (MIF) (EC 5.3.2.1) (Delayed early response protein 6) (DER6) (Glycosylation-inhibiting factor) (GIF) (L-dopachrome isomerase) (L-dopachrome tautomerase) (EC 5.3.3.12) (Phenylpyruvate tautomerase)	Mif	RLHISPDRVYINYYDMNAANVGWNGSTFA_	DMNAANVGWNGSTFA_______________	D	M	N	F	A	-	3	0	3	0	0	0	0	2	0	0	0	0	1	1	0	1	1	1	0	1	0	0	14		1438.63
pep259	AEDIKTKIKNYKTAPFDS	0.00735062	0.0137973	0.0103567	0.0663439	0.0484515	0.0291114	4.56779	2.1915	0.0264403	1.57773	1	P56391	CX6B1_MOUSE	Cytochrome c oxidase subunit 6B1 (Cytochrome c oxidase subunit VIb isoform 1) (COX VIb-1)	Cox6b1 Cox6b	______________________________	IKTKIKNYKTAPFDSRFPNQNQTKNCWQNY	M	A	E	D	S	R	2	0	1	2	0	0	1	0	0	2	0	4	0	1	1	1	2	0	1	0	0	0	18		2068.08
pep2038	GMNTLVGY	0.00637545	0.0119669	0.00898274	0.0284025	0.0493136	0.0462112	4.53529	2.18119	0.00866596	2.06218	1	P12787	COX5A_MOUSE	Cytochrome c oxidase subunit 5A, mitochondrial (Cytochrome c oxidase polypeptide Va)	Cox5a	TYFNKPDIDAWELRKGMNTLVGYDLVPEPK	DAWELRKGMNTLVGYDLVPEPKIIDAALRA	K	G	M	G	Y	D	0	0	1	0	0	0	0	2	0	0	1	0	1	0	0	0	1	0	1	1	0	0	8		853.4
pep2381	HTPFLDEL	0.0286931	0.0107716	0.00808547	0.0963835	0.0630783	0.0560822	4.53298	2.18046	0.0161887	1.79079	1	Q9DB77	QCR2_MOUSE	Cytochrome b-c1 complex subunit 2, mitochondrial (Complex III subunit 2) (Core protein II) (Ubiquinol-cytochrome-c reductase complex core protein 2)	Uqcrc2	FVSGKKSMAASGNLGHTPFLDEL_______	AASGNLGHTPFLDEL_______________	G	H	T	E	L	-	0	0	0	1	0	0	1	0	1	0	2	0	0	1	1	0	1	0	0	0	0	0	8		970.476
pep5010	SGNIQRISQATAQIKNLMSQL	0.00542665	0.010186	0.00764591	0.0241756	0.0293932	0.050815	4.48798	2.16607	0.0307445	1.51223	1	Q9ER00	STX12_MOUSE	Syntaxin-12	Stx12	SGPQPRDFNSIIQTCSGNIQRISQATAQIK	ISQATAQIKNLMSQLGTKQDSSKLQENLQQ	C	S	G	Q	L	G	2	1	2	0	0	4	0	1	0	3	2	1	1	0	0	3	1	0	0	0	0	0	21		2300.23
pep6632	YEVPLETPR	0.00404704	0.00759643	0.00570211	0.0327035	0.0197996	0.0240499	4.4134	2.14189	0.00739361	2.13114	1	P70699	LYAG_MOUSE	Lysosomal alpha-glucosidase (EC 3.2.1.20) (Acid maltase)	Gaa	DSRLHFKIKDPASKRYEVPLETPRVLSQAP	DPASKRYEVPLETPRVLSQAPSPLYSVEFS	R	Y	E	P	R	V	0	1	0	0	0	0	2	0	0	0	1	0	0	0	2	0	1	0	1	1	0	0	9		1102.57
pep2487	ILDSIGRFFSGDRGAPKRGSG	0.031133	0.0584376	0.0438651	0.284722	0.176823	0.123299	4.38297	2.13191	0.0352946	1.45229	1	P04370	MBP_MOUSE	Myelin basic protein (MBP) (Myelin A1 protein)	Mbp Shi	DHARHGFLPRHRDTGILDSIGRFFSGDRGA	RFFSGDRGAPKRGSGKDSHTRTTHYGSLPQ	G	I	L	S	G	K	1	3	0	2	0	0	0	5	0	2	1	1	0	2	1	3	0	0	0	0	0	0	21		2192.14
pep71	AAPAAAAAPAKAE	0.00230443	0.00432548	0.00324684	0.0166732	0.0174331	0.00912645	4.37722	2.13002	0.0149078	1.82659	1	P14869	RLA0_MOUSE	60S acidic ribosomal protein P0 (60S ribosomal protein L10E)	Rplp0 Arbp	PSAFAAAAPAAAATTAAPAAAAAPAKAEAK	TTAAPAAAAAPAKAEAKEESEESDEDMGFG	T	A	A	A	E	A	9	0	0	0	0	0	1	0	0	0	0	1	0	0	2	0	0	0	0	0	0	0	13		1108.59
pep6451	VPERAPLPPPVPSQ	0.00327167	0.00614102	0.00460964	0.0145752	0.0299537	0.0163309	4.34021	2.11776	0.0339658	1.46896	1	Q0VGU4	VGF_MOUSE	Neurosecretory protein VGF [Cleaved into: Neuroendocrine regulatory peptide-1 (NERP-1); Neuroendocrine regulatory peptide-2 (NERP-2); VGF-derived peptide TLQP-21; VGF-derived peptide TLQP-62]	Vgf	PERVWRASWGEFQARVPERAPLPPPVPSQF	RVPERAPLPPPVPSQFQARMSESAPLPETH	R	V	P	S	Q	F	1	1	0	0	0	1	1	0	0	0	1	0	0	0	6	1	0	0	0	2	0	0	14		1482.82
pep4468	RHGFLPRHRDTGILDSIGR	0.019871	0.0372985	0.0279974	0.134154	0.0972162	0.136962	4.32482	2.11264	0.002365	2.62617	1	P04370	MBP_MOUSE	Myelin basic protein (MBP) (Myelin A1 protein)	Mbp Shi	QRSKYLATASTMDHARHGFLPRHRDTGILD	LPRHRDTGILDSIGRFFSGDRGAPKRGSGK	A	R	H	G	R	F	0	4	0	2	0	0	0	3	2	2	2	0	0	1	1	1	1	0	0	0	0	0	19		2202.19
pep706	APPEPVPPPRAA	0.0111054	0.0208452	0.015647	0.0965998	0.0543317	0.0547791	4.32186	2.11165	0.021076	1.67621	1	Q0VGU4	VGF_MOUSE	Neurosecretory protein VGF [Cleaved into: Neuroendocrine regulatory peptide-1 (NERP-1); Neuroendocrine regulatory peptide-2 (NERP-2); VGF-derived peptide TLQP-21; VGF-derived peptide TLQP-62]	Vgf	SIIEEVEEKRKRKKNAPPEPVPPPRAAPAP	KKNAPPEPVPPPRAAPAPTHVRSPQPPPPA	N	A	P	A	A	P	3	1	0	0	0	0	1	0	0	0	0	0	0	0	6	0	0	0	0	1	0	0	12		1197.65
pep192	ADKQISLPAKLINGGIAG	0.00312162	0.00585939	0.00439824	0.0139067	0.0209143	0.0229101	4.31498	2.10935	0.00650934	2.18646	1	Q9D6M3	GHC1_MOUSE	Mitochondrial glutamate carrier 1 (GC-1) (Glutamate/H(+) symporter 1) (Solute carrier family 25 member 22)	Slc25a22 Gc1	______________________________	QISLPAKLINGGIAGLIGVTCVFPIDLAKT	M	A	D	A	G	L	3	0	1	1	0	1	0	3	0	3	2	2	0	0	1	1	0	0	0	0	0	0	18		1765.01
pep561	ALEATDNQAIKALLQ	0.00301995	0.00566853	0.00425497	0.0205191	0.0231276	0.0119602	4.29614	2.10304	0.0147095	1.8324	1	P62774	MTPN_MOUSE	Myotrophin (Granule cell differentiation protein) (Protein V-1)	Mtpn Gcdp	SKGADKTVKGPDGLTALEATDNQAIKALLQ	ALEATDNQAIKALLQ_______________	T	A	L	L	Q	-	4	0	1	1	0	2	1	0	0	1	3	1	0	0	0	0	1	0	0	0	0	0	15		1597.87
pep6184	VAYWRQAGLSYIRFS	0.00614018	0.0115253	0.0432563	0.0584367	0.101047	0.100967	4.27515	2.09598	0.0221319	1.65498	1	P56382	ATP5E_MOUSE	ATP synthase subunit epsilon, mitochondrial (ATPase subunit epsilon) (ATP synthase F1 subunit epsilon)	Atp5f1e Atp5e	______________________________	VAYWRQAGLSYIRFSQICAKAVRDALKTEF	M	V	A	F	S	Q	2	2	0	0	0	1	0	1	0	1	1	0	0	1	0	2	0	1	2	1	0	0	15		1815.94
pep3462	MIQNVGNHLR	0.00397192	0.00745543	0.00559627	0.0176948	0.0317554	0.0232331	4.26956	2.09409	0.0116406	1.93403	1	Q8VHQ9	ACO11_MOUSE	Acyl-coenzyme A thioesterase 11 (Acyl-CoA thioesterase 11) (EC 3.1.2.-) (Acyl-CoA thioester hydrolase 11) (Adipose-associated thioesterase) (Brown fat-inducible thioesterase) (BFIT) (Palmitoyl-coenzyme A thioesterase) (EC 3.1.2.2)	Acot11 Bfit Thea	______________________________	______________________________	-	M	I	L	R	R	0	1	2	0	0	1	0	1	1	1	1	0	1	0	0	0	0	0	0	1	0	0	10		1180.61
pep2093	GPPQPGPGPQRQGPPLQ	0.00220978	0.00414784	0.00311349	0.00984453	0.0158156	0.0140957	4.19759	2.06956	0.00559843	2.25193	1	O88935	SYN1_MOUSE	Synapsin-1 (Synapsin I)	Syn1 Syn-1	QPAGPPAQQRPPPQGGPPQPGPGPQRQGPP	PQPGPGPQRQGPPLQQRPPPQGQQHLSGLG	G	G	P	L	Q	Q	0	1	0	0	0	4	0	4	0	0	1	0	0	0	7	0	0	0	0	0	0	0	17		1706.89
pep1855	GDVNTDRPGLLDL	0.00389413	0.0073094	0.00548666	0.0220877	0.0190515	0.0283488	4.1634	2.05776	0.00376906	2.42377	1	P31786	ACBP_MOUSE	Acyl-CoA-binding protein (ACBP) (Diazepam-binding inhibitor) (DBI) (Endozepine) (EP)	Dbi	EEMLFIYSHFKQATVGDVNTDRPGLLDLKG	TVGDVNTDRPGLLDLKGKAKWDSWNKLKGT	V	G	D	D	L	K	0	1	1	3	0	0	0	2	0	0	3	0	0	0	1	0	1	0	0	1	0	0	13		1383.7
pep6702	YLATSQPRPDSSGSGH	0.00534756	0.0100375	0.00753449	0.0238232	0.0377137	0.0337635	4.15803	2.0559	0.00516321	2.28708	1	Q6P5F7	TTYH3_MOUSE	Protein tweety homolog 3 (mTTY3)	Ttyh3 Kiaa1691	RESPPPSYTSSMRAKYLATSQPRPDSSGSG	LATSQPRPDSSGSGH_______________	K	Y	L	G	H	-	1	1	0	1	0	1	0	2	1	0	1	0	0	0	2	4	1	0	1	0	0	0	16		1658.76
pep1557	FASFPTTKT	0.00586289	0.0110048	0.00826057	0.0422973	0.0286834	0.0331685	4.1447	2.05127	0.00351276	2.45435	1	P01942	HBA_MOUSE	Hemoglobin subunit alpha (Alpha-globin) (Hemoglobin alpha chain)	Hba Hba-a1	GGHGAEYGAEALERMFASFPTTKTYFPHFD	EALERMFASFPTTKTYFPHFDVSHGSAQVK	M	F	A	K	T	Y	1	0	0	0	0	0	0	0	0	0	0	1	0	2	1	1	3	0	0	0	0	0	9		998.507
pep3899	PAYHSSLMDPDTKLIG	0.034496	0.01295	0.00972069	0.0719289	0.088329	0.0766131	4.14351	2.05085	0.00284789	2.54548	1	Q9JM76	ARPC3_MOUSE	Actin-related protein 2/3 complex subunit 3 (Arp2/3 complex 21 kDa subunit) (p21-ARC)	Arpc3	______________________________	AYHSSLMDPDTKLIGNMALLPLRSQFKGPA	M	P	A	I	G	N	1	0	0	2	0	0	0	1	1	1	2	1	1	0	2	2	1	0	1	0	0	0	16		1743.85
pep3980	PGGLLLGDEAPNFEAN	0.00200207	0.00375794	0.00282082	0.00891915	0.015148	0.0114158	4.13514	2.04794	0.00883447	2.05382	1	O08709	PRDX6_MOUSE	Peroxiredoxin-6 (EC 1.11.1.27) (1-Cys peroxiredoxin) (1-Cys PRX) (Acidic calcium-independent phospholipase A2) (aiPLA2) (EC 3.1.1.4) (Antioxidant protein 2) (Glutathione-dependent peroxiredoxin) (Lysophosphatidylcholine acyltransferase 5) (LPC acyltransferase 5) (LPCAT-5) (Lyso-PC acyltransferase 5) (EC 2.3.1.23) (Non-selenium glutathione peroxidase) (NSGPx)	Prdx6 Aop2 Ltw4 Prdx5	______________________________	GGLLLGDEAPNFEANTTIGRIRFHDFLGDS	M	P	G	A	N	T	2	0	2	1	0	0	2	3	0	0	3	0	0	1	2	0	0	0	0	0	0	0	16		1612.77
pep6608	YAYGATGHPGIIPPHATLVFDVELL	0.0079707	0.0149613	0.0112304	0.0553462	0.0389956	0.046796	4.13138	2.04663	0.00225955	2.64598	1	P26883	FKB1A_MOUSE	Peptidyl-prolyl cis-trans isomerase FKBP1A (PPIase FKBP1A) (EC 5.2.1.8) (12 kDa FK506-binding protein) (12 kDa FKBP) (FKBP-12) (Calstabin-1) (FK506-binding protein 1A) (FKBP-1A) (Immunophilin FKBP12) (Rotamase)	Fkbp1a Fkbp1	QMSVGQRAKLIISSDYAYGATGHPGIIPPH	IIPPHATLVFDVELLKLE____________	D	Y	A	L	L	K	3	0	0	1	0	0	1	3	2	2	3	0	0	1	3	0	2	0	2	2	0	0	25		2650.38
pep4362	RALQDILDFTGPPAFPK	0.00250848	0.00470849	0.00353434	0.0214312	0.0128848	0.00993458	4.11583	2.04118	0.0333615	1.47675	1	A2AG50	MA7D2_MOUSE	MAP7 domain-containing protein 2	Map7d2 Mtap7d2	MIPGMSLDQNGTGNARALQDILDFTGPPAF	LQDILDFTGPPAFPKKSSENLSLDDCNKNL	A	R	A	P	K	K	2	1	0	2	0	1	0	1	0	1	2	1	0	2	3	0	1	0	0	0	0	0	17		1885.01
pep6469	VPRPEDTLTYADLDMVHLS	0.00192011	0.0036041	0.00270535	0.0152242	0.0108736	0.0076044	4.09526	2.03395	0.0198258	1.70277	1	P97797	SHPS1_MOUSE	Tyrosine-protein phosphatase non-receptor type substrate 1 (SHP substrate 1) (SHPS-1) (Brain Ig-like molecule with tyrosine-based activation motifs) (Bit) (CD172 antigen-like family member A) (Inhibitory receptor SHPS-1) (MyD-1 antigen) (Signal-regulatory protein alpha-1) (Sirp-alpha-1) (mSIRP-alpha1) (p84) (CD antigen CD172a)	Sirpa Bit Myd1 Ptpns1 Shps1 Sirp	EPNNHTEYASIETGKVPRPEDTLTYADLDM	EDTLTYADLDMVHLSRAQPAPKPEPSFSEY	K	V	P	L	S	R	1	1	0	3	0	0	1	0	1	0	3	0	1	0	2	1	2	0	1	2	0	0	19		2171.06
pep2928	LDKADIAVPLVFTK	0.00422275	0.00792624	0.00594967	0.036096	0.0206592	0.0168792	4.0685	2.0245	0.0362715	1.44043	1	Q7TSJ2	MAP6_MOUSE	Microtubule-associated protein 6 (MAP-6) (Stable tubule-only polypeptide) (STOP)	Map6 Mtap6	PCITRACCIARFWNQLDKADIAVPLVFTKY	QLDKADIAVPLVFTKYSEATEHPGAPPQPP	Q	L	D	T	K	Y	2	0	0	2	0	0	0	0	0	1	2	2	0	1	1	0	1	0	0	2	0	0	14		1528.89
pep1002	ATASTMDHARHGF	0.0181189	0.00680194	0.00510575	0.0413732	0.0328095	0.0479381	4.06709	2.024	0.00685832	2.16378	1	P04370	MBP_MOUSE	Myelin basic protein (MBP) (Myelin A1 protein)	Mbp Shi	VMASQKRPSQRSKYLATASTMDHARHGFLP	YLATASTMDHARHGFLPRHRDTGILDSIGR	L	A	T	G	F	L	3	1	0	1	0	0	0	1	2	0	0	0	1	1	0	1	2	0	0	0	0	0	13		1400.63
pep606	AMDASHPSLQ	0.00612988	0.011506	0.00863673	0.0273084	0.0425039	0.0368532	4.05996	2.02146	0.00467124	2.33057	1	P06797	CATL1_MOUSE	Procathepsin L (EC 3.4.22.15) (Cathepsin L1) (Major excreted protein) (MEP) (p39 cysteine proteinase) [Cleaved into: Cathepsin L; Cathepsin L heavy chain; Cathepsin L light chain]	Ctsl Ctsl1	KALMKAVATVGPISVAMDASHPSLQFYSSG	GPISVAMDASHPSLQFYSSGIYYEPNCSSK	V	A	M	L	Q	F	2	0	0	1	0	1	0	0	1	0	1	0	1	0	1	2	0	0	0	0	0	0	10		1055.47
pep4585	RLQEQEELENYIEHVLLHRP	0.0545112	0.0204639	0.0153608	0.105642	0.141138	0.11835	4.04191	2.01504	0.00470104	2.32781	1	Q0VGU4	VGF_MOUSE	Neurosecretory protein VGF [Cleaved into: Neuroendocrine regulatory peptide-1 (NERP-1); Neuroendocrine regulatory peptide-2 (NERP-2); VGF-derived peptide TLQP-21; VGF-derived peptide TLQP-62]	Vgf	AQARRAQEEADAEERRLQEQEELENYIEHV	EELENYIEHVLLHRP_______________	R	R	L	R	P	-	0	2	1	0	0	2	5	0	2	1	4	0	0	0	1	0	0	0	1	1	0	0	20		2544.31
pep1103	AVFVDLEPTVIDEVR	0.0296088	0.0111153	0.00834351	0.0852224	0.0762515	0.036571	4.03616	2.01298	0.0386497	1.41285	1	P68369	TBA1A_MOUSE	Tubulin alpha-1A chain (Alpha-tubulin 1) (Alpha-tubulin isotype M-alpha-1) (Tubulin alpha-1 chain) [Cleaved into: Detyrosinated tubulin alpha-1A chain]	Tuba1a Tuba1	NTFFSETGAGKHVPRAVFVDLEPTVIDEVR	AVFVDLEPTVIDEVRTGTYRQLFHPEQLIT	R	A	V	V	R	T	1	1	0	2	0	0	2	0	0	1	1	0	0	1	1	0	1	0	0	4	0	0	15		1700.9
pep2268	HGIDPTGSYHGDSDLQLE	0.0163702	0.00614549	0.0249109	0.0558716	0.0815897	0.0529776	4.01545	2.00556	0.0108047	1.96639	1	Q7TMM9	TBB2A_MOUSE	Tubulin beta-2A chain	Tubb2a Tubb2	GNQIGAKFWEVISDEHGIDPTGSYHGDSDL	DPTGSYHGDSDLQLERINVYYNEAAGNKYV	E	H	G	L	E	R	0	0	0	3	0	1	1	3	2	1	2	0	0	0	1	2	1	0	1	0	0	0	18		1939.85
pep456	AGRSAVSASSKWLDGFR	0.0138545	0.0260054	0.0195204	0.0826308	0.0677813	0.0873279	4.00369	2.00133	0.000973928	3.01147	1	Q9D855	QCR7_MOUSE	Cytochrome b-c1 complex subunit 7 (Complex III subunit 7) (Complex III subunit VII) (Ubiquinol-cytochrome c reductase complex 14 kDa protein)	Uqcrb	______________________________	RSAVSASSKWLDGFRKWYYNAAGFNKLGLM	M	A	G	F	R	K	3	2	0	1	0	0	0	2	0	0	1	1	0	1	0	4	0	1	0	1	0	0	17		1793.92
pep5232	SLPAVVIEIKNVPNKQPESSL	0.0099578	0.0186911	0.0140301	0.0773681	0.0487172	0.0444842	3.99657	1.99876	0.0160019	1.79583	1	Q60738	ZNT1_MOUSE	Zinc transporter 1 (ZnT-1) (Solute carrier family 30 member 1)	Slc30a1 Znt1	SENLEKKARRTKAEGSLPAVVIEIKNVPNK	IEIKNVPNKQPESSL_______________	G	S	L	S	L	-	1	0	2	0	0	1	2	0	0	2	2	2	0	0	3	3	0	0	0	3	0	0	21		2261.26
pep6464	VPPVQVSPLIKFGRYSAL	0.00456059	0.00856038	0.00642568	0.0203173	0.0245433	0.0332305	3.99512	1.99824	0.00797511	2.09826	1	Q06185	ATP5I_MOUSE	ATP synthase subunit e, mitochondrial (ATPase subunit e) (ATP synthase membrane subunit e)	Atp5me Atp5i Atp5k Lfm-1 Lfm1	______________________________	VQVSPLIKFGRYSALIIGMAYGAKRYSYLK	M	V	P	A	L	I	1	1	0	0	0	1	0	1	0	1	2	1	0	1	3	2	0	0	1	3	0	0	18		1970.14
pep4186	PSVTQVTR	0.0107764	0.0202276	0.0151835	0.0886926	0.052722	0.0430164	3.99309	1.99751	0.0312411	1.50527	1	Q8K021	SCAM1_MOUSE	Secretory carrier-associated membrane protein 1 (Secretory carrier membrane protein 1)	Scamp1	SNPFADPDLNNPFKDPSVTQVTRNVPPGLD	LNNPFKDPSVTQVTRNVPPGLDEYNPFSDS	D	P	S	T	R	N	0	1	0	0	0	1	0	0	0	0	0	0	0	0	1	1	2	0	0	2	0	0	8		886.487
pep3860	NVKQVDVPTLTGAF	0.00573327	0.0107615	0.00807793	0.0255415	0.034984	0.0373395	3.98267	1.99373	0.003271	2.48532	1	Q9D3D9	ATPD_MOUSE	ATP synthase subunit delta, mitochondrial (ATP synthase F1 subunit delta) (F-ATPase delta subunit)	Atp5f1d Atp5d	SFTFASPTQVFFDSANVKQVDVPTLTGAFG	ANVKQVDVPTLTGAFGILASHVPTLQVLRP	A	N	V	A	F	G	1	0	1	1	0	1	0	1	0	0	1	1	0	1	1	0	2	0	0	3	0	0	14		1487.8
pep2372	HSRMVIPGGIDVHTR	0.00585298	0.0109862	0.0082466	0.0260749	0.0299314	0.0437071	3.97489	1.99092	0.010995	1.95881	1	O08553	DPYL2_MOUSE	Dihydropyrimidinase-related protein 2 (DRP-2) (Unc-33-like phosphoprotein 2) (ULIP-2)	Dpysl2 Crmp2 Ulip2	GENLIVPGGVKTIEAHSRMVIPGGIDVHTR	HSRMVIPGGIDVHTRFQMPDQGMTSADDFF	A	H	S	T	R	F	0	2	0	1	0	0	0	2	2	2	0	0	1	0	1	1	1	0	0	2	0	0	15		1673.88
pep466	AGRVDLVDESGYVPGY	0.00376886	0.00707428	0.00531017	0.0167902	0.0224008	0.0247379	3.95764	1.98464	0.00332329	2.47843	1	Q7TQD2	TPPP_MOUSE	Tubulin polymerization-promoting protein (TPPP) (EC 3.6.5.-) (25 kDa brain-specific protein) (TPPP/p25) (p25-alpha)	Tppp	SHKERFDQSGKGKGKAGRVDLVDESGYVPG	GRVDLVDESGYVPGYKHAGTYDQKVQGGK_	K	A	G	G	Y	K	1	1	0	2	0	0	1	3	0	0	1	0	0	0	1	1	0	0	2	3	0	0	16		1695.81
pep127	AAVKTLNPKAEVARAQAAL	0.00765843	0.0143751	0.0107904	0.0341181	0.0507681	0.0446216	3.94553	1.98022	0.00353015	2.45221	1	P80317	TCPZ_MOUSE	T-complex protein 1 subunit zeta (TCP-1-zeta) (CCT-zeta-1)	Cct6a Cct6 Cctz Cctz1	______________________________	TLNPKAEVARAQAALAVNISAARGLQDVLR	M	A	A	A	L	A	7	1	1	0	0	1	1	0	0	0	2	2	0	0	1	0	1	0	0	2	0	0	19		1921.11
pep1803	GAPPGYRPSAWVHLLH	0.0166026	0.0311636	0.0233924	0.113103	0.10076	0.065753	3.92948	1.97434	0.00932518	2.03034	1	Q9D3A9	TTYH1_MOUSE	Protein tweety homolog 1 (mTTY1)	Ttyh1	______________________________	APPGYRPSAWVHLLHQLPRADFQLRPVPSG	M	G	A	L	H	Q	2	1	0	0	0	0	0	2	2	0	2	0	0	0	3	1	0	1	1	1	0	0	16		1756.92
pep402	AGLPRRIIKETQRLL	0.00625871	0.0117478	0.00881825	0.0278824	0.046628	0.0307594	3.92435	1.97245	0.0123602	1.90798	1	P61089	UBE2N_MOUSE	Ubiquitin-conjugating enzyme E2 N (EC 2.3.2.23) (Bendless-like ubiquitin-conjugating enzyme) (E2 ubiquitin-conjugating enzyme N) (Ubc13) (Ubiquitin carrier protein N) (Ubiquitin-protein ligase N)	Ube2n Blu	______________________________	AGLPRRIIKETQRLLAEPVPGIKAEPDESN	M	A	G	L	L	A	1	3	0	0	0	1	1	1	0	2	3	1	0	0	1	0	1	0	0	0	0	0	15		1763.09
pep4851	SASAGGSHQPSQSRAIPTRTVAI	0.00853767	0.0160255	0.0120292	0.0435997	0.0417694	0.0581977	3.92341	1.97211	0.00318161	2.49735	1	P70445	4EBP2_MOUSE	Eukaryotic translation initiation factor 4E-binding protein 2 (4E-BP2) (eIF4E-binding protein 2) (Phosphorylated heat- and acid-stable protein regulated by insulin 2) (PHAS-II)	Eif4ebp2	______________________________	QPSQSRAIPTRTVAISDAAQLPQDYCTTPG	M	S	A	A	I	S	4	2	0	0	0	2	0	2	1	2	0	0	0	0	2	5	2	0	0	1	0	0	23		2278.18
pep5001	SGGPVDIGPEYQQDLDRELYKL	0.00535866	0.0100584	0.00755013	0.0238727	0.0296172	0.0365769	3.92154	1.97142	0.00464681	2.33285	1	P97450	ATP5J_MOUSE	ATP synthase-coupling factor 6, mitochondrial (ATPase subunit F6) (ATP synthase peripheral stalk subunit F6)	Atp5pf Atp5j	LFVDKIREYKSKRQASGGPVDIGPEYQQDL	GPEYQQDLDRELYKLKQMYGKGEMDTFPTF	A	S	G	K	L	K	0	1	0	3	0	2	2	3	0	1	3	1	0	0	2	1	0	0	2	1	0	0	22		2491.22
pep6126	TVGDVNTDRPGLLD	0.00519613	0.00975331	0.00732113	0.0275124	0.0254214	0.0340803	3.90713	1.96611	0.00179172	2.74673	1	P31786	ACBP_MOUSE	Acyl-CoA-binding protein (ACBP) (Diazepam-binding inhibitor) (DBI) (Endozepine) (EP)	Dbi	TDEEMLFIYSHFKQATVGDVNTDRPGLLDL	ATVGDVNTDRPGLLDLKGKAKWDSWNKLKG	A	T	V	L	D	L	0	1	1	3	0	0	0	2	0	0	2	0	0	0	1	0	2	0	0	2	0	0	14		1470.73
pep3519	MNQEKLAKLQA	0.00561117	0.0105324	0.0079059	0.0262228	0.0274519	0.0401787	3.90252	1.96441	0.00765503	2.11605	1	Q9CQH7	BT3L4_MOUSE	Transcription factor BTF3 homolog 4 (Basic transcription factor 3-like 4)	Btf3l4	______________________________	______________________________	-	M	N	Q	A	Q	2	0	1	0	0	2	1	0	0	0	2	2	1	0	0	0	0	0	0	0	0	0	11		1272.69
pep3755	NLQSLDPSHRISD	0.00400601	0.00751942	0.0056443	0.0178467	0.0285176	0.0205866	3.89936	1.96324	0.00779793	2.10802	1	P09240	CCKN_MOUSE	Cholecystokinin (CCK) [Cleaved into: Cholecystokinin-33 (CCK33); Cholecystokinin-12 (CCK12); Cholecystokinin-8 (CCK8)]	Cck	QQVRKAPSGRMSVLKNLQSLDPSHRISDRD	LKNLQSLDPSHRISDRDYMGWMDFGRRSAE	K	N	L	S	D	R	0	1	1	2	0	1	0	0	1	1	2	0	0	0	1	3	0	0	0	0	0	0	13		1480.73
pep2201	GVQVSPSGEKI	0.00696352	0.0130708	0.00981131	0.031723	0.0340681	0.0504422	3.89449	1.96143	0.00941367	2.02624	1	P52503	NDUS6_MOUSE	NADH dehydrogenase [ubiquinone] iron-sulfur protein 6, mitochondrial (Complex I-13kD-A) (CI-13kD-A) (NADH-ubiquinone oxidoreductase 13 kDa-A subunit)	Ndufs6 Ip13	TFRRLLTLPRAARGFGVQVSPSGEKITHTG	ARGFGVQVSPSGEKITHTGQVYDEKDYRRV	F	G	V	K	I	T	0	0	0	0	0	1	1	2	0	1	0	1	0	0	1	2	0	0	0	2	0	0	11		1099.59
pep4374	RAPSFHDKYGNAILA	0.117704	0.123321	0.157699	0.593638	0.517087	0.438955	3.8866	1.95851	0.00116473	2.93377	1	P56393	COX7B_MOUSE	Cytochrome c oxidase subunit 7B, mitochondrial (Cytochrome c oxidase polypeptide VIIb)	Cox7b	VRSIQQVVARQSHQKRAPSFHDKYGNAILA	RAPSFHDKYGNAILAGGAIFCVSTWTYTAT	K	R	A	L	A	G	3	1	1	1	0	0	0	1	1	1	1	1	0	1	1	1	0	0	1	0	0	0	15		1658.85
pep2813	KTEWLDGKHVVFGK	0.00479328	0.00899715	0.00675353	0.0297843	0.0234505	0.0265065	3.8815	1.95661	0.000848025	3.07159	1	P17742	PPIA_MOUSE	Peptidyl-prolyl cis-trans isomerase A (PPIase A) (EC 5.2.1.8) (Cyclophilin A) (Cyclosporin A-binding protein) (Rotamase A) (SP18) [Cleaved into: Peptidyl-prolyl cis-trans isomerase A, N-terminally processed]	Ppia	AGPNTNGSQFFICTAKTEWLDGKHVVFGKV	AKTEWLDGKHVVFGKVKEGMNIVEAMERFG	A	K	T	G	K	V	0	0	0	1	0	0	1	2	1	0	1	3	0	1	0	0	1	1	0	2	0	0	14		1642.88
pep2620	KDYAVSTVPVADSL	0.00525133	0.00985692	0.0073989	0.0233945	0.0339968	0.0298418	3.8758	1.95449	0.00302067	2.5199	1	Q9CWS0	DDAH1_MOUSE	N(G),N(G)-dimethylarginine dimethylaminohydrolase 1 (DDAH-1) (Dimethylarginine dimethylaminohydrolase 1) (EC 3.5.3.18) (DDAHI) (Dimethylargininase-1)	Ddah1	KRTNQRGAEILADTFKDYAVSTVPVADSLH	FKDYAVSTVPVADSLHLKSFCSMAGPNLIA	F	K	D	S	L	H	2	0	0	2	0	0	0	0	0	0	1	1	0	0	1	2	1	0	1	3	0	0	14		1463.75
pep1126	AVNLSRNGPALQEA	0.00526878	0.00988966	0.00742348	0.0271287	0.0257768	0.0343287	3.86301	1.94973	0.00191769	2.71722	1	Q62418	DBNL_MOUSE	Drebrin-like protein (Actin-binding protein 1) (SH3 domain-containing protein 7)	Dbnl Abp1 Sh3p7	______________________________	MAVNLSRNGPALQEAYVRVVTEKSPTDWAL	M	A	V	E	A	Y	3	1	2	0	0	1	1	1	0	0	2	0	0	0	1	1	0	0	0	1	0	0	14		1438.75
pep1251	DIDAWELRKGMNTL	0.00404189	0.00758676	0.00569485	0.0180065	0.0247576	0.0237673	3.84053	1.94131	0.00218339	2.66087	1	P12787	COX5A_MOUSE	Cytochrome c oxidase subunit 5A, mitochondrial (Cytochrome c oxidase polypeptide Va)	Cox5a	DEEFDARWVTYFNKPDIDAWELRKGMNTLV	PDIDAWELRKGMNTLVGYDLVPEPKIIDAA	P	D	I	T	L	V	1	1	1	2	0	0	1	1	0	1	2	1	1	0	0	0	1	1	0	0	0	0	14		1660.82
pep2118	GRLDSGQLGLYPANYVEAI	0.00378482	0.00710422	0.00533265	0.0168613	0.0236003	0.0216063	3.82623	1.93592	0.0023215	2.63423	1	Q61644	PACN1_MOUSE	Protein kinase C and casein kinase substrate in neurons protein 1 (Syndapin-1)	Pacsin1 Pacsin	ELTKLGEEDEQGWCRGRLDSGQLGLYPANY	SGQLGLYPANYVEAI_______________	R	G	R	A	I	-	2	1	1	1	0	1	1	3	0	1	3	0	0	0	1	1	0	0	2	1	0	0	19		2035.04
pep5595	SVAEKTKEQASHLGGAVF	0.0119042	0.0223445	0.0167725	0.0530328	0.073871	0.0682178	3.82433	1.93521	0.00225541	2.64678	1	Q91ZZ3	SYUB_MOUSE	Beta-synuclein	Sncb	LYVGSKTSGVVQGVASVAEKTKEQASHLGG	EKTKEQASHLGGAVFSGAGNIAAATGLVKK	A	S	V	V	F	S	3	0	0	0	0	1	2	2	1	0	1	2	0	1	0	2	1	0	0	2	0	0	18		1857.96
pep2251	HEQLSVAEITN	0.00613681	0.011519	0.00864651	0.0273393	0.0418513	0.0313921	3.8241	1.93512	0.00573283	2.24163	1	P68369	TBA1A_MOUSE	Tubulin alpha-1A chain (Alpha-tubulin 1) (Alpha-tubulin isotype M-alpha-1) (Tubulin alpha-1 chain) [Cleaved into: Detyrosinated tubulin alpha-1A chain]	Tuba1a Tuba1	PLATYAPVISAEKAYHEQLSVAEITNACFE	EKAYHEQLSVAEITNACFEPANQMVKCDPR	Y	H	E	T	N	A	1	0	1	0	0	1	2	0	1	1	1	0	0	0	0	1	1	0	0	1	0	0	11		1239.61
pep5082	SHHPADFTPA	0.00990647	0.0185948	0.0139578	0.0690856	0.0484661	0.0446059	3.81916	1.93325	0.00756575	2.12115	1	P01942	HBA_MOUSE	Hemoglobin subunit alpha (Alpha-globin) (Hemoglobin alpha chain)	Hba Hba-a1	VNFKLLSHCLLVTLASHHPADFTPAVHASL	LVTLASHHPADFTPAVHASLDKFLASVSTV	A	S	H	P	A	V	2	0	0	1	0	0	0	0	2	0	0	0	0	1	2	1	1	0	0	0	0	0	10		1078.48
pep6268	VGDVNTDRPGLLDL	0.00497712	0.00934221	0.00701255	0.0284373	0.0243499	0.0286239	3.81641	1.93222	0.000440019	3.35653	1	P31786	ACBP_MOUSE	Acyl-CoA-binding protein (ACBP) (Diazepam-binding inhibitor) (DBI) (Endozepine) (EP)	Dbi	DEEMLFIYSHFKQATVGDVNTDRPGLLDLK	TVGDVNTDRPGLLDLKGKAKWDSWNKLKGT	T	V	G	D	L	K	0	1	1	3	0	0	0	2	0	0	3	0	0	0	1	0	1	0	0	2	0	0	14		1482.77
pep1567	FDITADDEPLGRVSFE	0.00265188	0.00497766	0.00373638	0.016195	0.012974	0.0139309	3.79202	1.92297	0.000822981	3.08461	1	P17742	PPIA_MOUSE	Peptidyl-prolyl cis-trans isomerase A (PPIase A) (EC 5.2.1.8) (Cyclophilin A) (Cyclosporin A-binding protein) (Rotamase A) (SP18) [Cleaved into: Peptidyl-prolyl cis-trans isomerase A, N-terminally processed]	Ppia	______________________________	DITADDEPLGRVSFELFADKVPKTAENFRA	F	F	D	F	E	L	1	1	0	3	0	0	2	1	0	1	1	0	0	2	1	1	1	0	0	1	0	0	16		1809.84
pep5856	TGTPDPSRSIFKPFIFVDDV	0.0146533	0.0275047	0.0206458	0.0833637	0.0716892	0.0806949	3.75372	1.90832	0.000355616	3.44902	1	Q9CZC8	SCRN1_MOUSE	Secernin-1	Scrn1 Kiaa0193	SVLPQNRSSPCIHYFTGTPDPSRSIFKPFI	PSRSIFKPFIFVDDVKLVPKAQSPCFGDDD	F	T	G	D	V	K	0	1	0	3	0	0	0	1	0	2	0	1	0	3	3	2	2	0	0	2	0	0	20		2237.14
pep4845	SAPLVETSTPLR	0.00393446	0.00738511	0.00554349	0.0276095	0.0192488	0.0164224	3.75262	1.9079	0.0115429	1.93768	1	Q9QXV0	PCS1N_MOUSE	ProSAAS (IA-4) (Proprotein convertase subtilisin/kexin type 1 inhibitor) (Proprotein convertase 1 inhibitor) (pro-SAAS) [Cleaved into: KEP; Big SAAS (b-SAAS); Little SAAS (l-SAAS); Big PEN-LEN (b-PEN-LEN) (SAAS CT(1-49)); PEN; PEN-20; PEN-19; Little LEN (l-LEN); Big LEN (b-LEN) (SAAS CT(25-40))]	Pcsk1n	LSARPVKEPRSLSAASAPLVETSTPLRLRR	SAASAPLVETSTPLRLRRAVPRGEAAGAVQ	A	S	A	L	R	L	1	1	0	0	0	0	1	0	0	0	2	0	0	0	2	2	2	0	0	1	0	0	12		1269.69
pep1443	ELENYIEHVLLHRP	0.00373705	0.00701456	0.00526534	0.0166485	0.0253913	0.017997	3.74833	1.90625	0.00698842	2.15562	1	Q0VGU4	VGF_MOUSE	Neurosecretory protein VGF [Cleaved into: Neuroendocrine regulatory peptide-1 (NERP-1); Neuroendocrine regulatory peptide-2 (NERP-2); VGF-derived peptide TLQP-21; VGF-derived peptide TLQP-62]	Vgf	QEEADAEERRLQEQEELENYIEHVLLHRP_	EELENYIEHVLLHRP_______________	E	E	L	R	P	-	0	1	1	0	0	0	3	0	2	1	3	0	0	0	1	0	0	0	1	1	0	0	14		1760.92
pep5897	TLADEVSASLAKQ	0.00455801	0.00855554	0.00642205	0.0203058	0.0289399	0.023513	3.72442	1.89701	0.00305996	2.51428	1	P10637	TAU_MOUSE	Microtubule-associated protein tau (Neurofibrillary tangle protein) (Paired helical filament-tau) (PHF-tau)	Mapt Mtapt Tau	SSTGSIDMVDSPQLATLADEVSASLAKQGL	LATLADEVSASLAKQGL_____________	A	T	L	K	Q	G	3	0	0	1	0	1	1	0	0	0	2	1	0	0	0	2	1	0	0	1	0	0	13		1331.69
pep2857	KVPRPEDTLTYADLDMVHLS	0.00464265	0.0087144	0.00654129	0.0265009	0.0227135	0.0244185	3.70046	1.8877	0.000368907	3.43308	1	P97797	SHPS1_MOUSE	Tyrosine-protein phosphatase non-receptor type substrate 1 (SHP substrate 1) (SHPS-1) (Brain Ig-like molecule with tyrosine-based activation motifs) (Bit) (CD172 antigen-like family member A) (Inhibitory receptor SHPS-1) (MyD-1 antigen) (Signal-regulatory protein alpha-1) (Sirp-alpha-1) (mSIRP-alpha1) (p84) (CD antigen CD172a)	Sirpa Bit Myd1 Ptpns1 Shps1 Sirp	PEPNNHTEYASIETGKVPRPEDTLTYADLD	EDTLTYADLDMVHLSRAQPAPKPEPSFSEY	G	K	V	L	S	R	1	1	0	3	0	0	1	0	1	0	3	1	1	0	2	1	2	0	1	2	0	0	20		2299.15
pep3249	LVYDQELLGPSDKSEAAL	0.00896044	0.016819	0.0126249	0.0495008	0.0565959	0.0354869	3.68666	1.88231	0.00648183	2.1883	1	Q8R404	MIC13_MOUSE	MICOS complex subunit MIC13	Micos13 Mic13 Qil1	MRFLIKGSVAGGAVYLVYDQELLGPSDKSE	DQELLGPSDKSEAALRKAEEVVPPAMYQFS	Y	L	V	A	L	R	2	0	0	2	0	1	2	1	0	0	4	1	0	0	1	2	0	0	1	1	0	0	18		1946.98
pep268	AEFPSKVSTRTSSPAQG	0.00349901	0.00656775	0.00492995	0.0202255	0.0210786	0.0138575	3.67825	1.87902	0.00541065	2.26675	1	Q9DCU2	PLLP_MOUSE	Plasmolipin (Plasma membrane proteolipid)	Pllp Plapi Pmlp Tm4sf11	______________________________	FPSKVSTRTSSPAQGVGASVSALRPDLGFV	M	A	E	Q	G	V	2	1	0	0	0	1	1	1	0	0	0	1	0	1	2	4	2	0	0	1	0	0	17		1748.87
pep4865	SAYSSYSAPVSSSLSVRRS	0.00642332	0.0120568	0.00905018	0.0437445	0.0320172	0.0254389	3.67598	1.87813	0.0117949	1.92831	1	P08551	NFL_MOUSE	Neurofilament light polypeptide (NF-L) (68 kDa neurofilament protein) (Neurofilament triplet L protein)	Nefl Nf68 Nfl	RVHISSVRSGYSTARSAYSSYSAPVSSSLS	SYSAPVSSSLSVRRSYSSSSGSLMPSLENL	R	S	A	R	S	Y	2	2	0	0	0	0	0	0	0	0	1	0	0	0	1	9	0	0	2	2	0	0	19		1989.98
pep5718	TANALALAMERDGSSGGVIRL	0.00381029	0.00715203	0.00536853	0.0169747	0.0221947	0.020315	3.64246	1.86491	0.00134652	2.87079	1	Q60692	PSB6_MOUSE	Proteasome subunit beta type-6 (EC 3.4.25.1) (Low molecular mass protein 19) (Macropain delta chain) (Multicatalytic endopeptidase complex delta chain) (Proteasome delta chain) (Proteasome subunit Y)	Psmb6 Lmp19	ATYREGMTKDECLQFTANALALAMERDGSS	LAMERDGSSGGVIRLAAIQESGVERQVLLG	F	T	A	R	L	A	4	2	1	1	0	0	1	3	0	1	3	0	1	0	0	2	1	0	0	1	0	0	21		2101.09
pep4351	RAAVPSGASTGIYEA	0.00523439	0.00982511	0.00737503	0.0292682	0.0256085	0.0266486	3.63392	1.86153	0.000328752	3.48313	1	P17183	ENOG_MOUSE	Gamma-enolase (EC 4.2.1.11) (2-phospho-D-glycerate hydro-lyase) (Enolase 2) (Neural enolase) (Neuron-specific enolase) (NSE)	Eno2 Eno-2	NPTVEVDLYTAKGLFRAAVPSGASTGIYEA	RAAVPSGASTGIYEALELRDGDKQRYLGKG	F	R	A	E	A	L	4	1	0	0	0	0	1	2	0	1	0	0	0	0	1	2	1	0	1	1	0	0	15		1448.73
pep6109	TTRKTPQGPPEIYSDTQFPSLQ	0.00575487	0.0108021	0.00810837	0.0351759	0.0309316	0.0227916	3.60422	1.84969	0.00543861	2.26451	1	Q4VAA2	CDV3_MOUSE	Protein CDV3 (Carnitine deficiency-associated protein 3) (Tyrosine-phosphorylated protein 36) (TPP36)	Cdv3	AMPSGVYRPPGARLTTTRKTPQGPPEIYSD	GPPEIYSDTQFPSLQSTAKHVESRKDKEME	T	T	T	L	Q	S	0	1	0	1	0	3	1	1	0	1	1	1	0	1	4	2	4	0	1	0	0	0	22		2490.24
pep4218	PVLPGAYQQSHSQGYGY	0.0101183	0.0189925	0.0142563	0.045077	0.0505305	0.0603132	3.59536	1.84614	0.00187564	2.72685	1	Q9DC07	LNEBL_MOUSE	LIM zinc-binding domain-containing Nebulette (Actin-binding Z-disk protein)	Nebl Lnebl	PHVVEMDRRPGIIVAPVLPGAYQQSHSQGY	LPGAYQQSHSQGYGYMHQTSVSSMRSMQPP	A	P	V	G	Y	M	1	0	0	0	0	3	0	3	1	0	1	0	0	0	2	2	0	0	3	1	0	0	17		1850.86
pep2533	IREEYPDRIM	0.00778023	0.0146037	0.010962	0.042111	0.0380637	0.0396763	3.59417	1.84566	0.00023116	3.63609	1	P68372	TBB4B_MOUSE	Tubulin beta-4B chain (Tubulin beta-2C chain)	Tubb4b Tubb2c	GGGTGSGMGTLLISKIREEYPDRIMNTFSV	LLISKIREEYPDRIMNTFSVVPSPKVSDTV	K	I	R	I	M	N	0	2	0	1	0	0	2	0	0	2	0	0	1	0	1	0	0	0	1	0	0	0	10		1320.65
pep5784	TELSMQDEELMKRVQQSSGPA	0.00849664	0.0159485	0.0119714	0.0451211	0.0415687	0.0440918	3.59127	1.84449	0.000194898	3.71019	1	P62073	TIM10_MOUSE	Mitochondrial import inner membrane translocase subunit Tim10	Timm10 Tim10	VSKYLDIHERMGKKLTELSMQDEELMKRVQ	DEELMKRVQQSSGPA_______________	L	T	E	P	A	-	1	1	0	1	0	3	3	1	0	0	2	1	2	0	1	3	1	0	0	1	0	0	21		2363.11
pep5056	SGTNNVAQARKLVE	0.00383903	0.00720598	0.00540902	0.0211504	0.0187819	0.0191372	3.58997	1.84397	0.000311628	3.50636	1	Q61016	GBG7_MOUSE	Guanine nucleotide-binding protein G(I)/G(S)/G(O) subunit gamma-7	Gng7 Gngt7	______________________________	MSGTNNVAQARKLVEQLRIEAGIERIKVSK	M	S	G	V	E	Q	2	1	2	0	0	1	1	1	0	0	1	1	0	0	0	1	1	0	0	2	0	0	14		1485.79
pep1282	DKVPKTAENF	0.00864955	0.0162355	0.0121869	0.0505648	0.0477858	0.0342557	3.577	1.83875	0.00440361	2.35619	1	P17742	PPIA_MOUSE	Peptidyl-prolyl cis-trans isomerase A (PPIase A) (EC 5.2.1.8) (Cyclophilin A) (Cyclosporin A-binding protein) (Rotamase A) (SP18) [Cleaved into: Peptidyl-prolyl cis-trans isomerase A, N-terminally processed]	Ppia	ADDEPLGRVSFELFADKVPKTAENFRALST	FELFADKVPKTAENFRALSTGEKGFGYKGS	A	D	K	N	F	R	1	0	1	1	0	0	1	0	0	0	0	2	0	1	1	0	1	0	0	1	0	0	10		1147.59
pep6459	VPPVQVSPLIK	0.00629112	0.0118086	0.00886391	0.0365326	0.0307784	0.028828	3.56551	1.83411	0.00119987	2.92086	1	Q06185	ATP5I_MOUSE	ATP synthase subunit e, mitochondrial (ATPase subunit e) (ATP synthase membrane subunit e)	Atp5me Atp5i Atp5k Lfm-1 Lfm1	______________________________	______________________________	M	V	P	I	K	F	0	0	0	0	0	1	0	0	0	1	1	1	0	0	3	1	0	0	0	3	0	0	11		1175.73
pep5949	TMFGEKLNGTDPEDVIRNAF	0.00312757	0.00587055	0.00440661	0.0139332	0.0175742	0.0162587	3.56338	1.83324	0.00099075	3.00404	1	Q9CQ19	MYL9_MOUSE	Myosin regulatory light polypeptide 9 (Myosin regulatory light chain 2, smooth muscle isoform) (Myosin regulatory light chain 9)	Myl9 Myrl2	MMNEAPGPINFTMFLTMFGEKLNGTDPEDV	KLNGTDPEDVIRNAFACFDEEASGFIHEDH	L	T	M	A	F	A	1	1	2	2	0	0	2	2	0	1	1	1	1	2	1	0	2	0	0	1	0	0	20		2253.07
pep764	APVISAEKAYHEQLS	0.00398818	0.00748593	0.00561917	0.0214215	0.0231858	0.0157948	3.53367	1.82117	0.00412983	2.38407	1	P68369	TBA1A_MOUSE	Tubulin alpha-1A chain (Alpha-tubulin 1) (Alpha-tubulin isotype M-alpha-1) (Tubulin alpha-1 chain) [Cleaved into: Detyrosinated tubulin alpha-1A chain]	Tuba1a Tuba1	NLVPYPRIHFPLATYAPVISAEKAYHEQLS	APVISAEKAYHEQLSVAEITNACFEPANQM	Y	A	P	L	S	V	3	0	0	0	0	1	2	0	1	1	1	1	0	0	1	2	0	0	1	1	0	0	15		1641.84
pep6514	VTEAAEKTKEGVLY	0.00508236	0.00953976	0.00716083	0.026746	0.0248648	0.0252329	3.52769	1.81873	0.000201308	3.69614	1	Q91ZZ3	SYUB_MOUSE	Beta-synuclein	Sncb	AKEGVVAAAEKTKQGVTEAAEKTKEGVLYV	GVTEAAEKTKEGVLYVGSKTSGVVQGVASV	G	V	T	L	Y	V	2	0	0	0	0	0	3	1	0	0	1	2	0	0	0	0	2	0	1	2	0	0	14		1536.8
pep4960	SFASLFSD	0.00322241	0.00604857	0.00454024	0.0143558	0.0203858	0.0139419	3.52492	1.81759	0.00653036	2.18506	1	O88935	SYN1_MOUSE	Synapsin-1 (Synapsin I)	Syn1 Syn-1	SQDEVKAETIRSLRKSFASLFSD_______	TIRSLRKSFASLFSD_______________	K	S	F	S	D	-	1	0	0	1	0	0	0	0	0	0	1	0	0	2	0	3	0	0	0	0	0	0	8		872.392
pep6239	VEVMPQNQKAIGNALK	0.00506076	0.00949921	0.00713039	0.0287716	0.0247591	0.0227296	3.51586	1.81388	0.00114722	2.94035	1	Q9DCX2	ATP5H_MOUSE	ATP synthase subunit d, mitochondrial (ATPase subunit d) (ATP synthase peripheral stalk subunit d)	Atp5pd Atp5h	AGRKLALKTIDWVSFVEVMPQNQKAIGNAL	EVMPQNQKAIGNALKSWNETFHARLASLSE	F	V	E	L	K	S	2	0	2	0	0	2	1	1	0	1	1	2	1	0	1	0	0	0	0	2	0	0	16		1738.94
pep6415	VNHPQVSALLGEEDEEALHYLTR	0.00770431	0.0144612	0.0108551	0.0343225	0.0399653	0.041521	3.50717	1.81031	0.000709631	3.14897	1	Q9EQU5	SET_MOUSE	Protein SET (Phosphatase 2A inhibitor I2PP2A) (I-2PP2A) (Template-activating factor I) (TAF-I)	Set	SELIAKIPNFWVTTFVNHPQVSALLGEEDE	LLGEEDEEALHYLTRVEVTEFEDIKSGYRI	F	V	N	T	R	V	2	1	1	1	0	1	4	1	2	0	4	0	0	0	1	1	1	0	1	2	0	0	23		2619.29
pep3809	NQLDKADIAVPLVF	0.0412841	0.0154983	0.0116335	0.0944011	0.094792	0.0499359	3.49523	1.80539	0.0316396	1.49977	1	Q7TSJ2	MAP6_MOUSE	Microtubule-associated protein 6 (MAP-6) (Stable tubule-only polypeptide) (STOP)	Map6 Mtap6	AWPCITRACCIARFWNQLDKADIAVPLVFT	WNQLDKADIAVPLVFTKYSEATEHPGAPPQ	W	N	Q	V	F	T	2	0	1	2	0	1	0	0	0	1	2	1	0	1	1	0	0	0	0	2	0	0	14		1541.85
pep5483	SSFFSSLSQAVKQTAASAGLVD	0.00565855	0.0106213	0.00797265	0.0252087	0.0327692	0.0267212	3.49239	1.80421	0.00176822	2.75246	1	Q64332	SYN2_MOUSE	Synapsin-2 (Synapsin II)	Syn2	APQPAPQPAPTPSVGSSFFSSLSQAVKQTA	SQAVKQTAASAGLVDAPAPSAASRKAKVLL	G	S	S	V	D	A	4	0	0	1	0	2	0	1	0	0	2	1	0	2	0	6	1	0	0	2	0	0	22		2200.1
pep3516	MNNQKQQKPTLS	0.00864063	0.0162187	0.0121743	0.0432015	0.0513742	0.0342204	3.47781	1.79818	0.00484103	2.31506	1	Q9CQC6	BZW1_MOUSE	Basic leucine zipper and W2 domain-containing protein 1	Bzw1	______________________________	______________________________	-	M	N	L	S	G	0	0	2	0	0	3	0	0	0	0	1	2	1	0	1	1	1	0	0	0	0	0	12		1415.72
pep4170	PSGFTLDDAIQTGVDNPGHPYIMTV	0.00746825	0.0140182	0.0105224	0.0332709	0.0415556	0.0358782	3.45856	1.79017	0.00105859	2.97527	1	Q04447	KCRB_MOUSE	Creatine kinase B-type (EC 2.7.3.2) (B-CK) (Creatine kinase B chain) (Creatine phosphokinase B-type) (CPK-B)	Ckb Ckbb	VLTPELYAELRAKCTPSGFTLDDAIQTGVD	QTGVDNPGHPYIMTVGAVAGDEESYDVFKD	T	P	S	T	V	G	1	0	1	3	0	1	0	3	1	2	1	0	1	1	3	1	3	0	1	2	0	0	25		2644.25
pep3408	MESMLNKLKSTVTK	0.00454117	0.00852392	0.00639831	0.0251314	0.0240221	0.0179848	3.44947	1.78637	0.00314312	2.50264	1	Q8CFE4	SCYL2_MOUSE	SCY1-like protein 2 (Coated vesicle-associated kinase of 104 kDa)	Scyl2 Cvak104 D10Ertd802e	______________________________	______________________________	-	M	E	T	K	V	0	0	1	0	0	0	1	0	0	0	2	3	2	0	0	2	2	0	0	1	0	0	14		1608.86
pep4389	RAWPLPRRGDHPWIPKPVQIPATS	0.0113898	0.0213791	0.0160478	0.0526531	0.0557232	0.0597244	3.44351	1.78388	0.000357165	3.44713	1	Q7TSJ2	MAP6_MOUSE	Microtubule-associated protein 6 (MAP-6) (Stable tubule-only polypeptide) (STOP)	Map6 Mtap6	SDAPFERETQYQKDFRAWPLPRRGDHPWIP	DHPWIPKPVQIPATSQPSQPVLGVPKRRPQ	F	R	A	T	S	Q	2	3	0	1	0	1	0	1	1	2	1	1	0	0	6	1	1	2	0	1	0	0	24		2774.52
pep5904	TLASHHPADFTPA	0.00754545	0.0141631	0.0106312	0.0336148	0.0469024	0.0305879	3.43556	1.78055	0.00806844	2.09321	1	P01942	HBA_MOUSE	Hemoglobin subunit alpha (Alpha-globin) (Hemoglobin alpha chain)	Hba Hba-a1	VDPVNFKLLSHCLLVTLASHHPADFTPAVH	LVTLASHHPADFTPAVHASLDKFLASVSTV	V	T	L	P	A	V	3	0	0	1	0	0	0	0	2	0	1	0	0	1	2	1	2	0	0	0	0	0	13		1363.65
pep3332	MDVFMKGLSKAKEGVVAAAEKTKQG	0.0816752	0.0158962	0.0596608	0.21108	0.209424	0.119476	3.43429	1.78001	0.0237377	1.62456	1	O55042	SYUA_MOUSE	Alpha-synuclein (Non-A beta component of AD amyloid) (Non-A4 component of amyloid precursor) (NACP)	Snca Syn	______________________________	AKEGVVAAAEKTKQGVAEAAGKTKEGVLYV	-	M	D	Q	G	V	4	0	0	1	0	1	2	3	0	0	1	5	2	1	0	1	1	0	0	3	0	0	25		2622.39
pep389	AGLGHPSAF	0.00538661	0.0101108	0.0075895	0.0308241	0.0263533	0.0219894	3.42907	1.77782	0.00295294	2.52975	1	Q9CWS0	DDAH1_MOUSE	N(G),N(G)-dimethylarginine dimethylaminohydrolase 1 (DDAH-1) (Dimethylarginine dimethylaminohydrolase 1) (EC 3.5.3.18) (DDAHI) (Dimethylargininase-1)	Ddah1	______________________________	______________________________	M	A	G	A	F	G	2	0	0	0	0	0	0	2	1	0	1	0	0	1	1	1	0	0	0	0	0	0	9		855.424
pep1715	FSDIYKIREIADGL	0.00525609	0.00986585	0.00740561	0.0234157	0.027593	0.0258365	3.41117	1.77027	0.000549347	3.26015	1	P63028	TCTP_MOUSE	Translationally-controlled tumor protein (TCTP) (21 kDa polypeptide) (p21) (p23)	Tpt1 Trt	______________________________	LFSDIYKIREIADGLCLEVEGKMVSRTEGA	L	F	S	G	L	C	1	1	0	2	0	0	1	1	0	3	1	1	0	1	0	1	0	0	1	0	0	0	14		1638.86
pep1646	FLKGGGGGGGGGGLGGGLGN	0.00543289	0.0101977	0.00765471	0.0269773	0.0265797	0.0257105	3.40419	1.76731	0.000197115	3.70528	1	O88456	CPNS1_MOUSE	Calpain small subunit 1 (CSS1) (Calcium-activated neutral proteinase small subunit) (CANP small subunit) (Calcium-dependent protease small subunit) (CDPS) (Calcium-dependent protease small subunit 1) (Calpain regulatory subunit)	Capns1 Capn4	______________________________	GGGGGGGGLGGGLGNVLGGLISGAAGGGGG	S	F	L	G	N	V	0	0	1	0	0	0	0	14	0	0	3	1	0	1	0	0	0	0	0	0	0	0	20		1544.77
pep1931	GHKLGLGLEFQA	0.00386866	0.0072616	0.0272539	0.0292342	0.0508069	0.0501714	3.39235	1.76229	0.0395746	1.40258	1	Q60932	VDAC1_MOUSE	Voltage-dependent anion-selective channel protein 1 (VDAC-1) (mVDAC1) (Outer mitochondrial membrane protein porin 1) (Plasmalemmal porin) (Voltage-dependent anion-selective channel protein 5) (VDAC-5) (mVDAC5)	Vdac1 Vdac5	LTLSALLDGKNVNAGGHKLGLGLEFQA___	NAGGHKLGLGLEFQA_______________	G	G	H	Q	A	-	1	0	0	0	0	1	1	3	1	0	3	1	0	1	0	0	0	0	0	0	0	0	12		1268.69
pep2044	GNLPFNTV	0.00328019	0.00615702	0.0231082	0.0376081	0.0321147	0.0402611	3.3794	1.75677	0.0176821	1.75247	1	Q9WUK2	IF4H_MOUSE	Eukaryotic translation initiation factor 4H (eIF-4H) (Williams-Beuren syndrome chromosomal region 1 protein homolog)	Eif4h Wbscr1	SQKELPTEPPYTAYVGNLPFNTVQGDIDAI	PPYTAYVGNLPFNTVQGDIDAIFKDLSIRS	V	G	N	T	V	Q	0	0	2	0	0	0	0	1	0	0	1	0	0	1	1	0	1	0	0	1	0	0	8		860.439
pep2461	IGSLDNITHVPGGGN	0.00469418	0.00881113	0.0066139	0.0219429	0.0229656	0.0230656	3.37857	1.75641	0.000212057	3.67355	1	P10637	TAU_MOUSE	Microtubule-associated protein tau (Neurofibrillary tangle protein) (Paired helical filament-tau) (PHF-tau)	Mapt Mtapt Tau	VKSEKLDFKDRVQSKIGSLDNITHVPGGGN	IGSLDNITHVPGGGNKKIETHKLTFRENAK	K	I	G	G	N	K	0	0	2	1	0	0	0	4	1	2	1	0	0	0	1	1	1	0	0	1	0	0	15		1449.72
pep5098	SHSSTFDAGAGIALNDNF	0.00459884	0.00863218	0.00647957	0.0204877	0.0251271	0.0209261	3.3759	1.75527	0.00115525	2.93733	1	P16858	G3P_MOUSE	Glyceraldehyde-3-phosphate dehydrogenase (GAPDH) (EC 1.2.1.12) (Peptidyl-cysteine S-nitrosylase GAPDH) (EC 2.6.99.-)	Gapdh Gapd	GYTEDQVVSCDFNSNSHSSTFDAGAGIALN	STFDAGAGIALNDNFVKLISWYDNEYGYSN	N	S	H	N	F	V	3	0	2	2	0	0	0	2	1	1	1	0	0	2	0	3	1	0	0	0	0	0	18		1822.81
pep5275	SLSQAVKQTAASAGLVD	0.00445078	0.00835427	0.00627097	0.0198281	0.0228124	0.0217429	3.3751	1.75493	0.000449937	3.34685	1	Q64332	SYN2_MOUSE	Synapsin-2 (Synapsin II)	Syn2	PQPAPTPSVGSSFFSSLSQAVKQTAASAGL	SQAVKQTAASAGLVDAPAPSAASRKAKVLL	S	S	L	V	D	A	4	0	0	1	0	2	0	1	0	0	2	1	0	0	0	3	1	0	0	2	0	0	17		1644.87
pep6421	VNPTVFFD	0.0035658	0.00669312	0.00502406	0.0158855	0.0181633	0.0169813	3.33901	1.73942	0.000438131	3.3584	1	P17742	PPIA_MOUSE	Peptidyl-prolyl cis-trans isomerase A (PPIase A) (EC 5.2.1.8) (Cyclophilin A) (Cyclosporin A-binding protein) (Rotamase A) (SP18) [Cleaved into: Peptidyl-prolyl cis-trans isomerase A, N-terminally processed]	Ppia	______________________________	______________________________	M	V	N	F	D	I	0	0	1	1	0	0	0	0	0	0	0	0	0	2	1	0	1	0	0	2	0	0	8		937.455
pep6031	TQRIVAPPGGRANITS	0.020419	0.0383272	0.0287696	0.0909663	0.110399	0.0898908	3.32804	1.73467	0.00129296	2.88842	1	O08553	DPYL2_MOUSE	Dihydropyrimidinase-related protein 2 (DRP-2) (Unc-33-like phosphoprotein 2) (ULIP-2)	Dpysl2 Crmp2 Ulip2	SLSGAQIDDNIPRRTTQRIVAPPGGRANIT	QRIVAPPGGRANITSLG_____________	T	T	Q	T	S	L	2	2	1	0	0	1	0	2	0	2	0	0	0	0	2	1	2	0	0	1	0	0	16		1636.9
pep533	AKTEWLDGKHVVFG	0.00496324	0.00931617	0.006993	0.0251071	0.024282	0.0211852	3.31764	1.73016	0.000691444	3.16024	1	P17742	PPIA_MOUSE	Peptidyl-prolyl cis-trans isomerase A (PPIase A) (EC 5.2.1.8) (Cyclophilin A) (Cyclosporin A-binding protein) (Rotamase A) (SP18) [Cleaved into: Peptidyl-prolyl cis-trans isomerase A, N-terminally processed]	Ppia	NAGPNTNGSQFFICTAKTEWLDGKHVVFGK	TAKTEWLDGKHVVFGKVKEGMNIVEAMERF	T	A	K	F	G	K	1	0	0	1	0	0	1	2	1	0	1	2	0	1	0	0	1	1	0	2	0	0	14		1585.83
pep4727	RTGDTGMLPANYVEAI	0.00469765	0.00881764	0.00661879	0.0213133	0.0229826	0.022476	3.31637	1.7296	0.000270829	3.5673	1	Q61792	LASP1_MOUSE	LIM and SH3 domain protein 1 (LASP-1) (Metastatic lymph node gene 50 protein) (MLN 50)	Lasp1 Mln50	NVQQIDDGWMYGTVERTGDTGMLPANYVEA	TGDTGMLPANYVEAI_______________	E	R	T	A	I	-	2	1	1	1	0	0	1	2	0	1	1	0	1	0	1	0	2	0	1	1	0	0	16		1706.83
pep5956	TMVADTPENLRLKQQSELQSQVRY	0.00552932	0.0518935	0.0599338	0.108675	0.157657	0.119323	3.28618	1.71641	0.0166041	1.77979	1	Q61792	LASP1_MOUSE	LIM and SH3 domain protein 1 (LASP-1) (Metastatic lymph node gene 50 protein) (MLN 50)	Lasp1 Mln50	EKKPYCNAHYPKQSFTMVADTPENLRLKQQ	LRLKQQSELQSQVRYKEEFEKNKGKGFSVV	F	T	M	R	Y	K	1	2	1	1	0	4	2	0	0	0	3	1	1	0	1	2	2	0	1	2	0	0	24		2833.44
pep5656	SVVPSPKVSDTVVEPYN	0.0772304	0.0289928	0.0217629	0.122842	0.167834	0.122777	3.23046	1.69174	0.014379	1.84227	1	P68372	TBB4B_MOUSE	Tubulin beta-4B chain (Tubulin beta-2C chain)	Tubb4b Tubb2c	SKIREEYPDRIMNTFSVVPSPKVSDTVVEP	VPSPKVSDTVVEPYNATLSVHQLVENTDET	F	S	V	Y	N	A	0	0	1	1	0	0	1	0	0	0	0	1	0	0	3	3	1	0	1	5	0	0	17		1815.93
pep2051	GNPKATPPQIVNGNH	0.0174123	0.0408208	0.00490663	0.0760392	0.0705934	0.0571576	3.22761	1.69047	0.0170939	1.76716	1	Q91VW3	SH3L3_MOUSE	SH3 domain-binding glutamic acid-rich-like protein 3	Sh3bgrl3	ISQDNALRDEMRTLAGNPKATPPQIVNGNH	GNPKATPPQIVNGNHYCGDYELFVEAVEQD	A	G	N	N	H	Y	1	0	3	0	0	1	0	2	1	1	0	1	0	0	3	0	1	0	0	1	0	0	15		1542.79
pep1702	FQMPDQGMTSADDFFQGTKA	0.00379255	0.00711873	0.00534354	0.0177712	0.0185545	0.0161103	3.22588	1.68969	0.000553101	3.2572	1	O08553	DPYL2_MOUSE	Dihydropyrimidinase-related protein 2 (DRP-2) (Unc-33-like phosphoprotein 2) (ULIP-2)	Dpysl2 Crmp2 Ulip2	HSRMVIPGGIDVHTRFQMPDQGMTSADDFF	QGMTSADDFFQGTKAALAGGTTMIIDHVVP	R	F	Q	K	A	A	2	0	0	3	0	3	0	2	0	0	0	1	2	3	1	1	2	0	0	0	0	0	20		2220.95
pep3197	LSRAQPAPKPEPSFSEYASVQ	0.00852181	0.0159957	0.0120069	0.0393353	0.0416918	0.0365988	3.22048	1.68727	0.000492574	3.30753	1	P97797	SHPS1_MOUSE	Tyrosine-protein phosphatase non-receptor type substrate 1 (SHP substrate 1) (SHPS-1) (Brain Ig-like molecule with tyrosine-based activation motifs) (Bit) (CD172 antigen-like family member A) (Inhibitory receptor SHPS-1) (MyD-1 antigen) (Signal-regulatory protein alpha-1) (Sirp-alpha-1) (mSIRP-alpha1) (p84) (CD antigen CD172a)	Sirpa Bit Myd1 Ptpns1 Shps1 Sirp	RPEDTLTYADLDMVHLSRAQPAPKPEPSFS	APKPEPSFSEYASVQVQRK___________	H	L	S	V	Q	V	3	1	0	0	0	2	2	0	0	0	1	1	0	1	4	4	0	0	1	1	0	0	21		2288.14
pep5340	SPGSSGGGGFF	0.00569244	0.0106849	0.0080204	0.0271963	0.0278495	0.0226982	3.18652	1.67198	0.00120488	2.91906	1	O88935	SYN1_MOUSE	Synapsin-1 (Synapsin I)	Syn1 Syn-1	ERASTAAPVASPAAPSPGSSGGGGFFSSLS	PAAPSPGSSGGGGFFSSLSNAVKQTTAAAA	P	S	P	F	F	S	0	0	0	0	0	0	0	5	0	0	0	0	0	2	1	3	0	0	0	0	0	0	11		955.404
pep5942	TMDKSELVQK	0.00547679	0.0102801	0.00771657	0.0254877	0.0274529	0.0216903	3.17937	1.66874	0.00146135	2.83524	1	Q9CQV8	1433B_MOUSE	14-3-3 protein beta/alpha (Protein kinase C inhibitor protein 1) (KCIP-1) [Cleaved into: 14-3-3 protein beta/alpha, N-terminally processed]	Ywhab	______________________________	______________________________	M	T	M	Q	K	A	0	0	0	1	0	1	1	0	0	0	1	2	1	0	0	1	1	0	0	1	0	0	10		1177.6
pep3241	LVPEPKIIDAALRA	0.036159	0.010031	0.037648	0.0735359	0.0711704	0.120732	3.16609	1.6627	0.0305488	1.51501	1	P12787	COX5A_MOUSE	Cytochrome c oxidase subunit 5A, mitochondrial (Cytochrome c oxidase polypeptide Va)	Cox5a	AWELRKGMNTLVGYDLVPEPKIIDAALRAC	DLVPEPKIIDAALRACRRLNDFASAVRILE	D	L	V	R	A	C	3	1	0	1	0	0	1	0	0	2	2	1	0	0	2	0	0	0	0	1	0	0	14		1504.9
pep2954	LEDLKSFVKNQ	0.0204042	0.0373134	0.00560171	0.0593815	0.0539584	0.0856598	3.1428	1.65205	0.0279584	1.55349	1	O35658	C1QBP_MOUSE	Complement component 1 Q subcomponent-binding protein, mitochondrial (GC1q-R protein) (Glycoprotein gC1qBP) (C1qBP)	C1qbp Gc1qbp	VELSTALEHQEYITFLEDLKSFVKNQ____	YITFLEDLKSFVKNQ_______________	F	L	E	N	Q	-	0	0	1	1	0	1	1	0	0	0	2	2	0	1	0	1	0	0	0	1	0	0	11		1319.71
pep4482	RHRDTGILDSIGRFF	0.0239654	0.00899677	0.0402654	0.0991472	0.0539293	0.0733123	3.09158	1.62834	0.0326116	1.48663	1	P04370	MBP_MOUSE	Myelin basic protein (MBP) (Myelin A1 protein)	Mbp Shi	ATASTMDHARHGFLPRHRDTGILDSIGRFF	RHRDTGILDSIGRFFSGDRGAPKRGSGKDS	P	R	H	F	F	S	0	3	0	2	0	0	0	2	1	2	1	0	0	2	0	1	1	0	0	0	0	0	15		1788.94
pep3236	LVGYDLVPEPKIIDAALRA	0.093731	0.0258844	0.0971482	0.260082	0.180256	0.216326	3.0294	1.59903	0.0109879	1.95909	1	P12787	COX5A_MOUSE	Cytochrome c oxidase subunit 5A, mitochondrial (Cytochrome c oxidase polypeptide Va)	Cox5a	KPDIDAWELRKGMNTLVGYDLVPEPKIIDA	DLVPEPKIIDAALRACRRLNDFASAVRILE	T	L	V	R	A	C	3	1	0	2	0	0	1	1	0	2	3	1	0	0	2	0	0	0	1	2	0	0	19		2052.16
pep5810	TGEKGFGYKGSSF	0.0345709	0.0129781	0.00974177	0.0709708	0.0534251	0.0485857	3.01936	1.59424	0.0203234	1.692	1	P17742	PPIA_MOUSE	Peptidyl-prolyl cis-trans isomerase A (PPIase A) (EC 5.2.1.8) (Cyclophilin A) (Cyclosporin A-binding protein) (Rotamase A) (SP18) [Cleaved into: Peptidyl-prolyl cis-trans isomerase A, N-terminally processed]	Ppia	ADKVPKTAENFRALSTGEKGFGYKGSSFHR	LSTGEKGFGYKGSSFHRIIPGFMCQGGDFT	S	T	G	S	F	H	0	0	0	0	0	0	1	4	0	0	0	2	0	2	0	2	1	0	1	0	0	0	13		1363.64
pep5601	SVAGLKKQFHKATQKV	0.0543081	0.102329	0.0504284	0.153752	0.198268	0.264327	2.97658	1.57366	0.0196253	1.70718	1	Q62420	SH3G2_MOUSE	Endophilin-A1 (Endophilin-1) (SH3 domain protein 2A) (SH3 domain-containing GRB2-like protein 2) (SH3p4)	Sh3gl2 Een1 Sh3d2a	______________________________	VAGLKKQFHKATQKVSEKVGGAEGTKLDDD	M	S	V	K	V	S	2	0	0	0	0	2	0	1	1	0	1	4	0	1	0	1	1	0	0	2	0	0	16		1769.03
pep6775	YTQKAPQVSTPTLVEA	0.00635652	0.0119314	0.0447803	0.0505471	0.061425	0.0746899	2.95968	1.56544	0.0411482	1.38565	1	P07724	ALBU_MOUSE	Albumin	Alb Alb-1 Alb1	EKLGEYGFQNAILVRYTQKAPQVSTPTLVE	TQKAPQVSTPTLVEAARNLGRVGTKCCTLP	R	Y	T	E	A	A	2	0	0	0	0	2	1	0	0	0	1	1	0	0	2	1	3	0	1	2	0	0	16		1731.9
pep1329	DPGKLYTL	0.0734447	0.137858	0.517403	0.647678	0.667195	0.781045	2.87622	1.52417	0.0344665	1.4626	1	P70296	PEBP1_MOUSE	Phosphatidylethanolamine-binding protein 1 (PEBP-1) (HCNPpp) [Cleaved into: Hippocampal cholinergic neurostimulating peptide (HCNP)]	Pebp1 Pbp Pebp	TQVMNRPSSISWDGLDPGKLYTLVLTDPDA	SISWDGLDPGKLYTLVLTDPDAPSRKDPKF	L	D	P	T	L	V	0	0	0	1	0	0	0	1	0	0	2	1	0	0	1	0	1	0	1	0	0	0	8		905.486
pep2213	GVTVDELGKVLTPTQVMNRPSSISW	0.00535727	0.0100558	0.0377409	0.0463485	0.0487463	0.0572282	2.8657	1.51889	0.0358643	1.44534	1	P70296	PEBP1_MOUSE	Phosphatidylethanolamine-binding protein 1 (PEBP-1) (HCNPpp) [Cleaved into: Hippocampal cholinergic neurostimulating peptide (HCNP)]	Pebp1 Pbp Pebp	EVDEPPQHALRVDYAGVTVDELGKVLTPTQ	LTPTQVMNRPSSISWDGLDPGKLYTLVLTD	A	G	V	S	W	D	0	1	1	1	0	1	1	2	0	1	2	1	1	0	2	3	3	1	0	4	0	0	25		2713.41
pep944	ASNNTASIAQARKLVEQLK	0.0757687	0.0284441	0.021351	0.132891	0.11837	0.10289	2.82049	1.49594	0.0164195	1.78464	1	P63213	GBG2_MOUSE	Guanine nucleotide-binding protein G(I)/G(S)/G(O) subunit gamma-2 (G gamma-I)	Gng2	______________________________	TASIAQARKLVEQLKMEANIDRIKVSKAAA	M	A	S	L	K	M	4	1	2	0	0	2	1	0	0	1	2	2	0	0	0	2	1	0	0	1	0	0	19		2041.13
pep5238	SLPQHVMEPPVGAAAAGTSG	0.0202104	0.00758713	0.00569513	0.0351318	0.0357355	0.0235746	2.81978	1.49558	0.0281272	1.55087	1	Q6PE13	PRRT3_MOUSE	Proline-rich transmembrane protein 3	Prrt3	LRGRCRSLTEVCLRTSLPQHVMEPPVGAAA	VMEPPVGAAAAGTSGSSLDSFSKGSLKISW	T	S	L	S	G	S	4	0	0	0	0	1	1	3	1	0	1	0	1	0	3	2	1	0	0	2	0	0	20		1875.91
pep4749	RTQDENPVVHFFKNIV	0.0233827	0.00877802	0.00658905	0.0468297	0.0251232	0.0369411	2.81018	1.49066	0.0462431	1.33495	1	P04370	MBP_MOUSE	Myelin basic protein (MBP) (Myelin A1 protein)	Mbp Shi	RTTHYGSLPQKSQHGRTQDENPVVHFFKNI	TQDENPVVHFFKNIVTPRTPPPSQGKGGRD	G	R	T	I	V	T	0	1	2	1	0	1	1	0	1	1	0	1	0	2	1	0	1	0	0	3	0	0	16		1942.01
pep1132	AVPGTQLSPSPTPATQSPKKPPA	0.12914	0.0675237	0.0962895	0.312894	0.181744	0.319714	2.7798	1.47498	0.0227865	1.64232	1	Q61548	AP180_MOUSE	Clathrin coat assembly protein AP180 (91 kDa synaptosomal-associated protein) (Clathrin coat-associated protein AP180) (Phosphoprotein F1-20)	Snap91	VMFAQPMMRPPFGAAAVPGTQLSPSPTPAT	PSPTPATQSPKKPPAKDPLADLNIKDFL__	A	A	V	P	A	K	3	0	0	0	0	2	0	1	0	0	1	2	0	0	7	3	3	0	0	1	0	0	23		2256.21
pep6458	VPPVQVSPL	0.00751989	0.0640703	0.0331002	0.0999022	0.0778176	0.111709	2.76462	1.46708	0.032311	1.49065	1	Q06185	ATP5I_MOUSE	ATP synthase subunit e, mitochondrial (ATPase subunit e) (ATP synthase membrane subunit e)	Atp5me Atp5i Atp5k Lfm-1 Lfm1	______________________________	______________________________	M	V	P	P	L	I	0	0	0	0	0	1	0	0	0	0	1	0	0	0	3	1	0	0	0	3	0	0	9		934.549
pep997	ASTMDHARHGFLPRH	0.0472857	0.0177514	0.0133247	0.0862864	0.0633935	0.0652938	2.74335	1.45594	0.0244648	1.61146	1	P04370	MBP_MOUSE	Myelin basic protein (MBP) (Myelin A1 protein)	Mbp Shi	ASQKRPSQRSKYLATASTMDHARHGFLPRH	ASTMDHARHGFLPRHRDTGILDSIGRFFSG	T	A	S	R	H	R	2	2	0	1	0	0	0	1	3	0	1	0	1	1	1	1	1	0	0	0	0	0	15		1731.84
pep3112	LPGPLQDM	0.166418	0.213754	0.297393	0.452006	0.775752	0.607331	2.70836	1.43742	0.0187875	1.72613	1	P63040	CPLX1_MOUSE	Complexin-1 (921-S) (Complexin I) (CPX I) (Synaphin-2)	Cplx1	PEEEDESILDTVIKYLPGPLQDMFKK____	LDTVIKYLPGPLQDMFKK____________	Y	L	P	D	M	F	0	0	0	1	0	1	0	1	0	0	2	0	1	0	2	0	0	0	0	0	0	0	8		869.432
pep5581	STMDHARHGFLPRHRDTGILDSIGR	0.0713735	0.0171208	0.0642568	0.173482	0.114181	0.12556	2.70521	1.43574	0.0251874	1.59882	1	P04370	MBP_MOUSE	Myelin basic protein (MBP) (Myelin A1 protein)	Mbp Shi	SQKRPSQRSKYLATASTMDHARHGFLPRHR	LPRHRDTGILDSIGRFFSGDRGAPKRGSGK	A	S	T	G	R	F	1	4	0	3	0	0	0	3	3	2	2	0	1	1	1	2	2	0	0	0	0	0	25		2844.43
pep6488	VRKPVVATISKGGYLQ	0.318495	0.0253413	0.208853	0.546266	0.566735	0.380114	2.70154	1.43378	0.0393285	1.40529	1	Q9WTR6	XCT_MOUSE	Cystine/glutamate transporter (Amino acid transport system xc-) (Solute carrier family 7 member 11) (xCT)	Slc7a11	______________________________	RKPVVATISKGGYLQGNMSGRLPSMGDQEP	M	V	R	L	Q	G	1	1	0	0	0	1	0	2	0	1	1	2	0	0	1	1	1	0	1	3	0	0	16		1715.01
pep2195	GVFDVSNA	0.0180044	0.00675897	0.00507349	0.0261561	0.0296851	0.0242375	2.68388	1.42432	0.018455	1.73389	1	Q04447	KCRB_MOUSE	Creatine kinase B-type (EC 2.7.3.2) (B-CK) (Creatine kinase B chain) (Creatine phosphokinase B-type) (CPK-B)	Ckb Ckbb	LQKRGTGGVDTAAVGGVFDVSNADRLGFSE	VDTAAVGGVFDVSNADRLGFSEVELVQMVV	G	G	V	N	A	D	1	0	1	1	0	0	0	1	0	0	0	0	0	1	0	1	0	0	0	2	0	0	8		807.376
pep6570	WDDYVPKLYEQLSGK	0.241438	0.217604	0.0326681	0.484456	0.341277	0.48884	2.67347	1.41871	0.0285613	1.54422	1	P70296	PEBP1_MOUSE	Phosphatidylethanolamine-binding protein 1 (PEBP-1) (HCNPpp) [Cleaved into: Hippocampal cholinergic neurostimulating peptide (HCNP)]	Pebp1 Pbp Pebp	YNLGAPVAGTCYQAEWDDYVPKLYEQLSGK	WDDYVPKLYEQLSGK_______________	E	W	D	G	K	-	0	0	0	2	0	1	1	1	0	0	2	2	0	0	1	1	0	1	2	1	0	0	15		1839.9
pep4900	SDVNPLSAVSSVVNK	0.0193621	0.00726866	0.00545608	0.0345428	0.0261462	0.0248463	2.66574	1.41454	0.0285708	1.54408	1	Q9QYX7	PCLO_MOUSE	Protein piccolo (Aczonin) (Brain-derived HLMN protein) (Multidomain presynaptic cytomatrix protein)	Pclo Acz	DFKEEYKSSMMPGFFSDVNPLSAVSSVVNK	SDVNPLSAVSSVVNKFNPFDLISDSEAVQE	F	S	D	N	K	F	1	0	2	1	0	0	0	0	0	0	1	1	0	0	1	4	0	0	0	4	0	0	15		1514.79
pep5631	SVMPSPKVSDTVVEPYNATLSVHQL	0.0349846	0.0131334	0.00985836	0.0585912	0.0457878	0.0489664	2.64496	1.40325	0.0223074	1.65155	1	Q7TMM9	TBB2A_MOUSE	Tubulin beta-2A chain	Tubb2a Tubb2	SKIREEYPDRIMNTFSVMPSPKVSDTVVEP	TVVEPYNATLSVHQLVENTDETYSIDNEAL	F	S	V	Q	L	V	1	0	1	1	0	1	1	0	1	0	2	1	1	0	3	4	2	0	1	5	0	0	25		2697.37
pep5645	SVQVVSAAAAAKVPEVELKDLSPSE	0.0347968	0.0129911	0.0487577	0.0850281	0.108872	0.0590611	2.62012	1.38963	0.0425267	1.37134	1	Q68FL4	SAHH3_MOUSE	Putative adenosylhomocysteinase 3 (AdoHcyase 3) (EC 3.3.1.1) (Long-IRBIT) (S-adenosyl-L-homocysteine hydrolase 3) (S-adenosylhomocysteine hydrolase-like protein 2)	Ahcyl2	______________________________	AKVPEVELKDLSPSEAEPQLGLSAAAVGAM	M	S	V	S	E	A	5	0	0	1	0	1	3	0	0	0	2	2	0	0	2	4	0	0	0	5	0	0	25		2523.34
pep6460	VPPVQVSPLIKF	0.355237	0.0847313	0.31801	0.538142	0.679413	0.765424	2.61614	1.38744	0.0191258	1.71838	1	Q06185	ATP5I_MOUSE	ATP synthase subunit e, mitochondrial (ATPase subunit e) (ATP synthase membrane subunit e)	Atp5me Atp5i Atp5k Lfm-1 Lfm1	______________________________	______________________________	M	V	P	K	F	G	0	0	0	0	0	1	0	0	0	1	1	1	0	1	3	1	0	0	0	3	0	0	12		1322.8
pep2288	HHPADFTPAVH	0.0904309	0.0244707	0.0918423	0.153491	0.165919	0.219839	2.60829	1.38311	0.0212618	1.6724	1	P01942	HBA_MOUSE	Hemoglobin subunit alpha (Alpha-globin) (Hemoglobin alpha chain)	Hba Hba-a1	NFKLLSHCLLVTLASHHPADFTPAVHASLD	TLASHHPADFTPAVHASLDKFLASVSTVLT	S	H	H	V	H	A	2	0	0	1	0	0	0	0	3	0	0	0	0	1	2	0	1	0	0	1	0	0	11		1227.58
pep100	AASPGATPGSATASAERASTAAPVA	0.0984829	0.0369711	0.0277517	0.123213	0.171625	0.115618	2.51497	1.33054	0.0435521	1.36099	1	O88935	SYN1_MOUSE	Synapsin-1 (Synapsin I)	Syn1 Syn-1	MTDLQRPQPPPPPPSAASPGATPGSATASA	ATASAERASTAAPVASPAAPSPGSSGGGGF	S	A	A	V	A	S	10	1	0	0	0	0	1	2	0	0	0	0	0	0	3	4	3	0	0	1	0	0	25		2169.07
pep6778	YVEKVDELKKKYGI	0.0342255	0.0622315	0.0504731	0.151633	0.105046	0.111941	2.50881	1.327	0.0113097	1.94655	1	P31786	ACBP_MOUSE	Acyl-CoA-binding protein (ACBP) (Diazepam-binding inhibitor) (DBI) (Endozepine) (EP)	Dbi	WNKLKGTSKESAMKTYVEKVDELKKKYGI_	TYVEKVDELKKKYGI_______________	T	Y	V	G	I	-	0	0	0	1	0	0	2	1	0	1	1	4	0	0	0	0	0	0	2	2	0	0	14		1710.96
pep6634	YFDSFGDLSSASAIMGNAKVK	0.0527026	0.0197849	0.0148511	0.0638671	0.074477	0.0771076	2.46685	1.30267	0.0272148	1.5652	1	P02088	HBB1_MOUSE	Hemoglobin subunit beta-1 (Beta-1-globin) (Hemoglobin beta-1 chain) (Hemoglobin beta-major chain)	Hbb-b1	EALGRLLVVYPWTQRYFDSFGDLSSASAIM	DLSSASAIMGNAKVKAHGKKVITAFNDGLN	R	Y	F	V	K	A	3	0	1	2	0	0	0	2	0	1	1	2	1	2	0	4	0	0	1	1	0	0	21		2207.06
pep5211	SLGLGGRSAIEQ	0.0181774	0.00682389	0.00512222	0.0232206	0.0236207	0.0264853	2.4342	1.28345	0.0270569	1.56772	1	P20357	MTAP2_MOUSE	Microtubule-associated protein 2 (MAP-2)	Map2 Mtap2	RDLHSKNKDDLTLSRSLGLGGRSAIEQRSM	LSRSLGLGGRSAIEQRSMSINLPMSCLDSI	R	S	L	E	Q	R	1	1	0	0	0	1	1	3	0	1	2	0	0	0	0	2	0	0	0	0	0	0	12		1186.63
pep6529	VVAAAEKTKQGVTEA	0.0170773	0.00641093	0.00481224	0.0232599	0.0210263	0.0236017	2.39882	1.26233	0.0284431	1.54602	1	Q91ZZ3	SYUB_MOUSE	Beta-synuclein	Sncb	______________________________	VVAAAEKTKQGVTEAAEKTKEGVLYVGSKT	G	V	V	E	A	A	4	0	0	0	0	1	2	1	0	0	0	2	0	0	0	0	2	0	0	3	0	0	15		1500.81
pep188	ADKPDMGEIASFDK	0.0310616	0.0419601	0.0571824	0.112255	0.12813	0.0690381	2.37645	1.24881	0.0358936	1.44498	1	Q6ZWY8	TYB10_MOUSE	Thymosin beta-10	Tmsb10 Ptmb10	______________________________	MADKPDMGEIASFDKAKLKKTETQEKNTLP	M	A	D	D	K	A	2	0	0	3	0	0	1	1	0	1	0	2	1	1	1	1	0	0	0	0	0	0	14		1522.7
pep2685	KHTGPGILSMANAGPNTNGSQFF	0.0504827	0.0189515	0.0142256	0.0567943	0.064751	0.0719503	2.31289	1.20969	0.0398341	1.39974	1	P17742	PPIA_MOUSE	Peptidyl-prolyl cis-trans isomerase A (PPIase A) (EC 5.2.1.8) (Cyclophilin A) (Cyclosporin A-binding protein) (Rotamase A) (SP18) [Cleaved into: Peptidyl-prolyl cis-trans isomerase A, N-terminally processed]	Ppia	RSIYGEKFEDENFILKHTGPGILSMANAGP	SMANAGPNTNGSQFFICTAKTEWLDGKHVV	L	K	H	F	F	I	2	0	3	0	0	1	0	4	1	1	1	1	1	2	2	2	2	0	0	0	0	0	23		2345.12
pep6210	VDREQLVQKARLA	0.098582	0.0331652	0.124474	0.170763	0.244148	0.170711	2.28561	1.19258	0.0398276	1.39982	1	P61982	1433G_MOUSE	14-3-3 protein gamma [Cleaved into: 14-3-3 protein gamma, N-terminally processed]	Ywhag	______________________________	______________________________	M	V	D	L	A	E	2	2	0	1	0	2	1	0	0	0	2	1	0	0	0	0	0	0	0	2	0	0	13		1524.87
pep342	AFTGEISPGMIKDLGATWV	0.028431	0.00611051	0.0229337	0.0388823	0.0437955	0.0469765	2.25583	1.17366	0.0277456	1.55681	1	P17751	TPIS_MOUSE	Triosephosphate isomerase (TIM) (EC 5.3.1.1) (Methylglyoxal synthase) (EC 4.2.3.3) (Triose-phosphate isomerase)	Tpi1 Tpi	KIAVAAQNCYKVTNGAFTGEISPGMIKDLG	EISPGMIKDLGATWVVLGHSERRHVFGESD	G	A	F	W	V	V	2	0	0	1	0	0	1	3	0	2	1	1	1	1	1	1	2	1	0	1	0	0	19		1992
pep64	AALTRNPQFQKLLE	0.0516422	0.0193868	0.0931967	0.125951	0.121269	0.12138	2.24447	1.16638	0.0335166	1.47474	1	P06745	G6PI_MOUSE	Glucose-6-phosphate isomerase (GPI) (EC 5.3.1.9) (Autocrine motility factor) (AMF) (Neuroleukin) (NLK) (Phosphoglucose isomerase) (PGI) (Phosphohexose isomerase) (PHI)	Gpi Gpi1	______________________________	MAALTRNPQFQKLLEWHRANSANLKLRELF	M	A	A	L	E	W	2	1	1	0	0	2	1	0	0	0	3	1	0	1	1	0	1	0	0	0	0	0	14		1627.9
pep2354	HRDTGILDSIGRFFSG	0.0162766	0.00611033	0.0045866	0.0187155	0.019211	0.0213645	2.19812	1.13627	0.0456327	1.34072	1	P04370	MBP_MOUSE	Myelin basic protein (MBP) (Myelin A1 protein)	Mbp Shi	TASTMDHARHGFLPRHRDTGILDSIGRFFS	RDTGILDSIGRFFSGDRGAPKRGSGKDSHT	R	H	R	S	G	D	0	2	0	2	0	0	0	3	1	2	1	0	0	2	0	2	1	0	0	0	0	0	16		1776.89
pep542	AKVAVLGASGGIGQPLSLLL	0.206777	0.067772	0.286229	0.39417	0.397956	0.343362	2.02484	1.01781	0.0444351	1.35227	1	P08249	MDHM_MOUSE	Malate dehydrogenase, mitochondrial (EC 1.1.1.37)	Mdh2 Mor1	GAALRRSFSTSAQNNAKVAVLGASGGIGQP	LGASGGIGQPLSLLLKNSPLVSRLTLYDIA	N	A	K	L	L	K	3	0	0	0	0	1	0	4	0	1	5	1	0	0	1	2	0	0	0	2	0	0	20		1863.12
pep4410	RDTGILDSIGRFFSGDR	0.901138	0.4147	0.55518	1.41986	1.29759	1.05472	2.01611	1.01157	0.024442	1.61186	1	P04370	MBP_MOUSE	Myelin basic protein (MBP) (Myelin A1 protein)	Mbp Shi	ASTMDHARHGFLPRHRDTGILDSIGRFFSG	TGILDSIGRFFSGDRGAPKRGSGKDSHTRT	H	R	D	D	R	G	0	3	0	3	0	0	0	3	0	2	1	0	0	2	0	2	1	0	0	0	0	0	17		1910.96
pep5313	SPAAPSPGSSGGGGFFSSLSNAVK	0.0239372	0.0284357	0.024492	0.0393211	0.0635244	0.0514195	2.00696	1.00502	0.0223759	1.65022	1	O88935	SYN1_MOUSE	Synapsin-1 (Synapsin I)	Syn1 Syn-1	ATASAERASTAAPVASPAAPSPGSSGGGGF	SGGGGFFSSLSNAVKQTTAAAAATFSEQVG	A	S	P	V	K	Q	3	0	1	0	0	0	0	5	0	0	1	1	0	2	3	7	0	0	0	1	0	0	24		2165.04
pep2346	HQSGFSLSGAQIDDNIPRRTTQ	0.309848	0.196891	0.37049	0.114648	0.149075	0.169188	0.493499	-1.01888	0.0498861	1.30202	-1	O08553	DPYL2_MOUSE	Dihydropyrimidinase-related protein 2 (DRP-2) (Unc-33-like phosphoprotein 2) (ULIP-2)	Dpysl2 Crmp2 Ulip2	KTSPAKQQAPPVRNLHQSGFSLSGAQIDDN	SGAQIDDNIPRRTTQRIVAPPGGRANITSL	L	H	Q	T	Q	R	1	2	1	2	0	3	0	2	1	2	1	0	0	1	1	3	2	0	0	0	0	0	22		2427.19
pep1362	DTGILDSIGRFFS	0.36652	0.271931	0.415018	0.259914	0.106739	0.140474	0.481388	-1.05473	0.0438069	1.35846	-1	P04370	MBP_MOUSE	Myelin basic protein (MBP) (Myelin A1 protein)	Mbp Shi	STMDHARHGFLPRHRDTGILDSIGRFFSGD	HRDTGILDSIGRFFSGDRGAPKRGSGKDSH	R	D	T	F	S	G	0	1	0	2	0	0	0	2	0	2	1	0	0	2	0	2	1	0	0	0	0	0	13		1426.71
pep2140	GSAKVAFSAIRSTN	0.328068	0.299024	0.391665	0.0988691	0.132988	0.248588	0.471599	-1.08437	0.027515	1.56043	-1	Q9R171	CBLN1_MOUSE	Cerebellin-1 (Brain protein D3) (Precerebellin) [Cleaved into: Cerebellin (CER); [des-Ser1]-cerebellin (des-Ser1-cerebellin)]	Cbln1	TSDPTGTALGISVRSGSAKVAFSAIRSTNH	SGSAKVAFSAIRSTNHEPSEMSNRTMIIYF	S	G	S	T	N	H	3	1	1	0	0	0	0	1	0	1	0	1	0	1	0	3	1	0	0	1	0	0	14		1407.75
pep1998	GKYTPSGQSGAAASESLFISNHAY	0.0624543	0.0696601	0.0552673	0.0328528	0.00721565	0.0452378	0.455254	-1.13526	0.0464348	1.33316	-1	P05064	ALDOA_MOUSE	Fructose-bisphosphate aldolase A (EC 4.1.2.13) (Aldolase 1) (Muscle-type aldolase)	Aldoa Aldo1	EEYIKRALANSLACQGKYTPSGQSGAAASE	GAAASESLFISNHAY_______________	Q	G	K	A	Y	-	4	0	1	0	0	1	1	3	1	1	1	1	0	1	1	5	1	0	2	0	0	0	24		2442.15
pep1506	ERPVFTNHFLVELHKD	0.0551405	0.0480885	0.0388411	0.0186392	0.0243635	0.0216216	0.454875	-1.13646	0.00668639	2.17481	-1	P21661	NEC2_MOUSE	Neuroendocrine convertase 2 (NEC 2) (EC 3.4.21.94) (KEX2-like endoprotease 2) (Prohormone convertase 2) (Proprotein convertase 2) (PC2)	Pcsk2 Nec-2 Nec2	KAAGFLFCVMVFASAERPVFTNHFLVELHK	RPVFTNHFLVELHKDGEEEARQVAAEHGFG	A	E	R	K	D	G	0	1	1	1	0	0	2	0	2	0	2	1	0	2	1	0	1	0	0	2	0	0	16		1980.02
pep6679	YIQQVRKAPSG	0.112114	0.13304	0.14664	0.0126304	0.0857448	0.0760871	0.44529	-1.16718	0.0443918	1.3527	-1	P09240	CCKN_MOUSE	Cholecystokinin (CCK) [Cleaved into: Cholecystokinin-33 (CCK33); Cholecystokinin-12 (CCK12); Cholecystokinin-8 (CCK8)]	Cck	TDGEPRARLGALLARYIQQVRKAPSGRMSV	LLARYIQQVRKAPSGRMSVLKNLQSLDPSH	R	Y	I	S	G	R	1	1	0	0	0	2	0	1	0	1	0	1	0	0	1	1	0	0	1	1	0	0	11		1245.68
pep3051	LLDEGHYPV	0.203863	0.314231	0.358482	0.132825	0.116785	0.136043	0.439953	-1.18458	0.024233	1.61559	-1	P16014	SCG1_MOUSE	Secretogranin-1 (Chromogranin-B) (CgB) (Secretogranin I) (SgI) [Cleaved into: CCB peptide; PE-11]	Chgb Scg-1 Scg1	EPGAHSALDTREEKRLLDEGHYPVRESPID	TREEKRLLDEGHYPVRESPIDTAKRYPQSK	R	L	L	P	V	R	0	0	0	1	0	0	1	1	1	0	2	0	0	0	1	0	0	0	1	1	0	0	9		1041.51
pep6737	YPQSKWQEQ	0.0410893	0.0626649	0.0755962	0.00510743	0.0280444	0.0322583	0.364706	-1.45519	0.0444737	1.3519	-1	P16014	SCG1_MOUSE	Secretogranin-1 (Chromogranin-B) (CgB) (Secretogranin I) (SgI) [Cleaved into: CCB peptide; PE-11]	Chgb Scg-1 Scg1	GHYPVRESPIDTAKRYPQSKWQEQEKNYLN	IDTAKRYPQSKWQEQEKNYLNYGEEGDQGR	R	Y	P	E	Q	E	0	0	0	0	0	3	1	0	0	0	0	1	0	0	1	1	0	1	1	0	0	0	9		1192.55
pep2885	LADPTGAFGKATDL	0.0535004	0.06112	0.0406626	0.00507034	0.0278408	0.0231064	0.360744	-1.47095	0.0224458	1.64887	-1	P99029	PRDX5_MOUSE	Peroxiredoxin-5, mitochondrial (EC 1.11.1.24) (Antioxidant enzyme B166) (AOEB166) (Liver tissue 2D-page spot 2D-0014IV) (PLP) (Peroxiredoxin V) (Prx-V) (Peroxisomal antioxidant enzyme) (Thioredoxin peroxidase PMP20) (Thioredoxin-dependent peroxiredoxin 5)	Prdx5 Prdx6	EEWGRAHQAEGKVRLLADPTGAFGKATDLL	LLADPTGAFGKATDLLLDDSLVSLFGNRRL	L	L	A	D	L	L	3	0	0	2	0	0	0	2	0	0	2	1	0	1	1	0	2	0	0	0	0	0	14		1375.7
pep4384	RATSNVFAMFDQSQIQEF	0.132391	0.110151	0.0835203	0.0225442	0.035799	0.0556858	0.349716	-1.51574	0.0144484	1.84018	-1	Q9CQ19	MYL9_MOUSE	Myosin regulatory light polypeptide 9 (Myosin regulatory light chain 2, smooth muscle isoform) (Myosin regulatory light chain 9)	Myl9 Myrl2	SSKRAKAKTTKKRPQRATSNVFAMFDQSQI	SNVFAMFDQSQIQEFKEAFNMIDQNRDGFI	Q	R	A	E	F	K	2	1	1	1	0	3	1	0	0	1	0	0	1	3	0	2	1	0	0	1	0	0	18		2117.98
pep928	ASLKPEFVDIINAKQ	0.0721663	0.0670075	0.0557093	0.00356722	0.0479225	0.015856	0.34557	-1.53295	0.0392427	1.40624	-1	P17751	TPIS_MOUSE	Triosephosphate isomerase (TIM) (EC 5.3.1.1) (Methylglyoxal synthase) (EC 4.2.3.3) (Triose-phosphate isomerase)	Tpi1 Tpi	ELASQPDVDGFLVGGASLKPEFVDIINAKQ	ASLKPEFVDIINAKQ_______________	G	A	S	K	Q	-	2	0	1	1	0	1	1	0	0	2	1	2	0	1	1	1	0	0	0	1	0	0	15		1671.92
pep5832	TGILDSIGRFFSGDRG	0.0979082	0.0848215	0.0788007	0.0256625	0.0155844	0.0465055	0.335534	-1.57547	0.00566	2.24718	-1	P04370	MBP_MOUSE	Myelin basic protein (MBP) (Myelin A1 protein)	Mbp Shi	TMDHARHGFLPRHRDTGILDSIGRFFSGDR	GILDSIGRFFSGDRGAPKRGSGKDSHTRTT	D	T	G	R	G	A	0	2	0	2	0	0	0	4	0	2	1	0	0	2	0	2	1	0	0	0	0	0	16		1696.85
pep1446	ELFADKVPKTAENF	0.839595	0.907983	1.09771	0.331344	0.316119	0.29746	0.332101	-1.5903	0.00123965	2.9067	-1	P17742	PPIA_MOUSE	Peptidyl-prolyl cis-trans isomerase A (PPIase A) (EC 5.2.1.8) (Cyclophilin A) (Cyclosporin A-binding protein) (Rotamase A) (SP18) [Cleaved into: Peptidyl-prolyl cis-trans isomerase A, N-terminally processed]	Ppia	FDITADDEPLGRVSFELFADKVPKTAENFR	FELFADKVPKTAENFRALSTGEKGFGYKGS	F	E	L	N	F	R	2	0	1	1	0	0	2	0	0	0	1	2	0	2	1	0	1	0	0	1	0	0	14		1607.82
pep4742	RTLAGNPKATPPQIVNGNH	0.0506661	0.062065	0.0593767	0.00589223	0.0434406	0.0052381	0.317075	-1.65711	0.0401886	1.3959	-1	Q91VW3	SH3L3_MOUSE	SH3 domain-binding glutamic acid-rich-like protein 3	Sh3bgrl3	QLVDISQDNALRDEMRTLAGNPKATPPQIV	GNPKATPPQIVNGNHYCGDYELFVEAVEQD	M	R	T	N	H	Y	2	1	3	0	0	1	0	2	1	1	1	1	0	0	3	0	2	0	0	1	0	0	19		1984.06
pep1606	FGGFTGARKSARKLANQ	0.233837	0.139765	0.313416	0.0794917	0.0571826	0.0656431	0.294487	-1.76373	0.0331333	1.47974	-1	Q64387	PNOC_MOUSE	Prepronociceptin (N23K/N27K) [Cleaved into: Nocistatin; Nociceptin (Orphanin FQ) (PPNOC); Orphanin FQ2]	Pnoc Npnc1	ADDAEEVEQKQLQKRFGGFTGARKSARKLA	GFTGARKSARKLANQKRFSEFMRQYLVLSM	R	F	G	N	Q	K	3	2	1	0	0	1	0	3	0	0	1	2	0	2	0	1	1	0	0	0	0	0	17		1807.98
pep1177	AYGFRDPGPQL	0.0728402	0.0619711	0.0951934	0.00583581	0.0320439	0.028797	0.289893	-1.78641	0.0131007	1.8827	-1	P26339	CMGA_MOUSE	Chromogranin-A (CgA) [Cleaved into: Pancreastatin; Beta-granin; WE-14; Catestatin; GE-25; Serpinin-RRG; Serpinin (AL26); p-Glu serpinin precursor]	Chga	EDDPDRSMKLSFRTRAYGFRDPGPQLRRGW	FRTRAYGFRDPGPQLRRGWRPSSREDSVEA	R	A	Y	Q	L	R	1	1	0	1	0	1	0	2	0	0	1	0	0	1	2	0	0	0	1	0	0	0	11		1219.6
pep1884	GFLVGGASLKPEFVDIINAKQ	0.0299443	0.0494362	0.0613762	0.00318938	0.0175126	0.0197805	0.287606	-1.79784	0.0337249	1.47205	-1	P17751	TPIS_MOUSE	Triosephosphate isomerase (TIM) (EC 5.3.1.1) (Methylglyoxal synthase) (EC 4.2.3.3) (Triose-phosphate isomerase)	Tpi1 Tpi	TGATCKELASQPDVDGFLVGGASLKPEFVD	ASLKPEFVDIINAKQ_______________	D	G	F	K	Q	-	2	0	1	1	0	1	1	3	0	2	2	2	0	2	1	1	0	0	0	2	0	0	21		2202.2
pep700	APLVETSTPL	0.0422602	0.0571374	0.0646198	0.00542442	0.035366	0.00482223	0.278097	-1.84634	0.0305148	1.51549	-1	Q9QXV0	PCS1N_MOUSE	ProSAAS (IA-4) (Proprotein convertase subtilisin/kexin type 1 inhibitor) (Proprotein convertase 1 inhibitor) (pro-SAAS) [Cleaved into: KEP; Big SAAS (b-SAAS); Little SAAS (l-SAAS); Big PEN-LEN (b-PEN-LEN) (SAAS CT(1-49)); PEN; PEN-20; PEN-19; Little LEN (l-LEN); Big LEN (b-LEN) (SAAS CT(25-40))]	Pcsk1n	SARPVKEPRSLSAASAPLVETSTPLRLRRA	LSAASAPLVETSTPLRLRRAVPRGEAAGAV	S	A	P	P	L	R	1	0	0	0	0	0	1	0	0	0	2	0	0	0	2	1	2	0	0	1	0	0	10		1026.56
pep913	ASLDKFLASVSTVL	0.0933197	0.112681	0.0921704	0.0575581	0.0117478	0.00950991	0.264331	-1.91958	0.012664	1.89743	-1	P01942	HBA_MOUSE	Hemoglobin subunit alpha (Alpha-globin) (Hemoglobin alpha chain)	Hba Hba-a1	TLASHHPADFTPAVHASLDKFLASVSTVLT	HASLDKFLASVSTVLTSKYR__________	H	A	S	V	L	T	2	0	0	1	0	0	0	0	0	0	3	1	0	1	0	3	1	0	0	2	0	0	14		1449.81
pep221	ADPTGAFGKATDL	0.18826	0.245237	0.147297	0.114767	0.0204585	0.0165613	0.261345	-1.93598	0.0289367	1.53855	-1	P99029	PRDX5_MOUSE	Peroxiredoxin-5, mitochondrial (EC 1.11.1.24) (Antioxidant enzyme B166) (AOEB166) (Liver tissue 2D-page spot 2D-0014IV) (PLP) (Peroxiredoxin V) (Prx-V) (Peroxisomal antioxidant enzyme) (Thioredoxin peroxidase PMP20) (Thioredoxin-dependent peroxiredoxin 5)	Prdx5 Prdx6	EWGRAHQAEGKVRLLADPTGAFGKATDLLL	LLADPTGAFGKATDLLLDDSLVSLFGNRRL	L	A	D	D	L	L	3	0	0	2	0	0	0	2	0	0	1	1	0	1	1	0	2	0	0	0	0	0	13		1262.61
pep427	AGQAFRKFLPLFDRVLV	0.399863	0.515717	0.250149	0.0459026	0.159635	0.0983881	0.260717	-1.93944	0.0263859	1.57863	-1	Q64433	CH10_MOUSE	10 kDa heat shock protein, mitochondrial (Hsp10) (10 kDa chaperonin) (Chaperonin 10) (CPN10)	Hspe1	______________________________	QAFRKFLPLFDRVLVERSAAETVTKGGIML	M	A	G	L	V	E	2	2	0	1	0	1	0	1	0	0	3	1	0	3	1	0	0	0	0	2	0	0	17		1976.14
pep4536	RKFFVGGNWKMNGRKK	1.00505	1.03054	2.04776	0.436606	0.383517	0.189256	0.247194	-2.01628	0.0434682	1.36183	-1	P17751	TPIS_MOUSE	Triosephosphate isomerase (TIM) (EC 5.3.1.1) (Methylglyoxal synthase) (EC 4.2.3.3) (Triose-phosphate isomerase)	Tpi1 Tpi	______________________________	KFFVGGNWKMNGRKKCLGELICTLNAANVP	T	R	K	K	K	C	0	2	2	0	0	0	0	3	0	0	0	4	1	2	0	0	0	1	0	1	0	0	16		1952.07
pep2666	KGNDISSGTVLSDYV	0.061052	0.0479881	0.0333278	0.00421516	0.00462901	0.0261313	0.245669	-2.02521	0.0294739	1.53056	-1	P70296	PEBP1_MOUSE	Phosphatidylethanolamine-binding protein 1 (PEBP-1) (HCNPpp) [Cleaved into: Hippocampal cholinergic neurostimulating peptide (HCNP)]	Pebp1 Pbp Pebp	DPKFREWHHFLVVNMKGNDISSGTVLSDYV	KGNDISSGTVLSDYVGSGPPSGTGLHRYVW	M	K	G	Y	V	G	0	0	1	2	0	0	0	2	0	1	1	1	0	0	0	3	1	0	1	2	0	0	15		1553.76
pep6037	TQVVHESFQGRSR	0.617011	0.470617	0.380857	0.0187531	0.102971	0.224631	0.235859	-2.084	0.0148071	1.82953	-1	P20917	MAG_MOUSE	Myelin-associated glycoprotein (Siglec-4a)	Mag	SPYPKNYPPVVFKSRTQVVHESFQGRSRLL	SRTQVVHESFQGRSRLLGDLGLRNCTLLLS	R	T	Q	S	R	L	0	2	0	0	0	2	1	1	1	0	0	0	0	1	0	2	1	0	0	2	0	0	13		1529.77
pep5334	SPFYLRPPSFLRAPSWIDTGL	0.0669932	0.100124	0.0670229	0.00816515	0.00896682	0.0362935	0.228177	-2.13177	0.0138791	1.85764	-1	P23927	CRYAB_MOUSE	Alpha-crystallin B chain (Alpha(B)-crystallin) (P23)	Cryab Crya2	EHLLESDLFSTATSLSPFYLRPPSFLRAPS	PPSFLRAPSWIDTGLSEMRLEKDRFSVNLD	L	S	P	G	L	S	1	2	0	1	0	0	0	1	0	1	3	0	0	2	4	3	1	1	1	0	0	0	21		2419.27
pep750	APSGRMSVLKNLQSLDPSHRISD	0.142232	0.1409	0.277216	0.0133765	0.078123	0.0118915	0.184512	-2.43821	0.0386514	1.41283	-1	P09240	CCKN_MOUSE	Cholecystokinin (CCK) [Cleaved into: Cholecystokinin-33 (CCK33); Cholecystokinin-12 (CCK12); Cholecystokinin-8 (CCK8)]	Cck	RLGALLARYIQQVRKAPSGRMSVLKNLQSL	LKNLQSLDPSHRISDRDYMGWMDFGRRSAE	K	A	P	S	D	R	1	2	1	2	0	1	0	1	1	1	3	1	1	0	2	5	0	0	0	1	0	0	23		2507.29
pep4570	RLLVVYPWTQR	0.0319793	0.0680092	0.0435816	0.00551202	0.00605319	0.0049001	0.114685	-3.12425	0.01629	1.78808	-1	P02088	HBB1_MOUSE	Hemoglobin subunit beta-1 (Beta-1-globin) (Hemoglobin beta-1 chain) (Hemoglobin beta-major chain)	Hbb-b1	WGKVNSDEVGGEALGRLLVVYPWTQRYFDS	EALGRLLVVYPWTQRYFDSFGDLSSASAIM	G	R	L	Q	R	Y	0	2	0	0	0	1	0	0	0	0	2	0	0	0	1	0	1	1	1	2	0	0	11		1429.82
pep2650	KGFGYAEFEDLDSLLSAL	0.034947	0.0382686	0.0279646	0.00353684	0.00388409	0.0031442	0.104419	-3.25954	0.000579084	3.23726	-1	Q8BGD9	IF4B_MOUSE	Eukaryotic translation initiation factor 4B (eIF-4B)	Eif4b	SAVRLPREPSNPDRLKGFGYAEFEDLDSLL	GYAEFEDLDSLLSALSLNEESLGNRRIRVD	L	K	G	A	L	S	2	0	0	2	0	0	2	2	0	0	4	1	0	2	0	2	0	0	1	0	0	0	18		1973.96
pep2716	KMIYASSKDAIK	0.0599321	0.077498	0.119873	0.0191186	0.00419914	0.00339923	0.103835	-3.26764	0.014233	1.8467	-1	P18760	COF1_MOUSE	Cofilin-1 (Cofilin, non-muscle isoform)	Cfl1	LVFIFWAPENAPLKSKMIYASSKDAIKKKL	LKSKMIYASSKDAIKKKLTGIKHELQANCY	S	K	M	I	K	K	2	0	0	1	0	0	0	0	0	2	0	3	1	0	0	2	0	0	1	0	0	0	12		1353.73
pep6466	VPRGEAAGAVQELA	0.401989	0.569049	0.608959	0.0540235	0.0593276	0.048026	0.102138	-3.29141	0.00173465	2.76079	-1	Q9QXV0	PCS1N_MOUSE	ProSAAS (IA-4) (Proprotein convertase subtilisin/kexin type 1 inhibitor) (Proprotein convertase 1 inhibitor) (pro-SAAS) [Cleaved into: KEP; Big SAAS (b-SAAS); Little SAAS (l-SAAS); Big PEN-LEN (b-PEN-LEN) (SAAS CT(1-49)); PEN; PEN-20; PEN-19; Little LEN (l-LEN); Big LEN (b-LEN) (SAAS CT(25-40))]	Pcsk1n	APLVETSTPLRLRRAVPRGEAAGAVQELAR	AVPRGEAAGAVQELARALAHLLEAERQERA	A	V	P	L	A	R	4	1	0	0	0	1	2	2	0	0	1	0	0	0	1	0	0	0	0	2	0	0	14		1366.72
pep3643	NDRTIEGDFLWSDGAPLLYE	0.0305191	0.036029	0.033864	0.00342046	0.00375629	0.00304074	0.101756	-3.29682	4.91261e-05	4.30869	-1	Q61361	PGCB_MOUSE	Brevican core protein	Bcan	DFVNDRYREYQWIGLNDRTIEGDFLWSDGA	EGDFLWSDGAPLLYENWNPGQPDSYFLSGE	L	N	D	Y	E	N	1	1	1	3	0	0	2	2	0	1	3	0	0	1	1	1	1	1	1	0	0	0	20		2310.08
pep1383	DYAGVTVDELGKVLTPTQVM	0.0192685	0.0411035	0.0221148	0.00279698	0.00307159	0.00248647	0.101289	-3.30344	0.0226673	1.6446	-1	P70296	PEBP1_MOUSE	Phosphatidylethanolamine-binding protein 1 (PEBP-1) (HCNPpp) [Cleaved into: Hippocampal cholinergic neurostimulating peptide (HCNP)]	Pebp1 Pbp Pebp	CLQEVDEPPQHALRVDYAGVTVDELGKVLT	TVDELGKVLTPTQVMNRPSSISWDGLDPGK	V	D	Y	V	M	N	1	0	0	2	0	1	1	2	0	0	2	1	1	0	1	0	3	0	1	4	0	0	20		2135.08
pep2829	KVAFSAVRSTN	0.047918	0.0657342	0.0762106	0.00624058	0.00685328	0.00554778	0.0981848	-3.34836	0.0023088	2.63661	-1	Q8BME9	CBLN4_MOUSE	Cerebellin-4 (Cerebellin-like glycoprotein 1)	Cbln4 Cblnl1	SSSSPLGISVRAANSKVAFSAVRSTNHEPS	AANSKVAFSAVRSTNHEPSEMSNKTRIIYF	S	K	V	T	N	H	2	1	1	0	0	0	0	0	0	0	0	1	0	1	0	2	1	0	0	2	0	0	11		1178.64
pep6014	TQAGSEVSALLGRIPSAVGY	0.0198373	0.022764	0.0147674	0.00186771	0.00205109	0.00166037	0.0972512	-3.36214	0.0017954	2.74584	-1	P56480	ATPB_MOUSE	ATP synthase subunit beta, mitochondrial (EC 7.1.2.2) (ATP synthase F1 subunit beta)	Atp5f1b Atp5b	EGQDVLLFIDNIFRFTQAGSEVSALLGRIP	EVSALLGRIPSAVGYQPTLATDMGTMQERI	F	T	Q	G	Y	Q	3	1	0	0	0	1	1	3	0	1	2	0	0	0	1	3	1	0	1	2	0	0	20		1975.04
pep3309	MDQLAKELTAE	0.0292015	0.0301322	0.0519281	0.00286064	0.0031415	0.00254307	0.0768028	-3.7027	0.00995659	2.00189	-1	P26339	CMGA_MOUSE	Chromogranin-A (CgA) [Cleaved into: Pancreastatin; Beta-granin; WE-14; Catestatin; GE-25; Serpinin-RRG; Serpinin (AL26); p-Glu serpinin precursor]	Chga	EERLSREWEDKRWSRMDQLAKELTAEKRLE	RWSRMDQLAKELTAEKRLEGEDDPDRSMKL	R	M	D	A	E	K	2	0	0	1	0	1	2	0	0	0	2	1	1	0	0	0	1	0	0	0	0	0	11		1247.61
pep492	AHLLEAERQE	0.0376881	0.0383542	0.0730828	0.00364121	0.00399871	0.00323698	0.0729381	-3.77718	0.0169346	1.77122	-1	Q9QXV0	PCS1N_MOUSE	ProSAAS (IA-4) (Proprotein convertase subtilisin/kexin type 1 inhibitor) (Proprotein convertase 1 inhibitor) (pro-SAAS) [Cleaved into: KEP; Big SAAS (b-SAAS); Little SAAS (l-SAAS); Big PEN-LEN (b-PEN-LEN) (SAAS CT(1-49)); PEN; PEN-20; PEN-19; Little LEN (l-LEN); Big LEN (b-LEN) (SAAS CT(25-40))]	Pcsk1n	RGEAAGAVQELARALAHLLEAERQERARAE	LARALAHLLEAERQERARAEAQEAEDQQAR	L	A	H	Q	E	R	2	1	0	0	0	1	3	0	1	0	2	0	0	0	0	0	0	0	0	0	0	0	10		1194.6
[truncated: 38 more columns]
